# Supplementary material for: Fish and marine fatty acids intakes, the FADS genotypes and long-term weight gain: a prospective cohort study
Source: PubMed Central journal article supplement — BMJ Open. 2019 Jul 31;9(7):e022877. doi: 10.1136/bmjopen-2018-022877 (PMC6678013; doi:10.1136/bmjopen-2018-022877), 2019-07-31
Supplement: bmjopen-2018-022877.draft_revisions.pdf [file bmjopen-2018-022877.draft_revisions.pdf]

# BMJ Open

BMJ Open is committed to open peer review. As part of this commitment we make the peer review history of every article we publish publicly available.

When an article is published we post the peer reviewers' comments and the authors' responses online. We also post the versions of the paper that were used during peer review. These are the versions that the peer review comments apply to.

The versions of the paper that follow are the versions that were submitted during the peer review process. They are not the versions of record or the final published versions. They should not be cited or distributed as the published version of this manuscript.

BMJ Open is an open access journal and the full, final, typeset and author-corrected version of record of the manuscript is available on our site with no access controls, subscription charges or pay-per-view fees (<http://bmjopen.bmj.com>).

If you have any questions on BMJ Open's open peer review process please email [info.bmjopen@bmj.com](mailto:info.bmjopen@bmj.com)

# BMJ Open

## Fish and marine fatty acids, genetic variant of FADS gene, and long-term weight gain

|                               |                                                                                                                                                                                                                                                                                                                                                                                                                                                                                                                                                                                                                                                                                                                                                                                                                                                                                                                                                                                                                                                                                                                                                                                                                                                                                                                                                                                                                                                                                                                                                                                                                                                                                                                                                                                                                                                                                                                                                                                                                                                          |
|-------------------------------|----------------------------------------------------------------------------------------------------------------------------------------------------------------------------------------------------------------------------------------------------------------------------------------------------------------------------------------------------------------------------------------------------------------------------------------------------------------------------------------------------------------------------------------------------------------------------------------------------------------------------------------------------------------------------------------------------------------------------------------------------------------------------------------------------------------------------------------------------------------------------------------------------------------------------------------------------------------------------------------------------------------------------------------------------------------------------------------------------------------------------------------------------------------------------------------------------------------------------------------------------------------------------------------------------------------------------------------------------------------------------------------------------------------------------------------------------------------------------------------------------------------------------------------------------------------------------------------------------------------------------------------------------------------------------------------------------------------------------------------------------------------------------------------------------------------------------------------------------------------------------------------------------------------------------------------------------------------------------------------------------------------------------------------------------------|
| Journal:                      | <i>BMJ Open</i>                                                                                                                                                                                                                                                                                                                                                                                                                                                                                                                                                                                                                                                                                                                                                                                                                                                                                                                                                                                                                                                                                                                                                                                                                                                                                                                                                                                                                                                                                                                                                                                                                                                                                                                                                                                                                                                                                                                                                                                                                                          |
| Manuscript ID                 | bmjopen-2018-022877                                                                                                                                                                                                                                                                                                                                                                                                                                                                                                                                                                                                                                                                                                                                                                                                                                                                                                                                                                                                                                                                                                                                                                                                                                                                                                                                                                                                                                                                                                                                                                                                                                                                                                                                                                                                                                                                                                                                                                                                                                      |
| Article Type:                 | Research                                                                                                                                                                                                                                                                                                                                                                                                                                                                                                                                                                                                                                                                                                                                                                                                                                                                                                                                                                                                                                                                                                                                                                                                                                                                                                                                                                                                                                                                                                                                                                                                                                                                                                                                                                                                                                                                                                                                                                                                                                                 |
| Date Submitted by the Author: | 13-Mar-2018                                                                                                                                                                                                                                                                                                                                                                                                                                                                                                                                                                                                                                                                                                                                                                                                                                                                                                                                                                                                                                                                                                                                                                                                                                                                                                                                                                                                                                                                                                                                                                                                                                                                                                                                                                                                                                                                                                                                                                                                                                              |
| Complete List of Authors:     | <p>Huang, Tao<br/> Wang, Tiange ; Department of Epidemiology, School of Public Health and Tropical Medicine, Tulane University<br/> Heianza, Yoriko ; Department of Epidemiology, School of Public Health and Tropical Medicine, Tulane University<br/> Wiggs, Janey ; Harvard Medical School, Massachusetts Eye and Ear Infirmary<br/> Sun, Dianjianyi ; School of Public Health and Tropical Medicine, Tulane University<br/> Han, Liyuan ; School of Public Health and Tropical Medicine, Tulane University<br/> Choi, Hyon-Kyoo ; Massachusetts General Hospital - Harvard Medical School Center for Nervous System Repair<br/> Chai, Jin Fang ; National University Singapore Yong Loo Lin School of Medicine<br/> Sim, Xueling ; Epidemiology Domain Saw Swee Hock School of Public Health, National University of Singapore<br/> Khor, Chiea Chuen ; Epidemiology Domain Saw Swee Hock School of Public Health, National University of Singapore<br/> Friedlander, Yechiel ; Hebrew University-Hadassah Braun School of Public Health<br/> Chan, Andrew T. ; Division of Gastroenterology, Massachusetts General Hospital<br/> Curhan, Gary ; Department of Epidemiology, Harvard School of Public Health<br/> Vivo, Immaculata De ; Department of Epidemiology, Harvard School of Public Health<br/> van Dam, Rob Martinu. ; Saw Swee Hock School of Public Health, National University of Singapore<br/> Heng, Chew Kiat ; Department of Paediatrics National University of Singapore<br/> Fuchs, Charles S. ; Brigham and Women's Hospital and Harvard Medical School<br/> Pasquale, Louis R. ; Department of Medicine, Brigham and Women's Hospital and Harvard Medical School<br/> Yuan, Jian-min ; Division of Cancer Control and Population Sciences, University of Pittsburgh Cancer Institute<br/> Hu, Frank B. ; Department of Nutrition, Harvard School of Public Health<br/> Koh, Woon Puay ; Duke-NUS Medical School<br/> Qi, Lu ; Tulane University, Department of Epidemiology, School of Public Health and Tropical Medicine,</p> |

1  
2  
3  
4  
5  
6  
7  
8  
9  
10  
11  
12  
13  
14  
15  
16  
17  
18  
19  
20  
21  
22  
23  
24  
25  
26  
27  
28  
29  
30  
31  
32  
33  
34  
35  
36  
37  
38  
39  
40  
41  
42  
43  
44  
45  
46  
47  
48  
49  
50  
51  
52  
53  
54  
55  
56  
57  
58  
59  
60

|           |                                                                               |
|-----------|-------------------------------------------------------------------------------|
| Keywords: | NUTRITION & DIETETICS, GENETICS, EPIDEMIOLOGY, obesity, gene-diet interaction |
|           |                                                                               |

SCHOLARONE™  
Manuscripts

For peer review only

## **Fish and marine fatty acids, genetic variant of *FADS* gene, and long-term weight gain**

Tao Huang<sup>1,2,3,4\*</sup>, Tiange Wang<sup>3</sup>, Yoriko Heianza<sup>3</sup>, Janey Wiggs<sup>5</sup>, Dianjianyi Sun<sup>3</sup>, Liyuan Han<sup>3</sup>, Hyon-Kyoo Choi<sup>6</sup>, Jin Fang Chai<sup>2</sup>, Xueling Sim<sup>2</sup>, Chiea Chuen Khor<sup>7,8</sup>, Yechiel Friedlander<sup>9</sup>, Andrew T. Chan<sup>10</sup>, Gary Curhan<sup>11</sup>, Immaculata De Vivo<sup>11</sup>, Rob Martinu. van Dam<sup>2,4</sup>, Chew Kiat Heng<sup>12</sup>, Charles S. Fuchs<sup>13,14</sup>, Louis R. Pasquale<sup>15</sup>, Jian-min Yuan<sup>16,17</sup>, Frank B. Hu<sup>4,13</sup>, Woon Puay Koh<sup>2,18</sup>, Lu Qi<sup>3,4,19\*</sup>

<sup>1</sup>Department of Epidemiology and Biostatistics, School of Public Health, Peking University, Beijing 100191, China

<sup>2</sup>Epidemiology Domain Saw Swee Hock School of Public Health, National University of Singapore, Singapore, 117549.

<sup>3</sup>Department of Epidemiology, School of Public Health and Tropical Medicine, Tulane University, 1440 Canal Street, Suite 1724 New Orleans, LA 70112;

<sup>4</sup>Department of Nutrition, Harvard School of Public Health, Boston, MA 02115, USA;

<sup>5</sup>Department of Ophthalmology, Harvard Medical School, Massachusetts Eye and Ear Infirmary, Boston, MA 02115, USA;

<sup>6</sup>Department of Rheumatology, Massachusetts General Hospital and Harvard Medical School, Boston, MA 02115, USA;

<sup>7</sup>Genome Institute of Singapore, Agency for Science, Technology and Research, Singapore.

<sup>8</sup>Department of Biochemistry, Yong Loo Lin School of Medicine, National University of Singapore, Singapore.

<sup>9</sup>Unit of Epidemiology, Hebrew University-Hadassah Braun School of Public Health, POB 12272, Jerusalem 91120, Israel.

<sup>10</sup>Division of Gastroenterology, Massachusetts General Hospital, Boston, MA 02114, USA;

<sup>11</sup>Department of Epidemiology, Harvard School of Public Health, Boston, MA 02115, USA;

<sup>12</sup>Department of Paediatrics National University of Singapore NUHS Tower Block, Level 12, 1E Kent Ridge Road Singapore 119228

<sup>13</sup>Department of Medicine, Brigham and Women's Hospital and Harvard Medical School, Boston, MA

02115, USA;

<sup>14</sup>*The Center for Gastrointestinal Cancer, Dana-Farber Cancer Institute*

<sup>15</sup>*Channing Division of Network Medicine, Department of Medicine, Brigham and Women's Hospital and*

*Harvard Medical School, Boston, MA 02115, USA;*

<sup>16</sup>*Division of Cancer Control and Population Sciences, University of Pittsburgh Cancer Institute,*

*Pittsburgh, PA, USA.*

<sup>17</sup>*Department of Epidemiology, University of Pittsburgh Graduate School of Public Health, Pittsburgh, PA,*

*USA.*

<sup>18</sup>*Duke-NUS Medical School, Singapore, Singapore.*

<sup>19</sup>*Tulane University Obesity Research Center, School of Public Health and Tropical Medicine, Tulane*

*University, 1440 Canal Street, Suite 1724 New Orleans, LA 70112;*

Registration: [www.clinicaltrials.gov](http://www.clinicaltrials.gov). Registration ID: NCT03348566

**Running title:** Genetic adaptation, fish, and weight change

**Word count:** 3420

**\*Correspondence and requests for reprint:**

Dr. Tao Huang. Department of Epidemiology and Biostatistics, School of Public Health, Peking University,

Beijing, China. Email: [huangtao@bjmu.edu.cn](mailto:huangtao@bjmu.edu.cn)

Dr. Lu Qi. Department of Epidemiology, School of Public Health and Tropical Medicine, Tulane

University. 1440 Canal Street, Suite 1724, New Orleans, LA 70112

Telephone: 504-988-3549;

Email: [lqi1@tulane.edu](mailto:lqi1@tulane.edu); [luqi@hsph.harvard.edu](mailto:luqi@hsph.harvard.edu)

## 1 Abstract

2 **Objective:** We tested whether genetic variants near fatty acid desaturases gene (*FADS*) cluster, which  
3 were recently identified to be signatures of adaptation to fish- and n-3 PUFAs-rich diet, interacted with  
4 these dietary factors on change in body mass index (BMI).

5 **Design:** Three *FADS* variants were examined for gene-diet interactions on long-term (~10 years) changes  
6 in BMI and body weight were tested in three prospective cohort studies.

7 **Setting:** Population based study

8 **Participants:** 11,323 women from the Nurses' Health Study (NHS), 6,833 men from the Health  
9 Professionals Follow-up Study (HPFS), and replicated in 6,254 women from the Women's Health  
10 Initiative (WHI), and 5,264 Chinese from the Singapore Chinese Health Study (SCHS).

11 **Main outcomes:** Long-term (~10 years) changes in BMI and body weight

12 **Results:** In the NHS and HPFS cohorts, food-sourced n-3 PUFAs intake showed interactions with the  
13 *FADS* rs174570 on changes of BMI (P for interaction = 0.02 in NHS, 0.05 in HPFS, and 0.007 in  
14 combined). Such interactions were replicated in two independent cohorts WHI and SCHS (P for  
15 interaction = 0.04 in WHI, 0.02 in SCHS, and 0.001 in combined). The genetic associations of the *FADS*  
16 rs174570 with changes in BMI increased across the tertiles of n-3 PUFAs in all the cohorts. Fish intake  
17 also accentuated the genetic associations of the *FADS* rs174570 with long-term changes in BMI (pooled P  
18 for interaction = 0.006). Viewed differently, long chain n-3 PUFAs intake showed stronger association  
19 with long-term changes in BMI among the rs174570 T carriers (beta = 0.79 kg/m<sup>2</sup> per g, P = 3×10<sup>-5</sup>) than  
20 the rs174570 non-T carriers (beta=0.16 kg/m<sup>2</sup> per g, P = 0.08). Similar results were observed for fish  
21 intake.

22 **Conclusions:** Our analyses provide replicable evidence that long chain n-3 PUFAs and fish intakes may  
23 interact with the *FADS* variant on long-term weight gain.

## 24 Article summary

### 25 Strengths and limitations of this study

- 1  
2  
3 27 • This is the first study with consistent results from 4 well-established prospective cohorts of different  
4  
5 28 racial populations such as Caucasians with European ancestry and Singapore Chinese.  
6  
7 29 • The consistent results from these independent cohorts demonstrated the robustness of our findings.  
8  
9 30 • Unlike cross-sectional studies, our prospective analysis minimized the potential reverse causa.  
10  
11  
12 31

## 13 14 32 **Introduction**

15  
16 33 Diet rich in fish and marine fatty acids especially long chain n-3 polyunsaturated fatty acids (PUFAs) has  
17  
18 34 shown beneficial effects on cardiometabolic health (1, 2), however, data from population studies on the  
19  
20 35 associations between such diet and body weight are inconsistent (3, 4). Emerging evidence suggests genetic  
21  
22 36 variations may play a role in modifying the relation between dietary factors and body weight (5-7).  
23  
24 37

25  
26 38 A recent study of Inuit identified genetic signatures of adaptation to diets rich in fish and n-3 PUFAs. The  
27  
28 39 strong signals locate in a cluster of fatty acid desaturases gene (*FADS*) that determine PUFAs levels (8).  
29  
30 40 People living in the Arctic region have been found to be genetically prone to develop obesity (9, 10) as  
31  
32 41 survival strength for energy storage(11, 12). Interestingly, the identified *FADS* genetic signatures of diet  
33  
34 42 adaptation have been also related to adiposity in the Inuit population (8). Of note, due to long-standing  
35  
36 43 selection pressure, the identified *FADS* signatures differ in frequency of selective allele across various  
37  
38 44 populations such as Europeans and Asians (13), in coincidence with varying levels of fish/marine fatty  
39  
40 45 acids consumption, and adiposity patterns in these populations (14). We therefore hypothesized that the  
41  
42 46 genetic signatures might interact with fish and marine PUFAs intakes on body weight (13).  
43  
44 47

45  
46 47  
47 48 The present study tested the interactions between n-3 PUFA and fish intakes and variants in *FADS* gene  
48  
49 49 cluster, genetic signatures of adaptation to fish- and n-3 PUFAs-rich diet, in relation to long-term changes in  
50  
51 50 body mass index (BMI) in two US prospective cohorts: the Nurses' Health Study (NHS) and the Health  
52  
53 51 Professionals Follow-up Study (HPFS). We replicated the findings in two independent, prospective cohorts  
54  
55 52 the Women's Health Initiative (WHI) and the Singapore Chinese Health Study (SCHS).  
56  
57  
58  
59  
60

1  
2  
3 53  
45 54 **Methods**6  
7 55 **Discovery cohorts**8  
9 56 *The Nurses' Health Study*

10  
11 57 The NHS began in 1976, when 121,700 female registered nurses aged 30-55 y residing in 11 states were  
12  
13 58 recruited to complete a baseline questionnaire about their lifestyle and medical history (15). The current  
14  
15 59 analysis baseline was set in 1990 for the NHS. We included 11,323 women of European ancestry. Informed  
16  
17 60 consent was obtained from all participants. The DNA extraction methods, quality control measures, SNPs  
18  
19 61 genotyping and imputation when performed have been described in detail elsewhere (16-22). All  
20  
21 62 participants with genotyping data available based on previous GWASs were included (16-21). The study  
22  
23 63 protocol was approved by the institutional review boards of Brigham and Women's Hospital and Harvard  
24  
25 64 School of Public Health.

26  
27  
28 65  
2930 66 *The Health Professionals Follow-up Study*

31  
32 67 The HPFS was initiated in 1986, and was composed of 51,529 male dentists, pharmacists, veterinarians,  
33  
34 68 optometrists, osteopathic physicians, and podiatrists, aged 40-75 y at baseline. The male participants  
35  
36 69 returned a baseline questionnaire about detailed medical history, lifestyle, and usual diet (23). In the current  
37  
38 70 analysis, we used 1990 as baseline in the HPFS, when the earliest complete dietary data were collected. Our  
39  
40 71 analysis included 6,833 men whose genotype data were available. Informed consent was obtained from all  
41  
42 72 participants. The DNA extraction methods, quality control measures, SNPs genotyping and imputation  
43  
44 73 when performed have been described in detail elsewhere (16-22). All participants with genotyping data  
45  
46 74 available based on previous GWASs were included (16-21). The study protocol was approved by the  
47  
48 75 institutional review boards of Brigham and Women's Hospital and Harvard School of Public Health.

49  
50  
51 76  
5253 77 **Replication cohorts**54 78 *The Women's Health Initiative (WHI)*  
55  
56  
57  
58  
59  
60



1  
2  
3 79 The Women's Health Initiative (WHI) is a large, multiethnic, 40-center study funded by the National Heart,  
4  
5 80 Lung, and Blood Institute (NHLBI) that focuses on strategies for preventing heart disease, breast and  
6  
7 81 colorectal cancer, and osteoporotic fractures in postmenopausal women. A full description of the WHI study  
8  
9 82 is presented elsewhere (24, 25). For the analyses, we included 6,254 Caucasians women with European  
10  
11 83 ancestry who participated in the WHI clinical trial studies at baseline (1994-1998) and at sixth-year  
12  
13 84 follow-up and for whom DNA was measured. The genomic DNA samples were processed according to  
14  
15 85 standard Affymetrix procedures for processing of the assay. The Affymetrix Human SNP Array 6.0  
16  
17 86 (Affymetrix®, Inc Santa Clara, CA) was used for genome wide SNP genotyping. Human subjects review  
18  
19 87 committees at each participating institution reviewed and approved the study, and all women gave written  
20  
21 88 informed consent.  
22  
23  
24  
25

### 26 90 ***The Singapore Chinese Health Study (SCHS) cohort***

27  
28 91 The design of Singapore Chinese Health Study (SCHS) has been previously described in detail (26).  
29  
30 92 Briefly, between 1993 and 1998, 63,257 Chinese men and women between ages of 45 and 74 years living in  
31  
32 93 Singapore were enrolled into the cohort study (27). Two follow-up interviews were conducted via  
33  
34 94 telephone among surviving participants between 1999 and 2004, and again between 2006 and 2010 to  
35  
36 95 update information on body weight, selected lifestyle factors and medical history. All participants have  
37  
38 96 given informed consent. The study was approved by the Institutional Review Boards of the National  
39  
40 97 University of Singapore and the University of Pittsburgh, and the study was carried out in accordance with  
41  
42 98 the approved guidelines. Genome-wide genotyping for 2615 incident diabetes cases and 2615 matched  
43  
44 99 controls was performed at the Genome Institute of Singapore according to the manufacturer's  
45  
46 100 recommendations using an Affymetrix ASI (Asian) Axiom array. Genotype calling was performed by the  
47  
48 101 Affymetrix Corporation (28). Genome-wide genotyping for 717 incident myocardial infarction (MI) cases  
49  
50 102 and 644 controls was performed for SCHS samples using the Illumina HumanOmni ZhongHua-8 Bead Chip  
51  
52  
53 103 (29).  
54  
55  
56  
57  
58  
59  
60

1  
2  
3 104 Among these two case-control studies nested within the cohort, 5,264 subjects with genotyping data had  
4  
5 105 both weight reported at both baseline and follow-up 2 interviews, and were included in this analysis.  
6

7 106

### 9 107 **Assessment of measures of body mass index**

11 108 Height and body weight were assessed by questionnaire at baseline, and weight information was requested  
12  
13 109 on follow-up questionnaire in all 4 cohorts. Self-reported weights were highly correlated with directly  
14  
15 110 measured values ( $r=0.97$  in HPFS and NHS) in a validation study (30). BMI was calculated as body weight  
16  
17 111 (kg)/height ( $m^2$ ). We defined long-term changes in BMI as changes in BMI from 1990 to 2000 in the NHS  
18  
19 112 and HPFS cohorts (31), and from baseline (1993) to sixth year follow-up in the WHI (24, 25), and from  
20  
21 113 baseline (1998) to second follow-up (2004) in the SCHS.  
22  
23

24 114

### 26 115 **Assessment of diets and other covariates**

28 116 Questionnaires were used to collect information on a medical history and diet/lifestyle factors in all 4  
29  
30 117 cohorts. Total fish, n-3 PUFAs, supplemental use of fish oil, alcohol, sugar sweetened beverages, fried  
31  
32 118 food intakes, and other dietary factors at baseline were assessed by validated food frequency questionnaires  
33  
34 119 (FFQ) in the NHS and HPFS (32, 33). A 165-item validated semi-quantitative FFQ was used to collect  
35  
36 120 dietary data and supplemental use of fish oil in the SCHS (27). Dietary data and supplemental use of fish  
37  
38 121 oil were obtained from a self-administered baseline 122-items validated FFQ in the WHI (34). Alternate  
39  
40 122 health eating index was previously calculated in the NHS, HPFS (35), WHI, and SCHS respectively.  
41  
42 123 Physical activity was expressed as metabolic equivalents per week by incorporating the reported time spent  
43  
44 124 on various activities, and the intensity level of each activity. The validity of the self-reported physical  
45  
46 125 activity data has been described previously in the NHS and HPFS (36). In the WHI, an estimated metabolic  
47  
48 126 equivalent (MET) level for each type of activity was assigned from a compendium of activities  
49  
50 127 (37). Physical activity was assessed using eight continuous categories ranging from never to 31 hours or  
51  
52 128 more in an average week spent doing strenuous sports; vigorous work; and moderate activities in the  
53  
54 129 SCHS (26).  
55  
56  
57  
58  
59  
60

130

### 131 **The *FADS* variants selection and genotyping**

132 Three of the 6 *FADS* single-nucleotide polymorphisms (SNPs) reported in a recent scan of Inuit genomes  
133 for signatures of adaptation (8) were derived from genome-wide scans available in the NHS, HPFS. We  
134 assumed that each SNP in the panel acts independently in an additive manner. We coded the SNPs as  
135 following: rs174570 (TT=2, TC=1, CC=0); rs174602 (TT=2, TC=1, CC=0); rs7115739 (TT=2, TG=1,  
136 GG=0). The *FADS* rs174570 was extracted from GWAS data in the WHI and SCHS cohorts for replication  
137 (Supplemental Table 1).

138

### 139 **Patient and Public Involvement**

140 patients and or public were not involved.

141

### 142 **Statistical analyses**

143 We examined the associations of the *FADS* variants (rs174570, rs174602, rs7115739) with adiposity  
144 measures and long-term changes in BMI using general linear models. Interactions between the *FADS*  
145 variants (rs174570, rs174602, rs7115739) and baseline fish intake, and total or food-sourced long chain n-3  
146 PUFAs intakes on long-term changes in BMI were tested by including a multiplicative interaction term in  
147 the models in the NHS and HPFS. The significant results for rs174570 were replicated in the WHI and  
148 SCHS. Potential confounders considered in multivariable models were age, baseline physical activity,  
149 baseline television watching, baseline smoking, baseline alcohol intake, baseline alternate healthy eating  
150 index, and baseline total energy intake, sugar sweetened beverages (if available), fried food intake (if  
151 available). We further tested the genetic associations with long-term changes in BMI according to long  
152 chain n-3 PUFAs and fish intakes, and associations of long chain n-3 PUFAs and fish intakes with long-term  
153 changes in BMI according to the *FADS* genotypes using general linear models after adjustment of potential  
154 confounders. Results across cohorts were pooled with inverse variance weighted meta-analyses by fixed  
155 effects models (if  $P \geq 0.05$  for heterogeneity between studies) or random effects models (if  $P < 0.05$  for

1  
2  
3 156 heterogeneity between studies). All reported P values are nominal and two sided. Statistical analyses were  
4  
5 157 performed in SAS 9.3 (SAS Institute, Cary, NC, USA).  
6

7 158

## 9 159 **Results**

### 11 160 **Baseline characteristics of all participants in the NHS, HPFS, WHI and SCHS cohorts**

13 161 **Table 1** shows the baseline characteristics for all participants in the NHS, HPFS, WHI, and SCHS cohorts.

15 162 The present study included 11,323 women with genetic data from the NHS cohort, 6,833 men with genetic  
17 163 data from the HPFS cohort, 6,254 women from the WHI, and 5,264 Chinese from the SCHS. The  
19 164 distribution of the *FADS* genetic variants in the 4 cohorts was shown in **Supplemental table 1**. We did not  
21 165 observe any significant genetic association between the *FADS* rs174570 genotype and baseline BMI, BMI  
23 166 at endpoint, and long-term changes in BMI in three US cohorts ( $P > 0.05$ ), however, we found that the  
25 167 *FADS* genotype was significantly associated with baseline BMI in the SCHS ( $P = 0.002$ ) (**Supplemental**  
27 168 **table 2**).  
29

30 169

### 32 170 **Genetic associations with long-term changes in BMI according to LC n-3 PUFAs/fish intakes**

34 171 We first tested interactions between the *FADS* genetic variants (rs174570, rs174602, rs7115739) and intakes  
36 172 of various sourced long chain n-3 PUFAs and fish in the NHS and HPFS cohorts. We found that only *FADS*  
38 173 rs174570 (C/T, with T as the common allele in Inuit, but rare allele in Europeans and Asians) showed  
40 174 significant interaction with LC n-3 PUFAs/fish intakes. Food-sourced n-3 PUFAs (Eicosapentaenoic acid  
42 175 (EPA) + Docosahexaenoic acid (DHA)) intake consistently magnified the genetic association with  
44 176 long-term changes in BMI ( $P$  for interaction = 0.02 in NHS, 0.05 in HPFS, and 0.007 in combined cohorts)  
46 177 (**Figure 1**). We successfully replicated our results in the WHI cohort ( $P$  for interaction = 0.04) and the  
48 178 SCHS cohort ( $P$  for interaction = 0.02).  
50

51 179

53 180 The pooled analyses of the 3 US (Caucasian) populations or all 4 cohorts showed that high intakes of  
55 181 food-sourced n-3 PUFAs intake ( $P$  for interaction = 0.008 and 0.009, respectively) significantly

1  
2  
3 182 accentuated the genetic association of the *FADS* genotypes with long-term changes in BMI (**Figure 2**). No  
4  
5 183 significant heterogeneity in the interaction effect was observed among these cohorts. Differences in  
6  
7 184 long-term changes of BMI per T allele were -0.105 (SE 0.067), 0.027 (SE 0.064), and 0.120 (SE 0.067)  
8  
9 185 kg/m<sup>2</sup> across three tertiles of food-sourced n-3 PUFAs in pooled results from all the 4 cohorts.

10  
11 186  
12  
13 187 Individual food-sourced n-3 PUFAs such as EPA (pooled P for interaction=0.01) and DHA (pooled P for  
14  
15 188 interaction=0.003) showed similar interaction patterns; and the interactions remained significant when  
16  
17 189 supplemented n-3 PUFAs were considered (pooled P for interaction=0.007) (**Figure 2**).

18  
19  
20 190  
21  
22 191 In addition, fish intake showed similar, though less significant, interaction patterns with the *FADS*  
23  
24 192 genotype on long-term changes in BMI in the NHS (P for interaction=0.16), HPFS (P for  
25  
26 193 interaction=0.09), WHI (P for interaction=0.09), SCHS (P for interaction=0.03) and combined results  
27  
28 194 (pooled P for interaction=0.006), and the differences in BMI changes per T allele were -0.096 (SE 0.071),  
29  
30 195 0.041 (SE 0.052), and 0.251 (SE 0.151) kg/m<sup>2</sup> across three categories ( $\leq 1$  serving/week, 1~6  
31  
32 196 servings/week, and  $\geq 1$  serving/day) of fish intake in combined results from all the 4 cohorts.

33  
34  
35 197  
36  
37 198 In addition, we did not observe significant interaction between two other genetic variants in *FADS* cluster  
38  
39 199 (rs174602 and rs7115739) and long chain n-3 PUFAs/fish intakes in relation to long-term changes in BMI  
40  
41 200 in the NHS and HPFS cohorts. Similar interactions for long-term changes in body weight were observed  
42  
43 201 (**Supplemental table 3 & 4**).

### 202 203 **Long chain n-3 PUFAs/fish intakes and long-term changes in BMI according to the *FADS* genotype**

204 We found that individuals who consumed the highest food-sourced n-3 PUFAs (EPA+DHA; T3) had  
205 significantly greater increase of BMI (mean  $\pm$  SE = 0.74 $\pm$ 0.06, kg/m<sup>2</sup>) than did those who consumed the  
206 lowest (T1) (mean  $\pm$  SE = 0.39 $\pm$ 0.07, kg/m<sup>2</sup>) among the T allele carriers, whereas the corresponding BMI  
207 changes were 0.68 $\pm$ 0.03 kg/m<sup>2</sup> and 0.49 $\pm$ 0.03 kg/m<sup>2</sup>, respectively, among the non-T carriers in 4 cohorts

1  
2  
3 208 combined (**Table 2 & Supplemental table 5** ). Similarly, we observed different associations between fish  
4  
5 209 intake and BMI changes among the T allele carriers ( $P = 1.5 \times 10^{-6}$ ) and non-carriers ( $P = 0.01$ ) in the  
6  
7 210 pooled results from these US cohorts. No significant heterogeneity in the interaction effect was observed  
8  
9 211 among the cohorts.  
10

11  
12 212  
13 213 **Figure 3** presents the predicted long-term changes in BMI from food-sourced n-3 PUFAs and fish intake  
14  
15 214 according to the T carriers and the non-T carriers. Results from the NHS, HPFS and WHI cohorts  
16  
17 215 consistently showed that the associations of food-sourced n-3 PUFAs and fish intakes with long-term  
18  
19 216 changes in BMI were stronger among the T carriers than those among the non-T carriers. In the pooled  
20  
21 217 results, the beta  $\pm$  SE for associations of food-sourced n-3 PUFAs (**Figure 3**) and fish intake (**Figure 4**)  
22  
23 218 with long-term changes in BMI were  $0.79 \pm 0.19$  kg/m<sup>2</sup> per g ( $P = 0.000003$ ) and  $0.64 \pm 0.16$  kg/m<sup>2</sup> per  
24  
25 219 serving ( $P = 0.00002$ ) among the T carriers, and whereas the corresponding beta  $\pm$  SE were  $0.16 \pm 0.10$   
26  
27 220 kg/m<sup>2</sup> per g ( $P = 0.08$ ) and  $0.18 \pm 0.08$  kg/m<sup>2</sup> per serving ( $P = 0.01$ ) among the non-T carriers.  
28  
29  
30  
31 221

## 32 222 **Discussion**

33  
34 223 In 4 large prospective cohorts of the US and Chinese populations, we found reproducible evidence that long  
35  
36 224 chain n-3 PUFAs and fish intakes accentuated the genetic association of the *FADS* genotypes with  
37  
38 225 long-term changes in BMI. In addition, our results showed that the *FADS* rs174570 T allele carriers gained  
39  
40 226 more weight than the non-carriers when they had higher long chain n-3 PUFAs and fish intakes.  
41  
42  
43 227

44  
45 228 Compelling evidence has shown that fish- and long chain n-3 PUFAs-rich diet are beneficial on  
46  
47 229 improvement of cardiometabolic health (1, 2). However, large prospective cohort studies examining the  
48  
49 230 associations of fish or n-3 PUFAs with body weight and obesity risk generated conflicting results (3, 4).  
50  
51 231 In addition, several randomized controlled trials (RCTs) supported the protective effects of fish, fish oils,  
52  
53 232 or/and n-3 PUFAs intake on weight-loss (38-40), but the benefit was not evident in other trials (41-43). The  
54  
55  
56  
57  
58  
59  
60

1  
2  
3 233 results from the current study lent support to our hypothesis that the heterogeneous associations between  
4  
5 234 fish or n-3 PUFAs and body weight might be at least partly due to gene-diet interactions.  
6

7 235  
8  
9 236 We found that the genetic associations between the *FADS* rs174570 and long-term BMI change were  
10  
11 237 stronger along with increasing intakes of long chain n-3 PUFAs and fish. Viewed from a different angle,  
12  
13 238 the magnitude of associations of fish and long chain n-3 PUFAs intakes with BMI changes varied among  
14  
15 239 individuals with different genotypes. The *FADS* rs174570 was recently identified from a study of the Inuit,  
16  
17 240 who had high fish/n-3 PUFAs intakes (8). The high frequency of T allele in Inuit reflects genetic adaptation  
18  
19 241 to the special fish- and n-3 PUFA rich diet. Interestingly, the identified *FADS* genetic signatures of diet  
20  
21 242 adaptation have been also related to adiposity in this population. Our data indicated that the signature allele  
22  
23 243 (T) was related differently with weight changes (decrease or increase), depending on the levels of fish/n-3  
24  
25 244 PUFAs intakes. In people with high fish/n-3 PUFAs intakes, carrying the signature allele predisposed to  
26  
27 245 greater weight gain and an increased risk of obesity; while carriers of this allele tended to have less body  
28  
29 246 weight when they are exposed to diet low in fish and n-3 PUFAs.  
30  
31

32 247  
33  
34 248 We found that individual food-sourced n-3 PUFAs such as EPA and DHA showed similar interaction  
35  
36 249 patterns in relation to long-term changes in BMI; and the interactions also remained significant when  
37  
38 250 supplemented n-3 PUFAs were considered. In addition, our results indicated that the interactions of  
39  
40 251 fish/n-3 PUFAs intakes and the *FADS* genotype were persistent across different racial populations such as  
41  
42 252 Europeans and Asians. Our data suggest that the interactions between n-3 PUFAs and the *FADS* genotype is  
43  
44 253 robust for fatty acids from various sources.  
45  
46

47 254  
48  
49 255 The mechanisms underlying the observed gene-diet interactions remain unclear, however, such  
50  
51 256 interactions are biologically plausible. It has long been known that the *FADS* genes such as  
52  
53 257 *FADS1* and *FADS2* encode delta-5 and delta-6 desaturases respectively, which are the important  
54  
55 258 rate-limiting steps in the endogenous formation of long-chain PUFA such as EPA and DHA from linoleic  
56  
57  
58  
59  
60

1  
2  
3 259 acid (n-6) and  $\alpha$ -linolenic acid (n-3) (44). The selected allele of *FADS* rs174570 is significantly associated  
4  
5 260 with an increase in the concentration of n-3 fatty acids upstream in the n-3 synthesis pathway (44). In  
6  
7 261 addition, it has been reported that dietary n-3 PUFAs might regulate adipocyte *FADS* expression and  
8  
9 262 function (45). In addition, storage of energy and body fat is very important for the Arctic population, who  
10  
11 263 are regularly exposed to the extreme low temperature and fishes rich in n-3 PUFAs (11, 12). Under natural  
12  
13 264 selection, these people are genetically prone to high fish intake to keep body fat (9, 10). Therefore, it's not  
14  
15 265 surprising that high fish or n-3 PUFAs intake accentuated genetic susceptibility to obesity among people  
16  
17 266 carrying selective *FADS* signature (46, 47). Our findings support the view that extra n-3 PUFAs may not  
18  
19 267 do much benefit at all for Europeans with selective *FADS* signature(8, 13).  
20  
21

## 22 268 **Strengths**

23  
24 269 Several strengths of this study merit mention. To our knowledge, this is the first study with consistent results  
25  
26 270 from 4 well-established prospective cohorts of different racial populations such as Caucasians with  
27  
28 271 European ancestry and Singapore Chinese. The consistent results from these independent cohorts  
29  
30 272 demonstrated the robustness of our findings. Other major strengths include the prospective design, the large  
31  
32 273 sample size, use of long-term change of BMI, and replication of the results. Unlike cross-sectional studies,  
33  
34 274 our prospective analysis minimized the potential reverse causality (48).  
35  
36

## 37 275 **Limitations**

38  
39 276 However, several limitations need to be acknowledged. First, dietary fatty acids, fish, and adiposity  
40  
41 277 measures were self-reported, measurement errors in these variables are inevitable; however, the food  
42  
43 278 frequency questionnaires and adiposity measures data have been well validated (27, 30, 32-34). Second,  
44  
45 279 confounding by other unmeasured or unknown factors might exist, although we have carefully adjusted for  
46  
47 280 multiple dietary and lifestyle factors. Third, a causal relation among long chain n-3 PUFAs and fish  
48  
49 281 consumption, and adiposity cannot be inferred from an observational study. Fourth, all subjects with genetic  
50  
51 282 data were selected in each cohort. The source of genotyping data was diverse (e.g. sub-cohort, case control  
52  
53 283 studies), therefore, subject selection might be a major source of bias. Fifth, we acknowledge that the  
54  
55 284 different methods in measuring anthropometric traits, genetic variants and food intake across cohorts might  
56  
57  
58  
59  
60



1  
2  
3 285 introduce bias in the present analyses. Finally, the participants included in our study were middle aged and  
4  
5 286 older adults of Caucasians with European ancestry in the US and Chinese in Singapore, and it is unknown  
6  
7 287 whether our findings could be generalized to other demographic or ethnic groups.  
8

### 9 288 **Conclusions**

10  
11 289 In summary, our data provides reproducible evidence from 4 multiethnic cohorts that high long chain n-3  
12  
13 290 PUFAs and fish intakes accentuate the genetic association of the *FADS* with adiposity. These findings  
14  
15 291 emphasize the importance of considering precision nutritional interventions on prevention and treatment  
16  
17 292 of obesity.  
18  
19

20 293  
21  
22 294 **Contributors:** TH and LQ designed the study and wrote the first draft. TH analyzed the data. FBH  
23  
24 295 provided statistical expertise. TW, YH, DS, LH, CSF, JW, LRP, AT, GC, IDV, HKC, JF, XS, CCK, YF, RM,  
25  
26 296 HCK, JY, KWP, and LQ were involved in data collection. TH and LQ are guarantors. All authors  
27  
28 297 contributed to the interpretation of the results and critical revision of the manuscript for important  
29  
30 298 intellectual content and approved the final version of the manuscript.

31  
32 299 We acknowledge Dr. Gary C. Curhan's contribution to the genetic data.  
33  
34

35 300

### 36 301 **Funding**

37  
38  
39 302 This study was supported by grants HL126024, HL034594, DK100383, DK091718, HL071981,  
40  
41 303 HL073168, CA87969, CA49449, CA055075, HL34594, HL088521, U01HG004399, DK080140,  
42  
43 304 P30DK46200, U01CA137088, U54CA155626, DK58845, DK098311, U01HG004728, EY015473,  
44  
45 305 CA134958, DK70756 and DK46200 from the National Institutes of Health, with additional support for  
46  
47 306 genotyping from Merck Research Laboratories, North Wales, PA. LQ is a recipient of the American Heart  
48  
49 307 Association Scientist Development Award (0730094N). LRP is supported by the Arthur Ashley Williams  
50  
51 308 Foundation and a Harvard Ophthalmology Scholar Award (Harvard Medical School) from the Harvard  
52  
53 309 Glaucoma Center of Excellence. ATC is a Damon Runyon Cancer Foundation Clinical Investigator. The  
54  
55 310 SCHS study is supported by the National Institutes of Health, USA (NCI R01 CA144034, UM1

1  
2  
3 311 CA182876, R01 DK080720), the Singapore National Medical Research Council (NMRC 1270/2010), the  
4  
5 312 HUI-CREATE Programme of the National Research Foundation, Singapore (Project Number 370062002)  
6  
7 313 and Biomedical Research Council, Singapore. The funding sources had no role in the design or conduct of  
8  
9 314 the study; collection, management, analysis, and interpretation of the data; or preparation, review, or  
10  
11 315 approval of the manuscript.  
12

13 316  
14  
15 317 **Declaration of interests:** All authors have no conflict of interest to declare. No support from any  
16  
17 318 organization for the submitted work; no financial relationships with any organizations that might have an  
18  
19 319 interest in the submitted work in the previous three years, no other relationship or activity that could  
20  
21 320 appear to have influenced the submitted work.  
22  
23  
24  
25  
26  
27  
28  
29  
30  
31  
32  
33  
34  
35  
36  
37  
38  
39  
40  
41  
42  
43  
44  
45  
46  
47  
48  
49  
50  
51  
52  
53  
54  
55  
56  
57  
58  
59  
60

## References

1. Del Gobbo LC, Imamura F, Aslibekyan S, Marklund M, Virtanen JK, Wennberg M, Yakoob MY, Chiuve SE, Dela Cruz L, Frazier-Wood AC, et al. omega-3 Polyunsaturated Fatty Acid Biomarkers and Coronary Heart Disease: Pooling Project of 19 Cohort Studies. *JAMA internal medicine* 2016;176(8):1155-66. doi: 10.1001/jamainternmed.2016.2925.
2. Hu FB, Bronner L, Willett WC, Stampfer MJ, Rexrode KM, Albert CM, Hunter D, Manson JE. Fish and omega-3 fatty acid intake and risk of coronary heart disease in women. *Jama* 2002;287(14):1815-21.
3. He K, Rimm EB, Merchant A, Rosner BA, Stampfer MJ, Willett WC, Ascherio A. Fish consumption and risk of stroke in men. *Jama* 2002;288(24):3130-6.
4. Iso H, Rexrode KM, Stampfer MJ, Manson JE, Colditz GA, Speizer FE, Hennekens CH, Willett WC. Intake of fish and omega-3 fatty acids and risk of stroke in women. *Jama* 2001;285(3):304-12.
5. Qi L, Cho YA. Gene-environment interaction and obesity. *Nutrition reviews* 2008;66(12):684-94. doi: 10.1111/j.1753-4887.2008.00128.x.
6. Qi Q, Chu AY, Kang JH, Huang J, Rose LM, Jensen MK, Liang L, Curhan GC, Pasquale LR, Wiggs JL, et al. Fried food consumption, genetic risk, and body mass index: gene-diet interaction analysis in three US cohort studies. *BMJ* 2014;348:g1610. doi: 10.1136/bmj.g1610.
7. Qi Q, Chu AY, Kang JH, Jensen MK, Curhan GC, Pasquale LR, Ridker PM, Hunter DJ, Willett WC, Rimm EB, et al. Sugar-sweetened beverages and genetic risk of obesity. *The New England journal of medicine* 2012;367(15):1387-96. doi: 10.1056/NEJMoa1203039.
8. Fumagalli M, Moltke I, Grarup N, Racimo F, Bjerregaard P, Jorgensen ME, Korneliusen TS, Gerbault P, Skotte L, Linneberg A, et al. Greenlandic Inuit show genetic signatures of diet and climate adaptation. *Science* 2015;349(6254):1343-7. doi: 10.1126/science.aab2319.
9. Hegele RA, Anderson C, Young TK, Connelly PW. G-protein beta3 subunit gene splice variant and body fat distribution in Nunavut Inuit. *Genome research* 1999;9(10):972-7.
10. Hegele RA, Huff MW, Young TK. Common genomic variation in LMNA modulates indexes of obesity in Inuit. *The Journal of clinical endocrinology and metabolism* 2001;86(6):2747-51. doi: 10.1210/jcem.86.6.7550.
11. Jorgensen ME, Bjerregaard P, Borch-Johnsen K. Diabetes and impaired glucose tolerance among the inuit population of Greenland. *Diabetes Care* 2002;25(10):1766-71.
12. Jorgensen ME, Glumer C, Bjerregaard P, Gyntelberg F, Jorgensen T, Borch-Johnsen K. Obesity and central fat pattern among Greenland Inuit and a general population of Denmark (Inter99): relationship to metabolic risk factors. *International journal of obesity and related metabolic disorders : journal of the International Association for the Study of Obesity* 2003;27(12):1507-15. doi: 10.1038/sj.ijo.0802434.
13. Tishkoff S. GENETICS. Strength in small numbers. *Science* 2015;349(6254):1282-3. doi: 10.1126/science.aad0584
14. Dewailly E, Blanchet C, Lemieux S, Sauve L, Gingras S, Ayotte P, Holub BJ. n-3 Fatty acids and cardiovascular disease risk factors among the Inuit of Nunavik. *The American journal of clinical nutrition* 2001;74(4):464-73.
15. Colditz GA, Manson JE, Hankinson SE. The Nurses' Health Study: 20-year contribution to the understanding of health among women. *Journal of women's health / the official publication of the Society for the Advancement of Women's Health Research* 1997;6(1):49-62.
16. Cornelis MC, Monda KL, Yu K, Paynter N, Azzato EM, Bennett SN, Berndt SI, Boerwinkle E, Chanock S, Chatterjee N, et al. Genome-wide meta-analysis identifies regions on 7p21 (AHR) and 15q24 (CYP1A2) as determinants of habitual caffeine consumption. *PLoS genetics* 2011;7(4):e1002033. doi: 10.1371/journal.pgen.1002033.
17. Jensen MK, Pers TH, Dworzynski P, Girman CJ, Brunak S, Rimm EB. Protein interaction-based genome-wide analysis of incident coronary heart disease. *Circulation Cardiovascular genetics* 2011;4(5):549-56. doi: 10.1161/CIRCGENETICS.111.960393.
18. Wiggs JL, Kang JH, Yaspan BL, Mirel DB, Laurie C, Crenshaw A, Brodeur W, Gogarten S, Olson LM, Abdrabou W, et al. Common variants near CAV1 and CAV2 are associated with primary open-angle glaucoma in Caucasians from the USA. *Human molecular genetics* 2011;20(23):4707-13. doi: 10.1093/hmg/ddr382.
19. Hunter DJ, Kraft P, Jacobs KB, Cox DG, Yeager M, Hankinson SE, Wacholder S, Wang Z, Welch R, Hutchinson

- 1  
2  
3 A, et al. A genome-wide association study identifies alleles in FGFR2 associated with risk of sporadic  
4 postmenopausal breast cancer. *Nature genetics* 2007;39(7):870-4. doi: 10.1038/ng2075.
- 5 20. Qi L, Cornelis MC, Kraft P, Stanya KJ, Linda Kao WH, Pankow JS, Dupuis J, Florez JC, Fox CS, Pare G, et al.  
6 Genetic variants at 2q24 are associated with susceptibility to type 2 diabetes. *Hum Mol Genet*  
7 2010;19(13):2706-15. doi: 10.1093/hmg/ddq156.
- 8 21. Kottgen A, Albrecht E, Teumer A, Vitart V, Krumsiek J, Hundertmark C, Pistis G, Ruggiero D, O'Seaghdha CM,  
9 Haller T, et al. Genome-wide association analyses identify 18 new loci associated with serum urate  
10 concentrations. *Nature genetics* 2013;45(2):145-54. doi: 10.1038/ng.2500.
- 11 22. Peters U, Jiao S, Schumacher FR, Hutter CM, Aragaki AK, Baron JA, Berndt SI, Bezieau S, Brenner H,  
12 Butterbach K, et al. Identification of Genetic Susceptibility Loci for Colorectal Tumors in a Genome-Wide  
13 Meta-analysis. *Gastroenterology* 2013;144(4):799-807 e24. doi: 10.1053/j.gastro.2012.12.020  
14 S0016-5085(12)01846-X [pii].
- 15 23. Rimm EB, Giovannucci EL, Willett WC, Colditz GA, Ascherio A, Rosner B, Stampfer MJ. Prospective study of  
16 alcohol consumption and risk of coronary disease in men. *Lancet* 1991;338(8765):464-8.
- 17 24. Anderson GL, Manson J, Wallace R, Lund B, Hall D, Davis S, Shumaker S, Wang CY, Stein E, Prentice RL.  
18 Implementation of the Women's Health Initiative study design. *Annals of epidemiology* 2003;13(9  
19 Suppl):S5-17.
- 20 25. Design of the Women's Health Initiative clinical trial and observational study. The Women's Health  
21 Initiative Study Group. *Controlled clinical trials* 1998;19(1):61-109.
- 22 26. Yuan JM, Stram DO, Arakawa K, Lee HP, Yu MC. Dietary cryptoxanthin and reduced risk of lung cancer: the  
23 Singapore Chinese Health Study. *Cancer epidemiology, biomarkers & prevention : a publication of the*  
24 *American Association for Cancer Research, cosponsored by the American Society of Preventive Oncology*  
25 2003;12(9):890-8.
- 26 27. Hankin JH, Stram DO, Arakawa K, Park S, Low SH, Lee HP, Yu MC. Singapore Chinese Health Study:  
27 development, validation, and calibration of the quantitative food frequency questionnaire. *Nutrition and*  
28 *cancer* 2001;39(2):187-95. doi: 10.1207/S15327914nc392\_5.
- 29 28. Chen Z, Pereira MA, Seielstad M, Koh WP, Tai ES, Teo YY, Liu J, Hsu C, Wang R, Odegaard AO, et al. Joint  
30 effects of known type 2 diabetes susceptibility loci in genome-wide association study of Singapore Chinese:  
31 the Singapore Chinese health study. *PLoS one* 2014;9(2):e87762. doi: 10.1371/journal.pone.0087762.
- 32 29. Dorajoo R, Sun Y, Han Y, Ke T, Burger A, Chang X, Low HQ, Guan W, Lemaitre RN, Khor CC, et al. A  
33 genome-wide association study of n-3 and n-6 plasma fatty acids in a Singaporean Chinese population.  
34 *Genes & nutrition* 2015;10(6):53. doi: 10.1007/s12263-015-0502-2.
- 35 30. Rimm EB, Stampfer MJ, Colditz GA, Chute CG, Litin LB, Willett WC. Validity of self-reported waist and hip  
36 circumferences in men and women. *Epidemiology* 1990;1(6):466-73.
- 37 31. Huang T, Zheng Y, Qi Q, Xu M, Ley SH, Li Y, Kang JH, Wiggs J, Pasquale LR, Chan AT, et al. DNA methylation  
38 variants at HIF3A locus, B vitamins intake, and long-term weight change: gene-diet interactions in two US  
39 cohorts. *Diabetes* 2015. doi: db150264 [pii]  
40 db15-0264 [pii]  
41 10.2337/db15-0264.
- 42 32. Willett WC, Sampson L, Stampfer MJ, Rosner B, Bain C, Witschi J, Hennekens CH, Speizer FE.  
43 Reproducibility and validity of a semiquantitative food frequency questionnaire. *Am J Epidemiol*  
44 1985;122(1):51-65.
- 45 33. Rimm EB, Giovannucci EL, Stampfer MJ, Colditz GA, Litin LB, Willett WC. Reproducibility and validity of an  
46 expanded self-administered semiquantitative food frequency questionnaire among male health  
47 professionals. *Am J Epidemiol* 1992;135(10):1114-26; discussion 27-36.
- 48 34. Patterson RE, Kristal AR, Tinker LF, Carter RA, Bolton MP, Agurs-Collins T. Measurement characteristics of  
49 the Women's Health Initiative food frequency questionnaire. *Annals of epidemiology* 1999;9(3):178-87.
- 50 35. Chiuve SE, Fung TT, Rimm EB, Hu FB, McCullough ML, Wang M, Stampfer MJ, Willett WC. Alternative  
51 dietary indices both strongly predict risk of chronic disease. *The Journal of nutrition* 2012;142(6):1009-18.  
52 doi: 10.3945/jn.111.157222  
53 jn.111.157222 [pii].
- 54 36. Wolf AM, Hunter DJ, Colditz GA, Manson JE, Stampfer MJ, Corsano KA, Rosner B, Kriska A, Willett WC.  
55 Reproducibility and validity of a self-administered physical activity questionnaire. *Int J Epidemiol*  
56  
57  
58  
59

- 1  
2  
3 1994;23(5):991-9.
- 4 37. Langer RD, White E, Lewis CE, Kotchen JM, Hendrix SL, Trevisan M. The Women's Health Initiative  
5 Observational Study: baseline characteristics of participants and reliability of baseline measures. *Annals of*  
6 *epidemiology* 2003;13(9 Suppl):S107-21.
- 7 38. Kabir M, Skurnik G, Naour N, Pechtner V, Meugnier E, Rome S, Quignard-Boulangue A, Vidal H, Slama G,  
8 Clement K, et al. Treatment for 2 mo with n 3 polyunsaturated fatty acids reduces adiposity and some  
9 atherogenic factors but does not improve insulin sensitivity in women with type 2 diabetes: a randomized  
10 controlled study. *The American journal of clinical nutrition* 2007;86(6):1670-9.
- 11 39. Munro IA, Garg ML. Prior supplementation with long chain omega-3 polyunsaturated fatty acids promotes  
12 weight loss in obese adults: a double-blinded randomised controlled trial. *Food & function* 2013;4(4):650-8.  
13 doi: 10.1039/c3fo60038f.
- 14 40. Thorsdottir I, Tomasson H, Gunnarsdottir I, Gisladdottir E, Kiely M, Parra MD, Bandarra NM, Schaafsma G,  
15 Martinez JA. Randomized trial of weight-loss-diets for young adults varying in fish and fish oil content. *Int J*  
16 *Obes (Lond)* 2007;31(10):1560-6. doi: 10.1038/sj.ijo.0803643.
- 17 41. Munro IA, Garg ML. Dietary supplementation with n-3 PUFA does not promote weight loss when combined  
18 with a very-low-energy diet. *The British journal of nutrition* 2012;108(8):1466-74. doi:  
19 10.1017/S0007114511006817.
- 20 42. Crochemore IC, Souza AF, de Souza AC, Rosado EL. omega-3 polyunsaturated fatty acid supplementation  
21 does not influence body composition, insulin resistance, and lipemia in women with type 2 diabetes and  
22 obesity. *Nutrition in clinical practice : official publication of the American Society for Parenteral and Enteral*  
23 *Nutrition* 2012;27(4):553-60. doi: 10.1177/0884533612444535.
- 24 43. Bender N, Portmann M, Heg Z, Hofmann K, Zwahlen M, Egger M. Fish or n3-PUFA intake and body  
25 composition: a systematic review and meta-analysis. *Obesity reviews : an official journal of the*  
26 *International Association for the Study of Obesity* 2014;15(8):657-65. doi: 10.1111/obr.12189.
- 27 44. Ameur A, Enroth S, Johansson A, Zaboli G, Igl W, Johansson AC, Rivas MA, Daly MJ, Schmitz G, Hicks AA, et  
28 al. Genetic adaptation of fatty-acid metabolism: a human-specific haplotype increasing the biosynthesis of  
29 long-chain omega-3 and omega-6 fatty acids. *Am J Hum Genet* 2012;90(5):809-20. doi:  
30 10.1016/j.ajhg.2012.03.014.
- 31 45. Ralston JC, Matravadia S, Gaudio N, Holloway GP, Mutch DM. Polyunsaturated fatty acid regulation of  
32 adipocyte FADS1 and FADS2 expression and function. *Obesity (Silver Spring)* 2015;23(4):725-8. doi:  
33 10.1002/oby.21035.
- 34 46. Smith GI, Julliard S, Reeds DN, Sinacore DR, Klein S, Mittendorfer B. Fish oil-derived n-3 PUFA therapy  
35 increases muscle mass and function in healthy older adults. *The American journal of clinical nutrition*  
36 2015;102(1):115-22. doi: 10.3945/ajcn.114.105833.
- 37 47. Jourdan C, Kloiber S, Nieters A, Seiler H, Himmerich H, Kohli MA, Lucae S, Wolfram G, Gieger C, Wichmann  
38 HE, et al. Gene-PUFA interactions and obesity risk. *The British journal of nutrition* 2011;106(8):1263-72. doi:  
39 10.1017/S0007114511001541.
- 40 48. Manolio TA, Bailey-Wilson JE, Collins FS. Genes, environment and the value of prospective cohort studies.  
41 *Nature reviews Genetics* 2006;7(10):812-20. doi: 10.1038/nrg1919.
- 42  
43  
44  
45  
46  
47  
48  
49  
50  
51  
52  
53  
54  
55  
56  
57  
58  
59

**Table 1 Baseline characteristics of all participants in the NHS, HPFS, WHI, and SCHS cohorts.**

|                                                | NHS <sup>1</sup> | HPFS          | WHI          | SCHS                     |
|------------------------------------------------|------------------|---------------|--------------|--------------------------|
|                                                | n=11,323         | n=6,833       | n=6,254      | n=5,264                  |
| Age (year)                                     | 57 ± 9           | 57 ± 11       | 68 ± 5       | 56 ± 7                   |
| Female (%)                                     | 100              | 0             | 100          | 58.7                     |
| Body weight (kg)                               | 70.1 ± 14.9      | 82.8 ± 12.5   | 73.7 ± 15.0  | 60.3 ± 9.8               |
| Body mass index (kg/m <sup>2</sup> )           | 26.2 ± 5.1       | 25.9 ± 3.3    | 28.3 ± 5.5   | 23.4 ± 3.3               |
| Alcohol consumption (g/day)                    | 5.14 ± 9.23      | 10.97 ± 15.05 | 6.00 ± 11.96 | 1.97 ± 8.02              |
| Physical activity (MET-h/week)                 | 19.3 ± 22.1      | 36.9 ± 39.5   | 11.6 ± 13.1  | 0.5 ± 1.0 <sup>2</sup>   |
| Television watching (h/week)                   | 17.5 ± 14.8      | 10.5 ± 8.2    | /            | 2.2 ± 0.8                |
| Current smokers (n, (%))                       | 1557(13.8)       | 493(7.3)      | 407(15.0)    | 1364(20.0)               |
| Total energy intake (kcal/day)                 | 1766 ± 502       | 1949 ± 578    | 1602 ± 654   | 1606 ± 573               |
| Alternative health eating index score          | 53.4 ± 10.8      | 53.8 ± 11.4   | 53.5 ± 10.6  | 55.8 ± 8.2               |
| Sugar sweetened beverage intake (servings/day) | 0.13 ± 0.39      | 0.23 ± 0.48   | 0.39 ± 0.82  | 0.69 ± 2.40 <sup>3</sup> |
| Total fried food (servings/day)                | 0.12 ± 0.20      | 0.22 ± 0.28   | /            | /                        |
| Fish intake (servings/day)                     | 0.31 ± 0.29      | 0.33 ± 0.30   | 0.23 ± 0.20  | 0.16 ± 0.07              |
| EPA (g/day)                                    | 0.08 ± 0.14      | 0.12 ± 0.20   | 0.04 ± 0.04  | /                        |
| DHA (g/day)                                    | 0.17 ± 0.14      | 0.22 ± 0.19   | 0.07 ± 0.07  | /                        |
| Food-sourced EPA+DHA (g/day)                   | 0.23 ± 0.19      | 0.31 ± 0.25   | 0.11 ± 0.10  | 0.33 ± 0.20              |
| Total EPA+DHA (g/day)                          | 0.26 ± 0.27      | 0.35 ± 0.37   | 0.38 ± 0.48  | /                        |

<sup>1</sup>Plus-minus values are means ± SD. <sup>2</sup>Hours per week of moderate activity in the SCHS. <sup>3</sup>Glasses per week of soda intake in the SCHS.

EPA: 20:5n-3; DHA: 22:6n-3; MET denotes metabolic equivalents.

The body-mass index (BMI) is the weight in kilograms divided by the square of the height in meters.

Data on BMI, long chain n-3 PUFAs and fish consumptions were assessed at baseline in the NHS (1990), the HPFS (1990), the WHI (1994-1998), and the SCHS (1993-1998), respectively. Television watching assessed in 1992 for Nurses' Health Study and in 1990 for Health Professionals Follow-Up Study.

**Table 2 Associations of long chain n-3 PUFAs and fish intakes with long-term changes in BMI according to *FADS* genotypes**

| Diets                       | <i>FADS</i> genotypes | Long chain n-3 PUFAs and fish intakes |            |            | P for trend          | P for interaction* |
|-----------------------------|-----------------------|---------------------------------------|------------|------------|----------------------|--------------------|
|                             |                       | Categories of diets                   |            |            |                      |                    |
| Total fish, serving/day     |                       | ≤1/wk                                 | 1~6/wk     | ≥1/d       |                      |                    |
| NHS                         | Non-T carriers        | 0.82±0.06                             | 0.98±0.04  | 1.15±0.13  | 0.006                | 0.03               |
|                             | T carriers            | 0.73±0.11                             | 0.95±0.08  | 1.55±0.25  | 0.0007               |                    |
| HPFS                        | Non-T carriers        | 0.43±0.05                             | 0.52±0.04  | 0.59±0.12  | 0.73                 | 0.03               |
|                             | T carriers            | 0.21±0.11                             | 0.52±0.07  | 0.79±0.22  | 0.02                 |                    |
| WHI                         | Non-T carriers        | 0.11±0.08                             | 0.28±0.06  | 0.28±0.34  | 0.04                 | 0.09               |
|                             | T carriers            | 0.02±0.15                             | 0.29±0.11  | 0.94±0.67  | 0.01                 |                    |
| SCHS                        | Non-T carriers        | -3.08±0.19                            | -3.00±0.17 | -3.35±0.18 | 0.32                 | 0.01               |
|                             | T carriers            | -3.61±0.17                            | -3.10±0.15 | -3.25±0.17 | 0.13                 |                    |
| Pooled <sup>1</sup>         | Non-T carriers        | 0.50±0.03                             | 0.67±0.03  | 0.81±0.08  | 0.01                 | 0.0007             |
|                             | T carriers            | 0.38±0.07                             | 0.63±0.05  | 1.11±0.16  | 2×10 <sup>-4</sup>   |                    |
| Food-sourced EPA+DHA, g/day |                       | T1                                    | T2         | T3         |                      |                    |
| NHS                         | Non-T carriers        | 0.79±0.06                             | 0.92±0.05  | 1.11±0.06  | 0.01                 | 0.005              |
|                             | T carriers            | 0.71±0.10                             | 0.84±0.11  | 1.19±0.11  | 0.0001               |                    |
| HPFS                        | Non-T carriers        | 0.46±0.05                             | 0.53±0.05  | 0.49±0.05  | 0.79                 | 0.02               |
|                             | T carriers            | 0.23±0.11                             | 0.48±0.10  | 0.58±0.09  | 0.02                 |                    |
| WHI                         | Non-T carriers        | 0.02±0.08                             | 0.21±0.08  | 0.41±0.08  | 0.06                 | 0.04               |
|                             | T carriers            | -0.03±0.15                            | 0.29±0.14  | 0.35±0.15  | 0.004                |                    |
| SCHS                        | Non-T carriers        | -3.32±0.17                            | -3.15±0.18 | -2.99±0.17 | 0.16                 | 0.035              |
|                             | T carriers            | -3.55±0.16                            | -3.34±0.16 | -3.05±0.16 | 0.02                 |                    |
| Pooled <sup>1</sup>         | Non-T carriers        | 0.49±0.03                             | 0.64±0.03  | 0.68±0.03  | 0.01                 | 0.0003             |
|                             | T carriers            | 0.39±0.07                             | 0.57±0.06  | 0.74±0.06  | 1.5×10 <sup>-6</sup> |                    |
| Total EPA+DHA, g/day        |                       | T1                                    | T2         | T3         |                      |                    |

|    |                     |                |           |           |           |      |       |
|----|---------------------|----------------|-----------|-----------|-----------|------|-------|
| 1  |                     |                |           |           |           |      |       |
| 2  |                     |                |           |           |           |      |       |
| 3  | NHS                 | Non-T carriers | 0.79±0.06 | 0.94±0.05 | 1.08±0.06 | 0.8  | 0.01  |
| 4  |                     |                |           |           |           |      |       |
| 5  |                     | T carriers     | 0.72±0.11 | 0.87±0.10 | 1.16±0.11 | 0.02 |       |
| 6  |                     |                |           |           |           |      |       |
| 7  | HPFS                | Non-T carriers | 0.47±0.05 | 0.53±0.05 | 0.49±0.05 | 0.88 | 0.13  |
| 8  |                     |                |           |           |           |      |       |
| 9  |                     | T carriers     | 0.23±0.10 | 0.50±0.09 | 0.57±0.10 | 0.16 |       |
| 10 |                     |                |           |           |           |      |       |
| 11 | WHI                 | Non-T carriers | 0.39±0.10 | 0.04±0.08 | 0.23±0.10 | 0.42 | 0.27  |
| 12 |                     |                |           |           |           |      |       |
| 13 |                     | T carriers     | 0.04±0.18 | 0.28±0.15 | 0.28±0.16 | 0.84 |       |
| 14 |                     |                |           |           |           |      |       |
| 15 | Pooled <sup>1</sup> | Non-T carriers | 0.57±0.04 | 0.62±0.03 | 0.67±0.04 | 0.65 | 0.005 |
| 16 |                     |                |           |           |           |      |       |
| 17 |                     | T carriers     | 0.39±0.07 | 0.60±0.06 | 0.74±0.07 | 0.01 |       |

---

Data are means ± SE.

<sup>1</sup>P for interaction was generated from dominant model of *FADS* rs174570 (CC vs CT+TT).

Numbers of T carriers/Non-T carriers in the NHS, HPFS, WHI, and SCHS are 1698/9625, 1025/5808, 876/5378, and 1842/3422, respectively.

Data on BMI, long chain n-3 PUFAs and fish consumptions were assessed at baseline in the NHS (1990), the HPFS (1990), the WHI (1994-1998), and the SCHS (1993-1998), respectively.

Data on follow-up BMI was assessed in 2000 in the NHS and HPFS, in the sixth follow-up year in the WHI, and from 2006 to 2010 in the SCHS, respectively.

Long-term BMI changes were calculated based on the changes in BMI from baseline to follow-up year in the four cohorts, respectively.

The general linear model was used to test the associations of long chain n-3 PUFAs and fish intakes with long-term changes in BMI by *FADS* genotypes after adjustment for age, source of genotyping data, baseline BMI, smoking, alcohol intake, physical activity, total energy intake, alternate healthy eating index, television watching, sugar sweetened beverage, fried food consumption.

The results were pooled by means of fixed effects meta-analyses (if  $P \geq 0.05$  for heterogeneity between studies).

Registration: [www.clinicaltrials.gov](http://www.clinicaltrials.gov). Registration ID: NCT03348566



## Figure Legends

### Figure 1 Genetic variant of *FADS* rs174570, long chain n-3 PUFAs and fish intakes and long-term BMI changes

Effect size (ES) (95% CI) values are  $\beta$  coefficients for interaction between the *FADS* variant rs174570 (additive model) and diets from results of the NHS, HPFS, WHI, and SCHS cohorts.

Data on BMI, long chain n-3 PUFAs (food sourced EPA+ DHA and total EPA+ DHA (food and supplemental use)) and fish consumptions were assessed at baseline in the NHS (1990), the HPFS (1990), the WHI (1994-1998), and the SCHS (1993-1998), respectively.

Data on follow-up BMI was assessed in 2000 in the NHS and HPFS, in the sixth follow-up year in the WHI, and from 2006 to 2010 in the SCHS, respectively.

Long-term BMI changes were calculated based on the changes in BMI from baseline to follow-up year in the four cohorts, respectively.

The general linear model was used to test the *FADS* variant-diets interaction by including a multiplicative interaction term in the models after adjustment for age, source of genotyping data, baseline BMI, smoking, alcohol intake, physical activity, total energy intake, alternate healthy eating index, television watching, sugar sweetened beverage, fried food consumption.

The results were pooled by means of fixed effects meta-analyses (if  $P \geq 0.05$  for heterogeneity between studies).

### Figure 2 Genetic association of *FADS* variant rs174570 with long-term BMI change according to long chain n-3 PUFAs and fish intakes

Pooled-EUR: data from NHS, HPFS, and WHI were pooled.

Pooled Multiethnic: data from NHS, HPFS, WHI and SCHS were pooled.

Data are  $\beta$  coefficients  $\pm$  SE.

Numbers of participants across three categories ( $\leq 1/\text{wk}$ / $1\sim 6/\text{wk}$ / $\geq 1/\text{d}$ ) of fish intake in the NHS, HPFS, WHI, and SCHS are 1618/8465/1239, 977/5108/748, 894/4675/684, and 752/3935/576, respectively.

1  
2  
3 Frequency of fish intake:  $\leq 1$  serving per week, 1~6 servings per week, and 1 serving per day

4  
5 Data on BMI, long chain n-3 PUFAs (food sourced EPA+ DHA and total EPA+ DHA (food and  
6  
7 supplemental use)) and fish consumptions were assessed at baseline in the NHS (1990), the HPFS (1990),  
8  
9 the WHI (1994-1998), and the SCHS (1993-1998), respectively.

10  
11 Data on follow-up BMI was assessed in 2000 in the NHS and HPFS, in the sixth follow-up year in the  
12  
13 WHI, and from 2006 to 2010 in the SCHS, respectively.

14  
15 The general linear model was used to test the genetic association of the *FADS* variant (additive model)  
16  
17 with long-term changes in BMI by frequency of fish intake and tertiles of LC fatty acids after adjustment  
18  
19 for age, source of genotyping data, baseline BMI, smoking, alcohol intake, physical activity, total energy  
20  
21 intake, alternate healthy eating index, television watching, sugar sweetened beverage, fried food  
22  
23 consumption. The results were pooled by means of fixed effects meta-analyses (if  $P \geq 0.05$  for  
24  
25 heterogeneity between studies).  
26  
27  
28  
29

30  
31 **Figure 3 Predicted long-term changes in BMI from long chain n-3 PUFAs intake according to *FADS***  
32  
33 **genotypes**

34  
35 Numbers of T carriers/Non-T carriers in the NHS, HPFS, and WHI are 1698/9625, 1025/5808, and  
36  
37 876/5378, respectively.

38  
39 Black circles for T allele carriers and open circle for non-T-carriers.

40  
41 The general linear model was used to test the associations of long chain n-3 PUFAs intake with long-term  
42  
43 changes in BMI according to *FADS* genotypes after adjustment for age, source of genotyping data,  
44  
45 baseline BMI, smoking, alcohol intake, physical activity, total energy intake, alternate healthy eating index,  
46  
47 television watching, sugar sweetened beverage, fried food consumption.  
48

49  
50 The data on food-sourced EPA+DHA was pooled from the NHS and HPFS cohorts. Data from US cohorts  
51  
52 was pooled by means of fixed effects meta-analyses (if  $P \geq 0.05$  for heterogeneity between studies).  
53  
54  
55  
56  
57  
58  
59

1  
2  
3 **Figure 4 Predicted long-term changes in BMI from fish intake according to *FADS* genotypes**  
4

5 Numbers of T carriers/Non-T carriers in the NHS, HPFS, and WHI are 1698/9625, 1025/5808, and  
6  
7 876/5378, respectively.  
8

9 Black circles for T allele carriers and open circle for non-T-carriers.  
10

11 The general linear model was used to test the associations of and fish intake with long-term changes in  
12  
13 BMI according to *FADS* genotypes after adjustment for age, source of genotyping data, baseline BMI,  
14  
15 smoking, alcohol intake, physical activity, total energy intake, alternate healthy eating index, television  
16  
17 watching, sugar sweetened beverage, fried food consumption.  
18

19 The data on total fish intake was pooled from the NHS, HPFS, and WHI cohorts. Data from US cohorts  
20  
21 was pooled by means of fixed effects meta-analyses (if  $P \geq 0.05$  for heterogeneity between studies).  
22  
23  
24  
25  
26  
27  
28  
29  
30  
31  
32  
33  
34  
35  
36  
37  
38  
39  
40  
41  
42  
43  
44  
45  
46  
47  
48  
49  
50  
51  
52  
53  
54  
55  
56  
57  
58  
59  
60

Figure 1

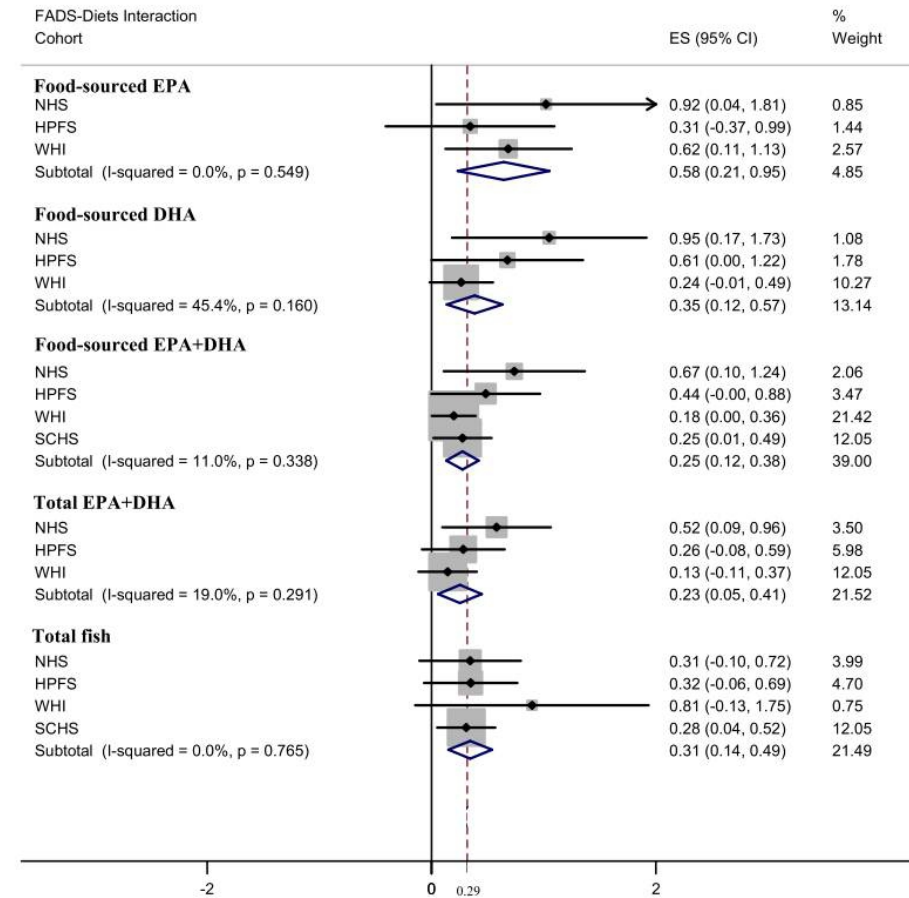

Figure 1

180x180mm (120 x 120 DPI)

1  
2  
3  
4  
5  
6  
7  
8  
9  
10  
11  
12  
13  
14  
15  
16  
17  
18  
19  
20  
21  
22  
23  
24  
25  
26  
27  
28  
29  
30  
31  
32  
33  
34  
35  
36  
37  
38  
39  
40  
41  
42  
43  
44  
45  
46  
47  
48  
49  
50  
51  
52  
53  
54  
55  
56  
57  
58  
59  
60

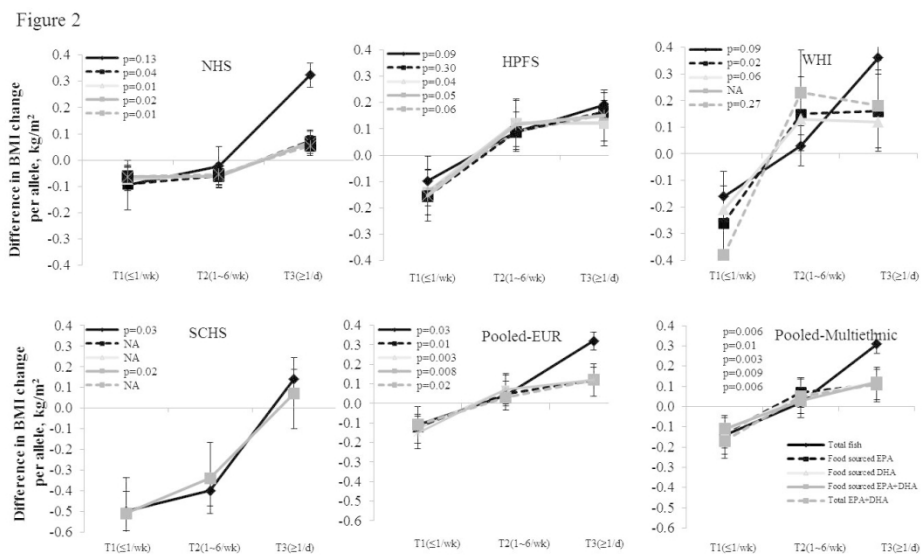

Figure 1

245x138mm (150 x 150 DPI)

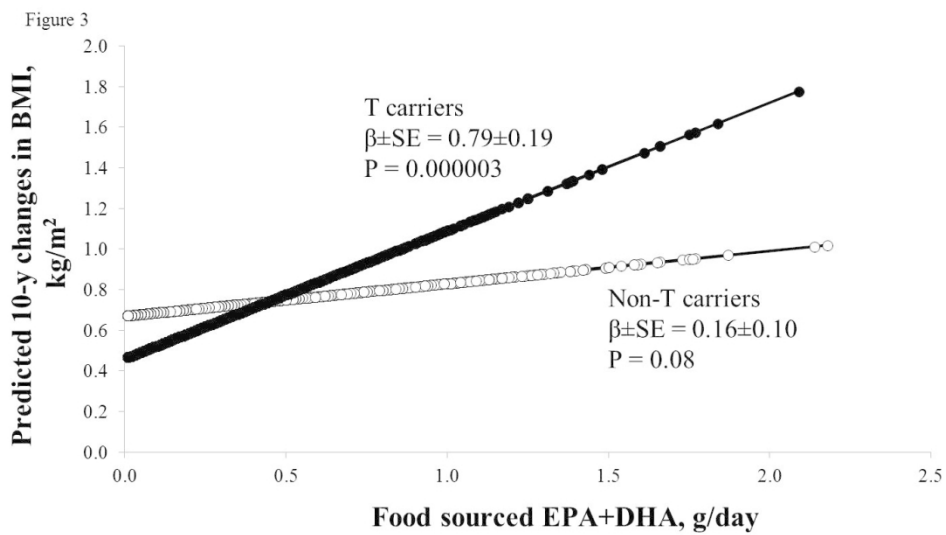

Figure 3

248x140mm (150 x 150 DPI)

1  
2  
3  
4  
5  
6  
7  
8  
9  
10  
11  
12  
13  
14  
15  
16  
17  
18  
19  
20  
21  
22  
23  
24  
25  
26  
27  
28  
29  
30  
31  
32  
33  
34  
35  
36  
37  
38  
39  
40  
41  
42  
43  
44  
45  
46  
47  
48  
49  
50  
51  
52  
53  
54  
55  
56  
57  
58  
59  
60

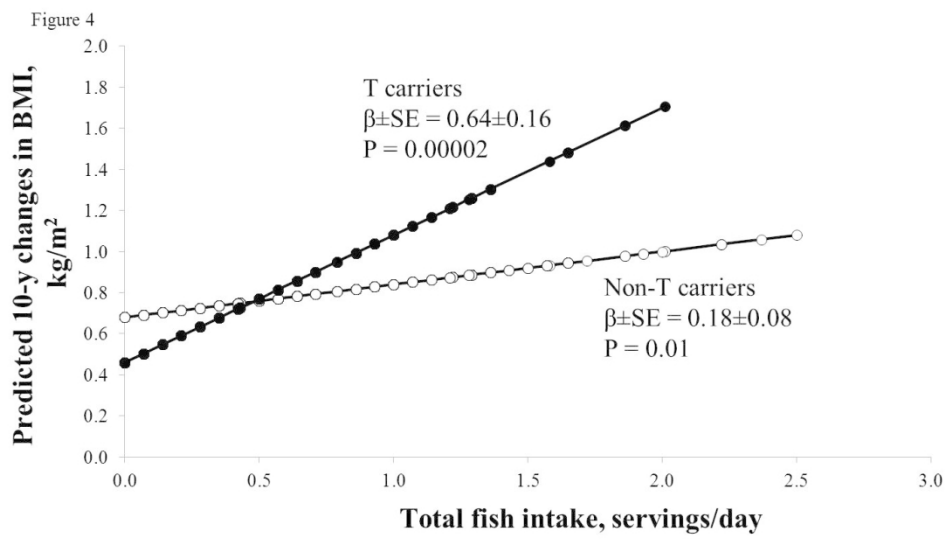

Figure 4  
249x142mm (150 x 150 DPI)

**Supplemental table 1. Annotation for the top six SNPs under positive selection in Greenlandic Inuit**

| Position <sup>1</sup> | Reference                       |                      | DAF            |            |      |       |       |      |      | PBS  |
|-----------------------|---------------------------------|----------------------|----------------|------------|------|-------|-------|------|------|------|
|                       | SNP<br>identification<br>number | Alleles <sup>2</sup> | CEU            | CHB        | GI   | NHS   | HPFS  | WHI  | SCHS |      |
|                       |                                 |                      | chr11:61627960 | rs74771917 | C/T  | 0.025 | 0.16  | 0.98 | /    |      |
| chr11:61631510        | rs3168072                       | A/T                  | 0.017          | 0.18       | 0.98 | /     | /     | /    | /    | 2.64 |
| chr11:61632310        | rs12577276                      | A/G                  | 0.017          | 0.18       | 0.98 | /     | /     | /    | /    | 2.64 |
| chr11:61641717        | rs7115739                       | G/T                  | 0.017          | 0.22       | 0.98 | 0.004 | 0.004 | /    | /    | 2.54 |
| chr11:61624414        | rs174602                        | C/T                  | 0.80           | 0.73       | 0.01 | 0.82  | 0.81  | /    | /    | 2.11 |
| chr11:61597212        | rs174570                        | C/T                  | 0.16           | 0.34       | 0.99 | 0.15  | 0.15  | 0.14 | 0.35 | 2.06 |

<sup>1</sup>Positions refer to human genome assembly hg19.

<sup>2</sup>Alleles are coded as ancestral/derived states.

PBS, the population branch statistic; DAF, derived allele frequency; CEU, European ancestry; CHB, an Chinese; GI, Greenlandic Inuit

DAFs for each population (CEU, CHB, and GI) and PBS values are reported, along with the genomic position for each SNP.



Supplemental table 2 Main effect of the *FADS* variants on adiposity in the four cohorts

| Adiposity (kg/m <sup>2</sup> ) | <i>FADS</i><br>SNPs | NHS          |       | HPFS         |       | WHI        |      | SCHS       |       | Pooled       |       |
|--------------------------------|---------------------|--------------|-------|--------------|-------|------------|------|------------|-------|--------------|-------|
|                                |                     | Beta ± SE    | P     | Beta ± SE    | P     | Beta ± SE  | P    | Beta ± SE  | P     | Beta ± SE    | P     |
| Baseline BMI                   | rs174570            | 0.03 ± 0.10  | 0.733 | -0.05 ± 0.09 | 0.538 | -0.06±0.17 | 0.72 | 0.24±0.08  | 0.002 | 0.08±0.05    | 0.06  |
| Baseline BMI                   | rs174602            | 0.08 ± 0.10  | 0.418 | -0.05 ± 0.08 | 0.536 | /          | /    | /          | /     | 0.00 ± 0.03  | 0.559 |
| Baseline BMI                   | rs7115739           | 0.25 ± 0.52  | 0.634 | -0.77 ± 0.43 | 0.077 | /          | /    | /          | /     | -0.35 ± 0.14 | 0.196 |
| Long-term BMI change           | rs174570            | -0.05 ± 0.06 | 0.401 | 0.01 ± 0.05  | 0.917 | -0.02±0.09 | 0.77 | -0.02±0.08 | 0.85  | -0.02±0.03   | 0.94  |
| Long-term BMI change           | rs174602            | -0.14 ± 0.06 | 0.009 | 0.04 ± 0.05  | 0.413 | /          | /    | /          | /     | -0.04 ± 0.01 | 0.025 |
| Long-term BMI change           | rs7115739           | 0.45 ± 0.29  | 0.124 | -0.23 ± 0.26 | 0.359 | /          | /    | /          | /     | 0.06 ± 0.08  | 0.183 |

Long-term BMI change: BMI change from 1990 to 2000.

Numbers of T carriers/Non-T carriers in the NHS, HPFS, WHI, and SCHS are 1698/9625, 1025/5808, 876/5378, and 1842/3422, respectively.

Effect size (ES) values are β coefficients for relationship between the *FADS* variant rs174570 (additive model) and adiposity.

The general linear model was used to test the genetic association of *FADS* variants with long-term changes in BMI after adjustment for age, source of genotyping data.

**Supplemental table 3 Genetic association of *FADS* variant with long-term changes in body weight according to long chain n-3 PUFAs and fish intakes**

| Cohorts                            | Difference in long-term changes in weight, |            |            | P for interaction |
|------------------------------------|--------------------------------------------|------------|------------|-------------------|
|                                    | kg                                         |            |            |                   |
| <b>Total Fish, serving/day</b>     | ≤1/wk                                      | 1~6/wk     | ≥1/d       |                   |
| NHS                                | -0.69±0.64                                 | -0.13±0.49 | 1.78±1.64  | 0.05              |
| HPFS                               | -0.99±0.85                                 | 0.54±0.53  | 1.52±1.69  | 0.12              |
| WHI                                | -0.22±0.42                                 | 0.16±0.34  | 1.26±1.57  | 0.13              |
| SCHS                               | -0.42±0.29                                 | -0.44±0.28 | 0.20±0.29  | 0.08              |
| Pooled                             | -0.44±0.22                                 | -0.10±0.18 | 0.31±0.28  | 0.01              |
| <b>Food-sourced EPA, g/day</b>     | T1                                         | T2         | T3         |                   |
| NHS                                | -0.77±0.62                                 | -0.25±0.72 | 0.53±0.64  | 0.06              |
| HPFS                               | -1.19±0.82                                 | 0.75±0.73  | 0.72±0.74  | 0.41              |
| WHI                                | -0.19±0.42                                 | 0.24±0.47  | 0.14±0.48  | 0.20              |
| Pooled                             | -0.50±0.32                                 | 0.24±0.34  | 0.37±0.34  | 0.10              |
| <b>Food-sourced DHA, g/day</b>     | T1                                         | T2         | T3         |                   |
| NHS                                | -0.53±0.62                                 | -0.39±0.70 | 0.53±0.65  | 0.01              |
| HPFS                               | -1.06±0.82                                 | 0.49±0.71  | 0.89±0.76  | 0.09              |
| WHI                                | -0.20±0.43                                 | 0.22±0.42  | 0.30±0.50  | 0.26              |
| Pooled                             | -0.43±0.32                                 | 0.15±0.32  | 0.49±0.35  | 0.01              |
| <b>Food-sourced EPA+DHA, g/day</b> | T1                                         | T2         | T3         |                   |
| NHS                                | -0.56±0.63                                 | -0.32±0.68 | 0.49±0.66  | 0.01              |
| HPFS                               | -1.25±0.83                                 | 0.68±0.73  | 0.84±0.74  | 0.09              |
| WHI                                | -0.02±0.43                                 | 0.16±0.44  | 0.14±0.49  | 0.23              |
| SCHS                               | -0.47±0.29                                 | -0.16±0.28 | -0.03±0.29 | 0.10              |

|                             |            |            |           |       |
|-----------------------------|------------|------------|-----------|-------|
| Pooled                      | -0.56±0.25 | -0.09±0.24 | 0.14±0.25 | 0.005 |
| <b>Total EPA+DHA, g/day</b> | T1         | T2         | T3        |       |
| NHS                         | -0.58±0.63 | -0.30±0.68 | 0.46±0.66 | 0.02  |
| HPFS                        | -1.20±0.82 | 0.75±0.70  | 0.86±0.77 | 0.18  |
| WHI                         | -0.48±0.47 | 0.64±0.43  | 0.04±0.47 | 0.15  |
| Pooled                      | -0.64±0.34 | 0.45±0.32  | 0.32±0.34 | 0.02  |

Data are  $\beta$  coefficients  $\pm$  SE.

Numbers of T carriers/Non-T carriers in the NHS, HPFS, WHI, and SCHS are 1698/9625, 1025/5808, 876/5378, and 1842/3422, respectively.

Frequency of fish intake:  $\leq$  1 serving per week, 1~6 servings per week, and 1 serving per day

Data on baseline fish and fatty acids consumptions were assessed in 1990 (NHS) and 1990 (HPFS).

Data on body weight were assessed in 1990 and 2000 in NHS and 1990 and 2000 in HPFS.

The general linear model was used to test the genetic association with long-term changes in body weight according to baseline long chain n-3 PUFAs and fish intakes after adjustment for age, source of genotyping data, baseline body weight, smoking, alcohol intake, physical activity, total energy intake, alternate healthy eating index, television watching, sugar sweetened beverage, fried food consumption.

Data from three or four cohorts pooled by means of fixed effects meta-analyses (if  $P \geq 0.05$  for heterogeneity between studies).

**Supplemental table 4 Associations of long chain n-3 PUFAs and fish intakes with long-term changes in body weight according to *FADS* genotypes**

| Cohorts                 |                | Long-term changes in weight, kg |            |            | P for trend |
|-------------------------|----------------|---------------------------------|------------|------------|-------------|
| Total Fish, serving/day |                | ≤1/wk                           | 1~6/wk     | ≥1/d       |             |
| NHS                     | Non T carriers | 4.91±0.34                       | 5.78±0.24  | 7.00±0.79  | 0.008       |
|                         | T carriers     | 4.45±0.61                       | 5.64±0.46  | 9.26±1.44  | 0.001       |
| HPFS                    | Non T carriers | 0.44±0.06                       | 0.52±0.04  | 0.56±0.12  | 0.99        |
|                         | T carriers     | 0.25±0.10                       | 0.53±0.07  | 0.76±0.21  | 0.08        |
| WHI                     | Non T carriers | -0.25±0.23                      | -0.43±0.18 | -0.91±0.93 | 0.50        |
|                         | T carriers     | -0.56±0.37                      | -0.25±0.28 | 1.30±1.71  | 0.13        |
| SCHS                    | Non T carriers | -3.15±0.23                      | -3.50±0.21 | -3.38±0.21 | 0.48        |
|                         | T carriers     | -3.68±0.20                      | -3.41±0.19 | -3.34±0.20 | 0.16        |
| Food-sourced EPA, g/day |                | T1                              | T2         | T3         |             |
| NHS                     | Non T carriers | 4.89±0.33                       | 5.89±0.33  | 5.95±0.33  | 0.24        |
|                         | T carriers     | 4.45±0.59                       | 5.52±0.63  | 6.46±0.61  | 0.34        |
| HPFS                    | Non T carriers | 0.50±0.05                       | 0.54±0.05  | 0.45±0.05  | 0.15        |
|                         | T carriers     | 0.29±0.10                       | 0.54±0.09  | 0.52±0.09  | 0.66        |
| WHI                     | Non T carriers | -0.30±0.25                      | -0.54±0.24 | -0.29±0.24 | 0.42        |
|                         | T carriers     | -0.51±0.39                      | -0.36±0.37 | -0.15±0.38 | 0.14        |
| Food-sourced DHA, g/day |                | T1                              | T2         | T3         |             |
| NHS                     | Non T carriers | 4.78±0.33                       | 5.56±0.34  | 6.32±0.33  | 0.14        |
|                         | T carriers     | 4.50±0.60                       | 5.07±0.63  | 6.77±0.61  | 0.004       |
| HPFS                    | Non T carriers | 0.48±0.05                       | 0.54±0.05  | 0.46±0.06  | 0.40        |
|                         | T carriers     | 0.27±0.10                       | 0.50±0.09  | 0.59±0.09  | 0.15        |
| WHI                     | Non T carriers | -0.41±0.25                      | -0.25±0.24 | -0.45±0.25 | 0.51        |

|      |                                    |            |            |            |            |        |
|------|------------------------------------|------------|------------|------------|------------|--------|
|      |                                    | T carriers | -0.71±0.39 | -0.15±0.37 | -0.16±0.39 | 0.18   |
|      | <b>Food-sourced EPA+DHA, g/day</b> |            | T1         | T2         | T3         |        |
| NHS  | Non T carriers                     |            | 4.69±0.34  | 5.45±0.33  | 6.51±0.33  | 0.02   |
|      | T carriers                         |            | 4.44±0.61  | 5.00±0.61  | 6.92±0.61  | 0.0003 |
| HPFS | Non T carriers                     |            | 0.48±0.05  | 0.53±0.05  | 0.47±0.05  | 0.93   |
|      | T carriers                         |            | 0.26±0.10  | 0.49±0.09  | 0.59±0.09  | 0.08   |
| WHI  | Non T carriers                     |            | -0.44±0.24 | -0.23±0.23 | -0.43±0.24 | 0.47   |
|      | T carriers                         |            | -0.52±0.38 | -0.15±0.37 | -0.33±0.38 | 0.15   |
| SCHS | Non T carriers                     |            | -3.44±0.21 | -3.58±0.22 | -3.05±0.21 | 0.89   |
|      | T carriers                         |            | -3.73±0.19 | -3.57±0.19 | -3.12±0.19 | 0.12   |
|      | <b>Total EPA+DHA, g/day</b>        |            | T1         | T2         | T3         |        |
| NHS  | Non T carriers                     |            | 4.74±0.34  | 5.55±0.32  | 6.36±0.34  | 0.81   |
|      | T carriers                         |            | 4.49±0.61  | 5.16±0.60  | 6.70±0.61  | 0.03   |
| HPFS | Non T carriers                     |            | 0.49±0.05  | 0.53±0.05  | 0.47±0.06  | 0.24   |
|      | T carriers                         |            | 0.26±0.10  | 0.51±0.09  | 0.58±0.09  | 0.33   |
| WHI  | Non T carriers                     |            | 0.32±0.27  | -0.84±0.23 | -0.60±0.28 | 0.19   |
|      | T carriers                         |            | -0.26±0.45 | -0.21±0.37 | -0.02±0.11 | 0.08   |

Data on baseline fish and fatty acids consumptions were assessed in 1990 (NHS) and 1990 (HPFS).

Numbers of T carriers/Non-T carriers in the NHS, HPFS, WHI, and SCHS are 1698/9625, 1025/5808, 876/5378, and 1842/3422, respectively.

Data on body weight were assessed in 1990 and 2000 in NHS and 1990 and 2000 in HPFS.

The general linear model was used to test the associations of long chain n-3 PUFAs and fish intakes with long-term changes in body weight by *FADS* genotypes after adjustment for age, source of genotyping data, baseline body weight, smoking, alcohol intake, physical activity, total energy intake, alternate healthy eating index, television watching, sugar sweetened beverage, fried food consumption.

Data from two cohorts pooled by means of fixed effects meta-analyses (if  $P \geq 0.05$  for heterogeneity between studies) or random effects meta-analyses (if  $P < 0.05$  for heterogeneity between studies).

**Supplemental Table 5 Associations of long chain n-3 PUFAs and fish intakes with long-term changes in BMI according to *FADS* genotypes**

| Diets                   | <i>FADS</i> genotypes | Long chain n-3 PUFAs and fish intakes |           |           | P for trend        | P for interaction* |
|-------------------------|-----------------------|---------------------------------------|-----------|-----------|--------------------|--------------------|
|                         |                       | Categories of diets                   |           |           |                    |                    |
| Food-sourced EPA, g/day |                       | T1                                    | T2        | T3        |                    |                    |
| NHS                     | Non-T carriers        | 0.82±0.06                             | 1.00±0.06 | 1.01±0.06 | 0.24               | 0.05               |
|                         | T carriers            | 0.72±0.10                             | 0.94±0.11 | 1.10±0.11 | 0.29               |                    |
| HPFS                    | Non-T carriers        | 0.48±0.05                             | 0.54±0.05 | 0.47±0.05 | 0.72               | 0.37               |
|                         | T carriers            | 0.23±0.11                             | 0.54±0.10 | 0.52±0.09 | 0.45               |                    |
| WHI                     | Non-T carriers        | 0.10±0.09                             | 0.09±0.09 | 0.45±0.09 | 0.21               | 0.02               |
|                         | T carriers            | -0.08±0.15                            | 0.23±0.15 | 0.46±0.15 | 0.003              |                    |
| Pooled                  | Non-T carriers        | 0.54±0.04                             | 0.63±0.04 | 0.65±0.04 | 0.35               | 0.01               |
|                         | T carriers            | 0.39±0.07                             | 0.63±0.07 | 0.70±0.06 | 0.01               |                    |
| Food-sourced DHA, g/day |                       | T1                                    | T2        | T3        |                    |                    |
| NHS                     | Non-T carriers        | 0.80±0.06                             | 0.94±0.06 | 1.08±0.06 | 0.14               | 0.009              |
|                         | T carriers            | 0.74±0.10                             | 0.83±0.11 | 1.17±0.10 | 0.002              |                    |
| HPFS                    | Non-T carriers        | 0.46±0.05                             | 0.54±0.05 | 0.49±0.05 | 0.99               | 0.05               |
|                         | T carriers            | 0.24±0.10                             | 0.49±0.10 | 0.58±0.09 | 0.05               |                    |
| WHI                     | Non-T carriers        | 0.03±0.09                             | 0.20±0.09 | 0.42±0.09 | 0.03               | 0.06               |
|                         | T carriers            | -0.10±0.15                            | 0.33±0.15 | 0.39±0.15 | 0.006              |                    |
| Pooled                  | Non-T carriers        | 0.51±0.04                             | 0.63±0.04 | 0.68±0.04 | 0.1                | 0.002              |
|                         | T carriers            | 0.38±0.06                             | 0.58±0.07 | 0.77±0.06 | 7×10 <sup>-4</sup> |                    |

Data are means ± SE.

<sup>1</sup>P for interaction was generated from dominant model of *FADS* rs174570 (CC vs CT+TT).

Numbers of T carriers/Non-T carriers in the NHS, HPFS, WHI, and SCHS are 1698/9625, 1025/5808, 876/5378, and 1842/3422, respectively.

Data on BMI, long chain n-3 PUFAs consumptions were assessed at baseline in the NHS (1990), the HPFS (1990), the WHI (1994-1998), and the SCHS (1993-1998), respectively.

Data on follow-up BMI was assessed in 2000 in the NHS and HPFS, in the sixth follow-up year in the

1  
2  
3  
4  
5  
6 WHI, and from 2006 to 2010 in the SCHS, respectively.

7  
8 Long-term BMI changes were calculated based on the changes in BMI from baseline to follow-up year in  
9  
10 the four cohorts, respectively.

11  
12 The general linear model was used to test the associations of long chain n-3 PUFAs and fish intakes with  
13  
14 long-term changes in BMI by *FADS* genotypes after adjustment for age, source of genotyping data,  
15  
16 baseline BMI, smoking, alcohol intake, physical activity, total energy intake, alternate healthy eating index,  
17  
18 television watching, sugar sweetened beverage, fried food consumption.

19  
20 The results were pooled by means of fixed effects meta-analyses (if  $P \geq 0.05$  for heterogeneity between  
21  
22 studies).

23  
24 Registration: [www. clinicaltrials.gov](http://www.clinicaltrials.gov). Registration ID: NCT03348566  
25  
26  
27  
28  
29  
30  
31  
32  
33  
34  
35  
36  
37  
38  
39  
40  
41  
42  
43  
44  
45  
46  
47  
48  
49  
50  
51  
52  
53  
54  
55  
56  
57  
58  
59  
60

## STROBE Statement—checklist of items that should be included in reports of observational studies

|                              | Item No | Recommendation                                                                                                                                                                                                                                                                                                                                                                                                                                                                                                                                                                                                                                                                                                               |
|------------------------------|---------|------------------------------------------------------------------------------------------------------------------------------------------------------------------------------------------------------------------------------------------------------------------------------------------------------------------------------------------------------------------------------------------------------------------------------------------------------------------------------------------------------------------------------------------------------------------------------------------------------------------------------------------------------------------------------------------------------------------------------|
| <b>Title and abstract</b>    | 1       | (a) Indicate the study's design with a commonly used term in the title or the abstract <b>(p. 3)</b><br>(b) Provide in the abstract an informative and balanced summary of what was done and what was found <b>(p. 3)</b>                                                                                                                                                                                                                                                                                                                                                                                                                                                                                                    |
| <b>Introduction</b>          |         |                                                                                                                                                                                                                                                                                                                                                                                                                                                                                                                                                                                                                                                                                                                              |
| Background/rationale         | 2       | Explain the scientific background and rationale for the investigation being reported <b>(p. 4)</b>                                                                                                                                                                                                                                                                                                                                                                                                                                                                                                                                                                                                                           |
| Objectives                   | 3       | State specific objectives, including any prespecified hypotheses <b>(p. 4)</b>                                                                                                                                                                                                                                                                                                                                                                                                                                                                                                                                                                                                                                               |
| <b>Methods</b>               |         |                                                                                                                                                                                                                                                                                                                                                                                                                                                                                                                                                                                                                                                                                                                              |
| Study design                 | 4       | Present key elements of study design early in the paper <b>(p. 5)</b>                                                                                                                                                                                                                                                                                                                                                                                                                                                                                                                                                                                                                                                        |
| Setting                      | 5       | Describe the setting, locations, and relevant dates, including periods of recruitment, exposure, follow-up, and data collection <b>(p. 5)</b>                                                                                                                                                                                                                                                                                                                                                                                                                                                                                                                                                                                |
| Participants                 | 6       | (a) <i>Cohort study</i> —Give the eligibility criteria, and the sources and methods of selection of participants. Describe methods of follow-up<br><i>Case-control study</i> —Give the eligibility criteria, and the sources and methods of case ascertainment and control selection. Give the rationale for the choice of cases and controls<br><i>Cross-sectional study</i> —Give the eligibility criteria, and the sources and methods of selection of participants <b>(p. 5)</b><br>(b) <i>Cohort study</i> —For matched studies, give matching criteria and number of exposed and unexposed<br><i>Case-control study</i> —For matched studies, give matching criteria and the number of controls per case <b>(p. 5)</b> |
| Variables                    | 7       | Clearly define all outcomes, exposures, predictors, potential confounders, and effect modifiers. Give diagnostic criteria, if applicable <b>(p. 5)</b>                                                                                                                                                                                                                                                                                                                                                                                                                                                                                                                                                                       |
| Data sources/<br>measurement | 8*      | For each variable of interest, give sources of data and details of methods of assessment (measurement). Describe comparability of assessment methods if there is more than one group <b>(p. 5)</b>                                                                                                                                                                                                                                                                                                                                                                                                                                                                                                                           |
| Bias                         | 9       | Describe any efforts to address potential sources of bias <b>(p. 5 &amp; 6)</b>                                                                                                                                                                                                                                                                                                                                                                                                                                                                                                                                                                                                                                              |
| Study size                   | 10      | Explain how the study size was arrived at <b>(p. 6 &amp; 7)</b>                                                                                                                                                                                                                                                                                                                                                                                                                                                                                                                                                                                                                                                              |
| Quantitative variables       | 11      | Explain how quantitative variables were handled in the analyses. If applicable, describe which groupings were chosen and why <b>(p. 7)</b>                                                                                                                                                                                                                                                                                                                                                                                                                                                                                                                                                                                   |
| Statistical methods          | 12      | (a) Describe all statistical methods, including those used to control for confounding <b>(p. 7-9)</b><br>(b) Describe any methods used to examine subgroups and interactions <b>(p. 9)</b><br>(c) Explain how missing data were addressed <b>(p. 19)</b><br>(d) <i>Cohort study</i> —If applicable, explain how loss to follow-up was addressed<br><i>Case-control study</i> —If applicable, explain how matching of cases and controls was addressed<br><i>Cross-sectional study</i> —If applicable, describe analytical methods taking account of sampling strategy <b>(p. 9)</b><br>(e) Describe any sensitivity analyses <b>(p. 9)</b>                                                                                   |

Continued on next page



**Results**

|                  |     |                                                                                                                                                                                                                                                                                                                                                                                                                                                                  |
|------------------|-----|------------------------------------------------------------------------------------------------------------------------------------------------------------------------------------------------------------------------------------------------------------------------------------------------------------------------------------------------------------------------------------------------------------------------------------------------------------------|
| Participants     | 13* | (a) Report numbers of individuals at each stage of study—eg numbers potentially eligible, examined for eligibility, confirmed eligible, included in the study, completing follow-up, and analysed ( <b>p. 10</b> )<br>(b) Give reasons for non-participation at each stage ( <b>p. 10</b> )<br>(c) Consider use of a flow diagram ( <b>p. 10</b> )                                                                                                               |
| Descriptive data | 14* | (a) Give characteristics of study participants (eg demographic, clinical, social) and information on exposures and potential confounders ( <b>p. 10</b> )<br>(b) Indicate number of participants with missing data for each variable of interest ( <b>p. 10</b> )<br>(c) <i>Cohort study</i> —Summarise follow-up time (eg, average and total amount) ( <b>p. 10</b> )                                                                                           |
| Outcome data     | 15* | <i>Cohort study</i> —Report numbers of outcome events or summary measures over time ( <b>p. 10</b> )<br><i>Case-control study</i> —Report numbers in each exposure category, or summary measures of exposure ( <b>p. 10</b> )<br><i>Cross-sectional study</i> —Report numbers of outcome events or summary measures ( <b>p. 10</b> )                                                                                                                             |
| Main results     | 16  | (a) Give unadjusted estimates and, if applicable, confounder-adjusted estimates and their precision (eg, 95% confidence interval). Make clear which confounders were adjusted for and why they were included ( <b>p. 10</b> )<br>(b) Report category boundaries when continuous variables were categorized ( <b>p. 10</b> )<br>(c) If relevant, consider translating estimates of relative risk into absolute risk for a meaningful time period ( <b>p. 10</b> ) |
| Other analyses   | 17  | Report other analyses done—eg analyses of subgroups and interactions, and sensitivity analyses ( <b>p. 10</b> )                                                                                                                                                                                                                                                                                                                                                  |

**Discussion**

|                  |    |                                                                                                                                                                                             |
|------------------|----|---------------------------------------------------------------------------------------------------------------------------------------------------------------------------------------------|
| Key results      | 18 | Summarise key results with reference to study objectives ( <b>p. 11</b> )                                                                                                                   |
| Limitations      | 19 | Discuss limitations of the study, taking into account sources of potential bias or imprecision. Discuss both direction and magnitude of any potential bias ( <b>p. 115</b> )                |
| Interpretation   | 20 | Give a cautious overall interpretation of results considering objectives, limitations, multiplicity of analyses, results from similar studies, and other relevant evidence ( <b>p. 11</b> ) |
| Generalisability | 21 | Discuss the generalisability (external validity) of the study results ( <b>p. 11</b> )                                                                                                      |

**Other information**

|         |    |                                                                                                                                                                                |
|---------|----|--------------------------------------------------------------------------------------------------------------------------------------------------------------------------------|
| Funding | 22 | Give the source of funding and the role of the funders for the present study and, if applicable, for the original study on which the present article is based ( <b>p. 14</b> ) |
|---------|----|--------------------------------------------------------------------------------------------------------------------------------------------------------------------------------|

\*Give information separately for cases and controls in case-control studies and, if applicable, for exposed and unexposed groups in cohort and cross-sectional studies.

**Note:** An Explanation and Elaboration article discusses each checklist item and gives methodological background and published examples of transparent reporting. The STROBE checklist is best used in conjunction with this article (freely available on the Web sites of PLoS Medicine at <http://www.plosmedicine.org/>, Annals of Internal Medicine at <http://www.annals.org/>, and Epidemiology at <http://www.epidem.com/>). Information on the STROBE Initiative is available at [www.strobe-statement.org](http://www.strobe-statement.org).

# BMJ Open

## Fish and marine fatty acids interacted with genetic variants of FADS gene in influencing long-term weight gain

|                               |                                                                                                                                                                                                                                                                                                                                                                                                                                                                                                                                                                                                                                                                                                                                                                                                                                                                                                                                                                                                                                                                                                                                                                                                                                                                                                                                                                                                                                                                                                                                                                                                                                                                                                                                                                                                                                                                                                                                                                                                                                                                                                                                             |
|-------------------------------|---------------------------------------------------------------------------------------------------------------------------------------------------------------------------------------------------------------------------------------------------------------------------------------------------------------------------------------------------------------------------------------------------------------------------------------------------------------------------------------------------------------------------------------------------------------------------------------------------------------------------------------------------------------------------------------------------------------------------------------------------------------------------------------------------------------------------------------------------------------------------------------------------------------------------------------------------------------------------------------------------------------------------------------------------------------------------------------------------------------------------------------------------------------------------------------------------------------------------------------------------------------------------------------------------------------------------------------------------------------------------------------------------------------------------------------------------------------------------------------------------------------------------------------------------------------------------------------------------------------------------------------------------------------------------------------------------------------------------------------------------------------------------------------------------------------------------------------------------------------------------------------------------------------------------------------------------------------------------------------------------------------------------------------------------------------------------------------------------------------------------------------------|
| Journal:                      | <i>BMJ Open</i>                                                                                                                                                                                                                                                                                                                                                                                                                                                                                                                                                                                                                                                                                                                                                                                                                                                                                                                                                                                                                                                                                                                                                                                                                                                                                                                                                                                                                                                                                                                                                                                                                                                                                                                                                                                                                                                                                                                                                                                                                                                                                                                             |
| Manuscript ID                 | bmjopen-2018-022877.R1                                                                                                                                                                                                                                                                                                                                                                                                                                                                                                                                                                                                                                                                                                                                                                                                                                                                                                                                                                                                                                                                                                                                                                                                                                                                                                                                                                                                                                                                                                                                                                                                                                                                                                                                                                                                                                                                                                                                                                                                                                                                                                                      |
| Article Type:                 | Research                                                                                                                                                                                                                                                                                                                                                                                                                                                                                                                                                                                                                                                                                                                                                                                                                                                                                                                                                                                                                                                                                                                                                                                                                                                                                                                                                                                                                                                                                                                                                                                                                                                                                                                                                                                                                                                                                                                                                                                                                                                                                                                                    |
| Date Submitted by the Author: | 17-Aug-2018                                                                                                                                                                                                                                                                                                                                                                                                                                                                                                                                                                                                                                                                                                                                                                                                                                                                                                                                                                                                                                                                                                                                                                                                                                                                                                                                                                                                                                                                                                                                                                                                                                                                                                                                                                                                                                                                                                                                                                                                                                                                                                                                 |
| Complete List of Authors:     | <p>Huang, Tao; Peking University School of Public Health, Epidemiology and Biostatistics</p> <p>Wang, Tiange ; Department of Epidemiology, School of Public Health and Tropical Medicine, Tulane University</p> <p>Heianza, Yoriko ; Department of Epidemiology, School of Public Health and Tropical Medicine, Tulane University</p> <p>Wiggs, Janey ; Harvard Medical School, Massachusetts Eye and Ear Infirmary</p> <p>Sun, Dianjianyi ; School of Public Health and Tropical Medicine, Tulane University</p> <p>Han, Liyuan ; School of Public Health and Tropical Medicine, Tulane University</p> <p>Choi, Hyon-Kyoo ; Massachusetts General Hospital - Harvard Medical School Center for Nervous System Repair</p> <p>Chai, Jin Fang ; National University Singapore Yong Loo Lin School of Medicine</p> <p>Sim, Xueling ; Epidemiology Domain Saw Swee Hock School of Public Health, National University of Singapore</p> <p>Khor, Chiea Chuen ; Epidemiology Domain Saw Swee Hock School of Public Health, National University of Singapore</p> <p>Friedlander, Yechiel ; Hebrew University-Hadassah Braun School of Public Health</p> <p>Chan, Andrew T. ; Division of Gastroenterology, Massachusetts General Hospital</p> <p>Curhan, Gary ; Department of Epidemiology, Harvard School of Public Health</p> <p>Vivo, Immaculata De ; Department of Epidemiology, Harvard School of Public Health</p> <p>van Dam, Rob Martinu. ; Saw Swee Hock School of Public Health, National University of Singapore</p> <p>Heng, Chew Kiat ; Department of Paediatrics National University of Singapore</p> <p>Fuchs, Charles ; Brigham and Women's Hospital and Harvard Medical School</p> <p>Pasquale, Louis R. ; Department of Medicine, Brigham and Women's Hospital and Harvard Medical School</p> <p>Yuan, Jian-min ; Division of Cancer Control and Population Sciences, University of Pittsburgh Cancer Institute</p> <p>Hu, Frank B. ; Department of Nutrition, Harvard School of Public Health</p> <p>Koh, Woon Puay ; Duke-NUS Medical School</p> <p>Qi, Lu; Tulane University, Department of Epidemiology, School of Public</p> |

1  
2  
3  
4  
5  
6  
7  
8  
9  
10  
11  
12  
13  
14  
15  
16  
17  
18  
19  
20  
21  
22  
23  
24  
25  
26  
27  
28  
29  
30  
31  
32  
33  
34  
35  
36  
37  
38  
39  
40  
41  
42  
43  
44  
45  
46  
47  
48  
49  
50  
51  
52  
53  
54  
55  
56  
57  
58  
59  
60

|                                    |                                                                                |
|------------------------------------|--------------------------------------------------------------------------------|
|                                    | Health and Tropical Medicine,                                                  |
| <b>Primary Subject Heading</b> :   | Nutrition and metabolism                                                       |
| <b>Secondary Subject Heading</b> : | Diabetes and endocrinology, Epidemiology, Genetics and genomics, Public health |
| <b>Keywords</b> :                  | NUTRITION & DIETETICS, GENETICS, EPIDEMIOLOGY, obesity, gene-diet interaction  |
|                                    |                                                                                |

SCHOLARONE™  
Manuscripts

1  
2  
3 **Fish and marine fatty acids interacted with genetic variants of *FADS* gene in influencing long-term**  
4 **weight gain**  
5

6  
7 Tao Huang<sup>1,2,3\*</sup>, Tiange Wang<sup>4</sup>, Yoriko Heianza<sup>5</sup>, Janey Wiggs<sup>6</sup>, Dianjianyi Sun<sup>5</sup>, Liyuan Han<sup>5</sup>,  
8  
9 Hyon-Kyoo Choi<sup>7</sup>, Jin Fang Chai<sup>8</sup>, Xueling Sim<sup>8</sup>, Chiea Chuen Khor<sup>9,10</sup>, Yechiel Friedlander<sup>11</sup>, Andrew T.  
10  
11 Chan<sup>12</sup>, Gary Curhan<sup>13</sup>, Immaculata De Vivo<sup>13</sup>, Rob Martinu. van Dam<sup>8,14</sup>, Chew Kiat Heng<sup>15</sup>, Charles S.  
12  
13 Fuchs<sup>16,17</sup>, Louis R. Pasquale<sup>18</sup>, Jian-min Yuan<sup>19,20</sup>, Frank B. Hu<sup>14, 16</sup>, Woon Puay Koh<sup>8, 21</sup>, Lu Qi<sup>5, 14, 16\*</sup>

14  
15  
16 <sup>1</sup>*Department of Epidemiology and Biostatistics, School of Public Health, Peking University, Beijing 100191, China.*

17  
18 <sup>2</sup>*Department of Global Health, School of Public Health, Peking University, China.*

19  
20 <sup>3</sup>*Key Laboratory of Molecular Cardiovascular Sciences, Ministry of Education, China.*

21  
22 <sup>4</sup>*Shanghai Institute of Endocrine and Metabolic Diseases, Rui Jin Hospital, Shanghai Jiao Tong University School*  
23 *of Medicine, Shanghai, China.*

24  
25 <sup>5</sup>*Department of Epidemiology, School of Public Health and Tropical Medicine, Tulane University, 1440 Canal*  
26 *Street, Suite 1724 New Orleans, LA 70112.*

27  
28  
29 <sup>6</sup>*Department of Ophthalmology, Harvard Medical School, Massachusetts Eye and Ear Infirmary, Boston, MA 02115,*  
30 *USA.*

31  
32  
33 <sup>7</sup>*Department of Rheumatology, Massachusetts General Hospital and Harvard Medical School, Boston, MA 02115,*  
34 *USA.*

35  
36  
37 <sup>8</sup>*Epidemiology Domain, Saw Swee Hock School of Public Health, National University of Singapore, Singapore,*  
38 *117549.*

39  
40  
41 <sup>9</sup>*Genome Institute of Singapore, Agency for Science, Technology and Research, Singapore.*

42  
43 <sup>10</sup>*Department of Biochemistry, Yong Loo Lin School of Medicine, , National University of Singapore, Singapore.*

44  
45  
46 <sup>11</sup>*Unit of Epidemiology, Hebrew University-Hadassah Braun School of Public Health, POB 12272, Jerusalem 91120,*  
47 *Israel.*

48  
49 <sup>12</sup>*Division of Gastroenterology, Massachusetts General Hospital, Boston, MA 02114, USA.*

50  
51 <sup>13</sup>*Department of Epidemiology, Harvard School of Public Health, Boston, MA 02115, USA.*

52  
53 <sup>14</sup>*Department of Nutrition, Harvard School of Public Health, Boston, MA 02115, USA.*

54  
55  
56 <sup>15</sup>*Department of Paediatrics, National University of Singapore NUHS Tower Block, Level 12, 1E Kent Ridge Road*  
57 *Singapore 119228.*

1  
2  
3 <sup>16</sup>Department of Medicine, Brigham and Women's Hospital and Harvard Medical School Boston, MA 02115, USA.

4  
5 <sup>17</sup>The Center for Gastrointestinal Cancer, Dana-Farber Cancer Institute, Boston, USA.

6  
7 <sup>18</sup>Channing Division of Network Medicine, Department of Medicine, Brigham and Women's Hospital and Harvard  
8  
9 Medical School, Boston, MA 02115, USA.

10  
11 <sup>19</sup>Division of Cancer Control and Population Sciences, University of Pittsburgh Cancer Institute, Pittsburgh, PA,  
12  
13 USA.

14  
15 <sup>20</sup>Department of Epidemiology, University of Pittsburgh Graduate School of Public Health, Pittsburgh, PA, USA.

16  
17 <sup>21</sup>Duke-NUS Medical School, Singapore, Singapore.

18  
19  
20  
21 Registration: [www.clinicaltrials.gov](http://www.clinicaltrials.gov). Registration ID: NCT03348566

22  
23 **Running title:** Genetic adaptation, fish, and weight change

24  
25 **Word count:** 3420

26  
27  
28  
29  
30  
31  
32  
33 **\*Correspondence and requests for reprint:**

34  
35 Dr. Tao Huang. Department of Epidemiology and Biostatistics, School of Public Health, Peking University,  
36  
37 Beijing, China. Email: [huangtao@bjmu.edu.cn](mailto:huangtao@bjmu.edu.cn)

38  
39 Dr. Lu Qi. Department of Epidemiology, School of Public Health and Tropical Medicine, Tulane  
40  
41 University. 1440 Canal Street, Suite 1724, New Orleans, LA 70112

42  
43 Telephone: 504-988-3549;

44  
45 Email: [lqi1@tulane.edu](mailto:lqi1@tulane.edu); [luqi@hsph.harvard.edu](mailto:luqi@hsph.harvard.edu)  
46  
47  
48  
49  
50  
51  
52  
53  
54  
55  
56  
57  
58  
59  
60

## 1 Abstract

2 **Objective:** We tested whether genetic variants near fatty acid desaturases gene (*FADS*) cluster, which  
3 were recently identified to be signatures of adaptation to fish- and n-3 PUFAs-rich diet, interacted with  
4 these dietary factors on change in body mass index (BMI).

5 **Design:** Three *FADS* variants were examined for gene-diet interactions on long-term (~10 years) changes  
6 in BMI and body weight were tested in three prospective cohort studies.

7 **Setting:** Population based study

8 **Participants:** 11,323 women from the Nurses' Health Study (NHS), 6,833 men from the Health  
9 Professionals Follow-up Study (HPFS), and replicated in 6,254 women from the Women's Health  
10 Initiative (WHI), and 5,264 Chinese from the Singapore Chinese Health Study (SCHS).

11 **Main outcomes:** Long-term (~10 years) changes in BMI and body weight

12 **Results:** In the NHS and HPFS cohorts, food-sourced n-3 PUFAs intake showed interactions with the  
13 *FADS* rs174570 on changes of BMI (P for interaction = 0.02 in NHS, 0.05 in HPFS, and 0.007 in  
14 combined). Such interactions were replicated in two independent cohorts WHI and SCHS (P for  
15 interaction = 0.04 in WHI, 0.02 in SCHS, and 0.001 in combined). The genetic associations of the *FADS*  
16 rs174570 with changes in BMI increased across the tertiles of n-3 PUFAs in all the cohorts. Fish intake  
17 also accentuated the genetic associations of the *FADS* rs174570 with long-term changes in BMI (pooled P  
18 for interaction = 0.006). Viewed differently, long chain n-3 PUFAs intake showed stronger association  
19 with long-term changes in BMI among the rs174570 T carriers (beta = 0.79 kg/m<sup>2</sup> per g, P = 3×10<sup>-5</sup>) than  
20 the rs174570 non-T carriers (beta=0.16 kg/m<sup>2</sup> per g, P = 0.08). Similar results were observed for fish  
21 intake.

22 **Conclusions:** Our analyses provide replicable evidence that long chain n-3 PUFAs and fish intakes may  
23 interact with the *FADS* variant on long-term weight gain.

## 24 Article summary

## 25 Strengths and limitations of this study

- 27 • This is the first study with consistent results from 4 well-established prospective cohorts of different
- 28 racial populations such as Caucasians with European ancestry and Singapore Chinese.
- 29 • The consistent results from these independent cohorts demonstrated the robustness of our findings.
- 30 • Unlike cross-sectional studies, our prospective analysis minimized the potential reverse causation.

## 32 **Introduction**

33 Diet rich in fish and marine fatty acids especially long chain n-3 polyunsaturated fatty acids (PUFAs) has  
34 shown beneficial effects on cardiometabolic health<sup>1,2</sup>, however, data from population studies on the  
35 associations between such diet and body weight are inconsistent<sup>3,4</sup>. Emerging evidence suggests genetic  
36 variations may play a role in modifying the relation between dietary factors and body weight<sup>5-7</sup>.

37  
38 A recent study of Inuit identified genetic signatures of adaptation to diets rich in fish and n-3 PUFAs<sup>8</sup>. The  
39 strong signals locate in a cluster of fatty acid desaturases gene (*FADS*) that determine PUFAs levels<sup>8</sup>.  
40 People living in the Arctic region have been found to be genetically prone to develop obesity<sup>9,10</sup> as survival  
41 strength for energy storage<sup>11,12</sup>. Interestingly, the identified *FADS* genetic signatures of diet adaptation have  
42 been also related to adiposity in the Inuit population<sup>8</sup>. Of note, due to long-standing selection pressure, the  
43 identified *FADS* signatures differ in frequency of selective allele across various populations such as  
44 Europeans and Asians<sup>13</sup>, in coincidence with varying levels of fish/marine fatty acids consumption, and  
45 adiposity patterns in these populations<sup>14</sup>. We therefore hypothesized that the genetic signatures might  
46 interact with fish and marine PUFAs intakes on body weight<sup>13</sup>.

47  
48 The present study tested the interactions between n-3 PUFAs and fish intakes and variants in *FADS* gene  
49 cluster, genetic signatures of adaptation to fish- and n-3 PUFAs-rich diet, in relation to long-term changes in  
50 body mass index (BMI) in two US prospective cohorts: the Nurses' Health Study (NHS) and the Health  
51 Professionals Follow-up Study (HPFS). We replicated the findings in two independent, prospective cohorts  
52 the Women's Health Initiative (WHI) and the Singapore Chinese Health Study (SCHS).

1  
2  
3 53  
45 54 **Methods**6  
7 55 **Discovery cohorts**8  
9 56 *The Nurses' Health Study*

10  
11 57 The NHS began in 1976, when 121,700 female registered nurses aged 30-55 y residing in 11 states were  
12  
13 58 recruited to complete a baseline questionnaire about their lifestyle and medical history<sup>15</sup>. The current  
14  
15 59 analysis baseline was set in 1990 for the NHS. We included 11,323 women of European ancestry. Informed  
16  
17 60 consent was obtained from all participants. The DNA extraction methods, quality control measures, SNPs  
18  
19 61 genotyping and imputation when performed have been described in detail elsewhere<sup>16-22</sup>. All participants  
20  
21 62 with baseline long chain n-3 PUFAs and fish consumptions and covariates data, baseline and endpoint BMI  
22  
23 63 data, and genotyping data available based on previous GWASs were included<sup>16-21</sup>. The study protocol was  
24  
25 64 approved by the institutional review boards of Brigham and Women's Hospital and Harvard School of  
26  
27 65 Public Health.  
28  
29

30 66

31  
32 67 *The Health Professionals Follow-up Study*

33  
34 68 The HPFS was initiated in 1986, and was composed of 51,529 male dentists, pharmacists, veterinarians,  
35  
36 69 optometrists, osteopathic physicians, and podiatrists, aged 40-75 y at baseline. The male participants  
37  
38 70 returned a baseline questionnaire about detailed medical history, lifestyle, and usual diet<sup>23</sup>. In the current  
39  
40 71 analysis, we used 1990 as baseline in the HPFS, when the earliest complete dietary data were collected. Our  
41  
42 72 analysis included 6,833 men whose genotype data were available. Informed consent was obtained from all  
43  
44 73 participants. The DNA extraction methods, quality control measures, SNPs genotyping and imputation  
45  
46 74 when performed have been described in detail elsewhere<sup>16-22</sup>. All participants with baseline long chain n-3  
47  
48 75 PUFAs and fish consumptions and covariates data, baseline and endpoint BMI data, and genotyping data  
49  
50 76 available based on previous GWASs were included<sup>16-21</sup>. The study protocol was approved by the  
51  
52 77 institutional review boards of Brigham and Women's Hospital and Harvard School of Public Health.  
53  
54

55  
56 78  
57  
58  
59  
60



## 79 **Replication cohorts**

### 80 ***The Women's Health Initiative (WHI)***

81 The Women's Health Initiative (WHI) is a large, multiethnic, 40-center study funded by the National Heart,  
82 Lung, and Blood Institute (NHLBI) that focuses on strategies for preventing heart disease, breast and  
83 colorectal cancer, and osteoporotic fractures in postmenopausal women. A full description of the WHI study  
84 is presented elsewhere<sup>24,25</sup>. For the analyses, all participants with baseline long chain n-3 PUFAs and fish  
85 consumptions and covariates data, baseline and endpoint BMI data, and genotyping data available based on  
86 previous GWASs were included. Finally, we included 6,254 Caucasians women with European ancestry  
87 who participated in the WHI clinical trial studies at baseline (1994-1998) and at sixth-year follow-up and for  
88 whom DNA was measured. The genomic DNA samples were processed according to standard Affymetrix  
89 procedures for processing of the assay. The Affymetrix Human SNP Array 6.0 (Affymetrix®, Inc Santa  
90 Clara, CA) was used for genome wide SNP genotyping. Human subjects review committees at each  
91 participating institution reviewed and approved the study, and all women gave written informed consent.

### 93 ***The Singapore Chinese Health Study (SCHS) cohort***

94 The design of Singapore Chinese Health Study (SCHS) has been previously described in detail<sup>26</sup>. Briefly,  
95 between 1993 and 1998, 63,257 Chinese men and women between ages of 45 and 74 years living in  
96 Singapore were enrolled into the cohort study<sup>27</sup>. Two follow-up interviews were conducted via telephone  
97 among surviving participants between 1999 and 2004, and again between 2006 and 2010 to update  
98 information on body weight, selected lifestyle factors and medical history. All participants have given  
99 informed consent. The study was approved by the Institutional Review Boards of the National University of  
100 Singapore and the University of Pittsburgh, and the study was carried out in accordance with the approved  
101 guidelines. All participants with baseline long chain n-3 PUFAs and fish consumptions and covariates data,  
102 baseline and endpoint BMI data available were included. Among these participants, genome-wide  
103 genotyping for 2615 incident diabetes cases and 2615 matched controls was performed at the Genome  
104 Institute of Singapore according to the manufacturer's recommendations using an Affymetrix ASI (Asian)

1  
2  
3 105 Axiom array. Genotype calling was performed by the Affymetrix Corporation<sup>28</sup>. Genome-wide  
4  
5 106 genotyping for 717 incident myocardial infarction (MI) cases and 644 controls was performed for SCHS  
6  
7 107 samples using the Illumina HumanOmni ZhongHua-8 Bead Chip<sup>29</sup>.

8  
9 108 Among these two case-control studies nested within the cohort, 5,264 subjects with genotyping data had  
10  
11 109 both weight reported at both baseline and follow-up 2 interviews, and were included in this analysis.  
12  
13

14 110

### 15 111 **Assessment of measures of body mass index**

16  
17 112 Height and body weight were assessed by questionnaire at baseline, and weight information was requested  
18  
19 113 on follow-up questionnaire in all 4 cohorts. Self-reported weights were highly correlated with directly  
20  
21 114 measured values ( $r=0.97$  in HPFS and NHS) in a validation study<sup>30</sup>. BMI was calculated as body weight  
22  
23 115 (kg)/height (m<sup>2</sup>). We defined long-term changes in BMI as changes in BMI from 1990 to 2000 in the NHS  
24  
25 116 and HPFS cohorts<sup>31</sup>, and from baseline (1993) to sixth year follow-up in the WHI<sup>24,25</sup>, and from baseline  
26  
27 117 (1998) to second follow-up (2004) in the SCHS.  
28  
29

30 118

### 31 119 **Assessment of diets and other covariates**

32  
33 120 Questionnaires were used to collect information on a medical history and diet/lifestyle factors in all 4  
34  
35 121 cohorts. Total fish, n-3 PUFAs, supplemental use of fish oil, alcohol, sugar sweetened beverages, fried  
36  
37 122 food intakes, and other dietary factors at baseline were assessed by validated food frequency questionnaires  
38  
39 123 (FFQ) in the NHS and HPFS<sup>32,33</sup>. A 165-item validated semi-quantitative FFQ was used to collect dietary  
40  
41 124 data and supplemental use of fish oil in the SCHS<sup>27</sup>. Dietary data and supplemental use of fish oil were  
42  
43 125 obtained from a self-administered baseline 122-items validated FFQ in the WHI<sup>34</sup>. Alternate health eating  
44  
45 126 index was previously calculated in the NHS, HPFS<sup>35</sup>, WHI, and SCHS respectively. Physical activity was  
46  
47 127 expressed as metabolic equivalents per week by incorporating the reported time spent on various activities,  
48  
49 128 and the intensity level of each activity. The validity of the self-reported physical activity data has been  
50  
51 129 described previously in the NHS and HPFS<sup>36</sup>. In the WHI, an estimated metabolic equivalent (MET) level  
52  
53 130 for each type of activity was assigned from a compendium of activities<sup>37</sup>. Physical activity was assessed  
54  
55  
56  
57  
58  
59

1  
2  
3 131 using eight continuous categories ranging from never to 31 hours or more in an average week spent doing  
4  
5 132 strenuous sports; vigorous work; and moderate activities in the SCHS <sup>26</sup>.

6  
7 133  
8  
9 134 **The *FADS* variants selection and genotyping**  
10  
11 135 Three of the 6 *FADS* single-nucleotide polymorphisms (SNPs) reported in a recent scan of Inuit genomes  
12  
13 136 for signatures of adaptation <sup>8</sup> were derived from genome-wide scans available in the NHS, HPFS. We  
14  
15 137 assumed that each SNP in the panel acts independently in an additive manner. We coded the SNPs as  
16  
17 138 following: rs174570 (TT=2, TC=1, CC=0); rs174602 (TT=2, TC=1, CC=0); rs7115739 (TT=2, TG=1,  
18  
19 139 GG=0). The *FADS* rs174570 was extracted from GWAS data in the WHI and SCHS cohorts for replication  
20  
21  
22 140 **(Supplemental Table 1).**  
23

24 141

#### 25 26 142 **Patient and Public Involvement**

27  
28 143 patients and or public were not involved.  
29

30 144

#### 31 32 145 **Statistical analyses**

33  
34 146 We examined the associations of the *FADS* variants (rs174570, rs174602, rs7115739) with adiposity  
35  
36 147 measures and long-term changes in BMI using general linear models. Interactions between the *FADS*  
37  
38 148 variants (rs174570, rs174602, rs7115739) and baseline fish intake, and total or food-sourced long chain n-3  
39  
40 149 PUFAs intakes on long-term changes in BMI were tested by including a multiplicative interaction term in  
41  
42 150 the models in the NHS and HPFS. The significant results for rs174570 were replicated in the WHI and  
43  
44 151 SCHS. Potential confounders considered in multivariable models were age, baseline physical activity,  
45  
46 152 baseline television watching, baseline smoking, baseline alcohol intake, baseline alternate healthy eating  
47  
48 153 index, and baseline total energy intake, sugar sweetened beverages (if available), fried food intake (if  
49  
50 154 available). We further tested the genetic associations with long-term changes in BMI according to long  
51  
52 155 chain n-3 PUFAs and fish intakes, and associations of long chain n-3 PUFAs and fish intakes with long-term  
53  
54 156 changes in BMI according to the *FADS* genotypes using general linear models after adjustment of potential  
55  
56  
57  
58  
59

1  
2  
3 157 confounders. Results across cohorts were pooled with inverse variance weighted meta-analyses by fixed  
4  
5 158 effects models (if  $P \geq 0.05$  for heterogeneity between studies) or random effects models (if  $P < 0.05$  for  
6  
7 159 heterogeneity between studies). Hardy-Weinberg equilibrium was tested using Chi-square test. All reported  
8  
9 160 P values are nominal and two sided. Statistical analyses were performed in SAS 9.3 (SAS Institute, Cary,  
10  
11 161 NC, USA).

12 162

## 13 14 15 16 163 **Results**

### 17 18 164 **Baseline characteristics of all participants in the NHS, HPFS, WHI and SCHS cohorts**

19  
20 165 **Table 1** shows the baseline characteristics for all participants in the NHS, HPFS, WHI, and SCHS cohorts.  
21  
22 166 The present study included 11,323 women with genetic data from the NHS cohort, 6,833 men with genetic  
23  
24 167 data from the HPFS cohort, 6,254 women from the WHI, and 5,264 Chinese from the SCHS. The  
25  
26 168 distribution of the *FADS* genetic variants in the 4 cohorts was shown in **Supplemental table 1**. We did not  
27  
28 169 observe any significant genetic association between the *FADS* rs174570 genotype and baseline BMI, and  
29  
30 170 long-term changes in BMI in three US cohorts ( $P > 0.05$ ), however, we found that the *FADS* genotype was  
31  
32 171 significantly associated with baseline BMI in the SCHS ( $P = 0.002$ ) (**Supplemental table 2**).

33 172

### 34 35 36 37 173 **Genetic associations with long-term changes in BMI according to LC n-3 PUFAs/fish intakes**

38  
39 174 We first tested interactions between the *FADS* genetic variants (rs174570, rs174602, rs7115739) and intakes  
40  
41 175 of various sourced long chain n-3 PUFAs and fish in the NHS and HPFS cohorts. We found that only *FADS*  
42  
43 176 rs174570 (C/T, with T as the common allele in Inuit, but rare allele in Europeans and Asians) showed  
44  
45 177 significant interaction with LC n-3 PUFAs/fish intakes. Food-sourced n-3 PUFAs (Eicosapentaenoic acid  
46  
47 178 (EPA) + Docosahexaenoic acid (DHA)) intake consistently magnified the genetic association with  
48  
49 179 long-term changes in BMI ( $P$  for interaction = 0.02 in NHS, 0.05 in HPFS, and 0.007 in combined cohorts)  
50  
51 180 (**Figure 1**). We successfully replicated our results in the WHI cohort ( $P$  for interaction = 0.04) and the  
52  
53 181 SCHS cohort ( $P$  for interaction = 0.02).

54 182

1  
2  
3 183 The pooled analyses of the 3 US (Caucasian) populations or all 4 cohorts showed that high intakes of  
4  
5 184 food-sourced n-3 PUFAs intake (P for interaction = 0.008 and 0.009, respectively) significantly  
6  
7 185 accentuated the genetic association of the *FADS* genotypes with long-term changes in BMI (**Figure 2**). No  
8  
9 186 significant heterogeneity in the interaction effect was observed among these cohorts. Differences in  
10  
11 187 long-term changes of BMI per T allele were -0.105 (SE 0.067), 0.027 (SE 0.064), and 0.120 (SE 0.067)  
12  
13 188 kg/m<sup>2</sup> across three tertiles of food-sourced n-3 PUFAs in pooled results from all the 4 cohorts.

15  
16 189  
17  
18 190 Individual food-sourced n-3 PUFAs such as EPA (pooled P for interaction=0.01) and DHA (pooled P for  
19  
20 191 interaction=0.003) showed similar interaction patterns; and the interactions remained significant when  
21  
22 192 supplemented n-3 PUFAs were considered (pooled P for interaction=0.007) (**Figure 2**).

23  
24 193  
25  
26 194 In addition, fish intake showed similar, though less significant, interaction patterns with the *FADS*  
27  
28 195 genotype on long-term changes in BMI in the NHS (P for interaction=0.16), HPFS (P for  
29  
30 196 interaction=0.09), WHI (P for interaction=0.09), SCHS (P for interaction=0.03) and combined results  
31  
32 197 (pooled P for interaction=0.006), and the differences in BMI changes per T allele were -0.096 (SE 0.071),  
33  
34 198 0.041 (SE 0.052), and 0.251 (SE 0.151) kg/m<sup>2</sup> across three categories ( $\leq 1$  serving/week, 1~6  
35  
36 199 servings/week, and  $\geq 1$  serving/day) of fish intake in combined results from all the 4 cohorts.

37  
38  
39 200  
40  
41 201 In addition, we did not observe significant interaction between two other genetic variants in *FADS* cluster  
42  
43 202 (rs174602 and rs7115739) and long chain n-3 PUFAs/fish intakes in relation to long-term changes in BMI  
44  
45 203 in the NHS and HPFS cohorts. Similar interactions for long-term changes in body weight were observed  
46  
47 204 (**Supplemental table 3 & 4**).

48  
49 205  
50  
51 206 **Long chain n-3 PUFAs/fish intakes and long-term changes in BMI according to the *FADS* genotype**

52  
53 207 We found that individuals who consumed the highest food-sourced n-3 PUFAs (EPA+DHA; T3) had  
54  
55 208 significantly greater increase of BMI (mean  $\pm$  SE = 0.74 $\pm$ 0.06, kg/m<sup>2</sup>) than did those who consumed the

lowest (T1) (mean  $\pm$  SE =  $0.39 \pm 0.07$ , kg/m<sup>2</sup>) among the T allele carriers, whereas the corresponding BMI changes were  $0.68 \pm 0.03$  kg/m<sup>2</sup> and  $0.49 \pm 0.03$  kg/m<sup>2</sup>, respectively, among the non-T carriers in 4 cohorts combined (**Table 2 & Supplemental table 5**). Similarly, we observed different associations between fish intake and BMI changes among the T allele carriers ( $P = 1.5 \times 10^{-6}$ ) and non-carriers ( $P = 0.01$ ) in the pooled results from these US cohorts. No significant heterogeneity in the interaction effect was observed among the cohorts.

**Figure 3** presents the predicted long-term changes in BMI from food-sourced n-3 PUFAs and fish intake according to the T carriers and the non-T carriers. Results from the NHS, HPFS and WHI cohorts consistently showed that the associations of food-sourced n-3 PUFAs and fish intakes with long-term changes in BMI were stronger among the T carriers than those among the non-T carriers. In the pooled results, the beta  $\pm$  SE for associations of food-sourced n-3 PUFAs (**Figure 3**) and fish intake (**Figure 4**) with long-term changes in BMI were  $0.79 \pm 0.19$  kg/m<sup>2</sup> per g ( $P = 0.000003$ ) and  $0.64 \pm 0.16$  kg/m<sup>2</sup> per serving ( $P = 0.00002$ ) among the T carriers, and whereas the corresponding beta  $\pm$  SE were  $0.16 \pm 0.10$  kg/m<sup>2</sup> per g ( $P = 0.08$ ) and  $0.18 \pm 0.08$  kg/m<sup>2</sup> per serving ( $P = 0.01$ ) among the non-T carriers.

## Discussion

In 4 large prospective cohorts of the US and Chinese populations, we found reproducible evidence that long chain n-3 PUFAs and fish intakes accentuated the genetic association of the *FADS* genotypes with long-term changes in BMI. In addition, our results showed that the *FADS* rs174570 T allele carriers gained more weight than the non-carriers when they had higher long chain n-3 PUFAs and fish intakes.

Large prospective cohort studies examining the associations of fish or n-3 PUFAs with body weight and obesity risk generated conflicting results<sup>3 4</sup>. In addition, several randomized controlled trials (RCTs) supported the protective effects of fish, fish oils, or/and n-3 PUFAs intake on weight-loss<sup>38-40</sup>, but the benefit was not evident in other trials<sup>41-43</sup>. The results from the current study lent support to our

1  
2  
3 235 hypothesis that the heterogeneous associations between fish or n-3 PUFAs and body weight might be at  
4  
5 236 least partly due to gene-diet interactions.  
6

7 237  
8  
9 238 We found that the genetic associations between the *FADS* rs174570 and long-term BMI change were  
10  
11 239 stronger along with increasing intakes of long chain n-3 PUFAs and fish. Viewed from a different angle,  
12  
13 240 the magnitude of associations of fish and long chain n-3 PUFAs intakes with BMI changes varied among  
14  
15 241 individuals with different genotypes. The *FADS* rs174570 was recently identified from a study of the Inuit,  
16  
17 242 who had high fish/n-3 PUFAs intakes<sup>8</sup>. The high frequency of T allele in Inuit reflects genetic adaptation to  
18  
19 243 the special fish- and n-3 PUFA rich diet. Interestingly, the identified *FADS* genetic signatures of diet  
20  
21 244 adaptation have been also related to adiposity in this population. Our data indicated that the signature allele  
22  
23 245 (T) was related differently with weight changes (decrease or increase), depending on the levels of fish/n-3  
24  
25 246 PUFAs intakes. In people with high fish/n-3 PUFAs intakes, carrying the signature allele predisposed to  
26  
27 247 greater weight gain and an increased risk of obesity; while carriers of this allele tended to have less body  
28  
29 248 weight when they are exposed to diet low in fish and n-3 PUFAs.  
30  
31

32 249  
33  
34 250 We found that individual food-sourced n-3 PUFAs such as EPA and DHA showed similar interaction  
35  
36 251 patterns in relation to long-term changes in BMI; and the interactions also remained significant when  
37  
38 252 supplemented n-3 PUFAs were considered. In addition, our results indicated that the interactions of  
39  
40 253 fish/n-3 PUFAs intakes and the *FADS* genotype were persistent across different racial populations such as  
41  
42 254 Europeans and Asians. Our data suggest that the interactions between n-3 PUFAs and the *FADS* genotype is  
43  
44 255 robust for fatty acids from various sources.  
45  
46

47 256  
48  
49 257 The mechanisms underlying the observed gene-diet interactions remain unclear, however, such  
50  
51 258 interactions are biologically plausible. It has long been known that the *FADS* genes such as  
52  
53 259 *FADS1* and *FADS2* encode delta-5 and delta-6 desaturases respectively, which are the important  
54  
55 260 rate-limiting steps in the endogenous formation of long-chain PUFA such as EPA and DHA from linoleic  
56  
57  
58  
59

1  
2  
3 261 acid (n-6) and  $\alpha$ -linolenic acid (n-3)<sup>44</sup>. The selected allele of *FADS* rs174570 is significantly associated  
4  
5 262 with an increase in the concentration of n-3 fatty acids upstream in the n-3 synthesis pathway<sup>44</sup>. In  
6  
7 263 addition, it has been reported that dietary n-3 PUFAs might regulate adipocyte *FADS* expression and  
8  
9 264 function<sup>45</sup>. In addition, storage of energy and body fat is very important for the Arctic population, who are  
10  
11 265 regularly exposed to the extreme low temperature and fishes rich in n-3 PUFAs<sup>11 12</sup>. Under natural  
12  
13 266 selection, these people are genetically prone to high fish intake to keep body fat<sup>9 10</sup>. Therefore, it's not  
14  
15 267 surprising that high fish or n-3 PUFAs intake accentuated genetic susceptibility to obesity among people  
16  
17 268 carrying selective *FADS* signature<sup>46 47</sup>. Our findings support the view that extra n-3 PUFAs may not do  
18  
19 269 much benefit at all for Europeans with selective *FADS* signature<sup>8 13</sup>.

## 22 270 **Strengths**

23  
24 271 Several strengths of this study merit mention. To our knowledge, this is the first study with consistent results  
25  
26 272 from 4 well-established prospective cohorts of different racial populations such as Caucasians with  
27  
28 273 European ancestry and Singapore Chinese. The consistent results from these independent cohorts  
29  
30 274 demonstrated the robustness of our findings. Other major strengths include the prospective design, the large  
31  
32 275 sample size, use of long-term change of BMI, and replication of the results. Although we prospectively  
33  
34 276 analyzed the data, we cannot exclude the possibility of reverse causality as this is a study on dietary intake  
35  
36 277 and BMI or weight change from the baseline, which by default builds in the starting point (i.e. the cross  
37  
38 278 sectional association).

## 41 279 **Limitations**

42  
43 280 However, several limitations need to be acknowledged. First, dietary fatty acids, fish, and adiposity  
44  
45 281 measures were self-reported, measurement errors in these variables are inevitable; however, the food  
46  
47 282 frequency questionnaires and adiposity measures data have been well validated<sup>27 30 32-34</sup>. Second,  
48  
49 283 confounding by other unmeasured or unknown factors might exist, although we have carefully adjusted for  
50  
51 284 multiple dietary and lifestyle factors. Third, a causal relation among long chain n-3 PUFAs and fish  
52  
53 285 consumption, and adiposity cannot be inferred from an observational study. Fourth, all subjects with genetic  
54  
55 286 data were selected in each cohort. The source of genotyping data was diverse (e.g. sub-cohort, case control  
56  
57  
58  
59  
60



1  
2  
3 287 studies), therefore, subject selection might be a major source of bias. Fifth, we acknowledge that the  
4  
5 288 different methods in measuring anthropometric traits, genetic variants and food intake across cohorts might  
6  
7 289 introduce bias in the present analyses. Finally, the participants included in our study were middle aged and  
8  
9 290 older adults of Caucasians with European ancestry in the US and Chinese in Singapore, and it is unknown  
10  
11 291 whether our findings could be generalized to other demographic or ethnic groups.

## 13 292 **Conclusions**

15 293 In summary, our data provides reproducible evidence from 4 multiethnic cohorts that high long chain n-3  
16  
17 294 PUFAs and fish intakes accentuate the genetic association of the *FADS* with adiposity. These findings  
18  
19 295 emphasize the importance of considering precision nutritional interventions on prevention and treatment  
20  
21 296 of obesity.  
22  
23

24 297  
26 298 **Contributors:** TH and LQ designed the study and wrote the first draft. TH analyzed the data. FBH  
27  
28 299 provided statistical expertise. TW, YH, DS, LH, CSF, JW, LRP, AT, GC, IDV, HKC, JF, XS, CCK, YF, RM,  
29  
30 300 HCK, JY, KWP, and LQ were involved in data collection. TH and LQ are guarantors. All authors  
31  
32 301 contributed to the interpretation of the results and critical revision of the manuscript for important  
33  
34 302 intellectual content and approved the final version of the manuscript.

35  
36 303 We acknowledge Dr. Gary C. Curhan's contribution to the genetic data.  
37  
38

39 304

## 41 305 **Funding**

42  
43 306 This study was supported by grants HL126024, HL034594, DK100383, DK091718, HL071981,  
44  
45 307 HL073168, CA87969, CA49449, CA055075, HL34594, HL088521, U01HG004399, DK080140,  
46  
47 308 P30DK46200, U01CA137088, U54CA155626, DK58845, DK098311, U01HG004728, EY015473,  
48  
49 309 CA134958, DK70756 and DK46200 from the National Institutes of Health, with additional support for  
50  
51 310 genotyping from Merck Research Laboratories, North Wales, PA. LQ is a recipient of the American Heart  
52  
53 311 Association Scientist Development Award (0730094N). LRP is supported by the Arthur Ashley Williams  
54  
55 312 Foundation and a Harvard Ophthalmology Scholar Award (Harvard Medical School) from the Harvard  
56  
57  
58  
59

1  
2  
3 313 Glaucoma Center of Excellence. ATC is a Damon Runyon Cancer Foundation Clinical Investigator. The  
4  
5 314 SCHS study is supported by the National Institutes of Health, USA (NCI R01 CA144034, UM1  
6  
7 315 CA182876, R01 DK080720), the Singapore National Medical Research Council (NMRC 1270/2010), the  
8  
9 316 HUI-CREATE Programme of the National Research Foundation, Singapore (Project Number 370062002)  
10  
11 317 and Biomedical Research Council, Singapore. The funding sources had no role in the design or conduct of  
12  
13 318 the study; collection, management, analysis, and interpretation of the data; or preparation, review, or  
14  
15 319 approval of the manuscript.  
16  
17

18 320  
19  
20 321 **Declaration of interests:** All authors have no conflict of interest to declare. No support from any  
21  
22 322 organization for the submitted work; no financial relationships with any organizations that might have an  
23  
24 323 interest in the submitted work in the previous three years, no other relationship or activity that could  
25  
26 324 appear to have influenced the submitted work.  
27

28 325

29  
30 326

31  
32 327 **Data sharing**

33  
34 328 No additional data available.  
35  
36  
37  
38  
39  
40  
41  
42  
43  
44  
45  
46  
47  
48  
49  
50  
51  
52  
53  
54  
55  
56  
57  
58  
59  
60

## References

1. Del Gobbo LC, Imamura F, Aslibekyan S, Marklund M, Virtanen JK, Wennberg M, et al. omega-3 Polyunsaturated Fatty Acid Biomarkers and Coronary Heart Disease: Pooling Project of 19 Cohort Studies. *JAMA internal medicine* 2016;176(8):1155-66.
2. Hu FB, Bronner L, Willett WC, Stampfer MJ, Rexrode KM, Albert CM, et al. Fish and omega-3 fatty acid intake and risk of coronary heart disease in women. *Jama* 2002;287(14):1815-21.
3. He K, Rimm EB, Merchant A, Rosner BA, Stampfer MJ, Willett WC, et al. Fish consumption and risk of stroke in men. *Jama* 2002;288(24):3130-6.
4. Iso H, Rexrode KM, Stampfer MJ, Manson JE, Colditz GA, Speizer FE, et al. Intake of fish and omega-3 fatty acids and risk of stroke in women. *Jama* 2001;285(3):304-12.
5. Qi L, Cho YA. Gene-environment interaction and obesity. *Nutrition reviews* 2008;66(12):684-94.
6. Qi Q, Chu AY, Kang JH, Huang J, Rose LM, Jensen MK, et al. Fried food consumption, genetic risk, and body mass index: gene-diet interaction analysis in three US cohort studies. *BMJ* 2014;348:g1610.
7. Qi Q, Chu AY, Kang JH, Jensen MK, Curhan GC, Pasquale LR, et al. Sugar-sweetened beverages and genetic risk of obesity. *The New England journal of medicine* 2012;367(15):1387-96.
8. Fumagalli M, Moltke I, Grarup N, Racimo F, Bjerregaard P, Jorgensen ME, et al. Greenlandic Inuit show genetic signatures of diet and climate adaptation. *Science* 2015;349(6254):1343-7.
9. Hegele RA, Anderson C, Young TK, Connelly PW. G-protein beta3 subunit gene splice variant and body fat distribution in Nunavut Inuit. *Genome research* 1999;9(10):972-7.
10. Hegele RA, Huff MW, Young TK. Common genomic variation in LMNA modulates indexes of obesity in Inuit. *The Journal of clinical endocrinology and metabolism* 2001;86(6):2747-51.
11. Jorgensen ME, Bjerregaard P, Borch-Johnsen K. Diabetes and impaired glucose tolerance among the inuit population of Greenland. *Diabetes Care* 2002;25(10):1766-71.
12. Jorgensen ME, Glumer C, Bjerregaard P, Gyntelberg F, Jorgensen T, Borch-Johnsen K. Obesity and central fat pattern among Greenland Inuit and a general population of Denmark (Inter99): relationship to metabolic risk factors. *International journal of obesity and related metabolic disorders : journal of the International Association for the Study of Obesity* 2003;27(12):1507-15.
13. Tishkoff S. GENETICS. Strength in small numbers. *Science* 2015;349(6254):1282-3.
14. Dewailly E, Blanchet C, Lemieux S, Sauve L, Gingras S, Ayotte P, et al. n-3 Fatty acids and cardiovascular disease risk factors among the Inuit of Nunavik. *The American journal of clinical nutrition* 2001;74(4):464-73.
15. Colditz GA, Manson JE, Hankinson SE. The Nurses' Health Study: 20-year contribution to the understanding of health among women. *Journal of women's health / the official publication of the Society for the Advancement of Women's Health Research* 1997;6(1):49-62.
16. Cornelis MC, Monda KL, Yu K, Paynter N, Azzato EM, Bennett SN, et al. Genome-wide meta-analysis identifies regions on 7p21 (AHR) and 15q24 (CYP1A2) as determinants of habitual caffeine consumption. *PLoS genetics* 2011;7(4):e1002033.
17. Jensen MK, Pers TH, Dworzynski P, Girman CJ, Brunak S, Rimm EB. Protein interaction-based genome-wide analysis of incident coronary heart disease. *Circulation. Cardiovascular genetics* 2011;4(5):549-56.
18. Wiggs JL, Kang JH, Yaspan BL, Mirel DB, Laurie C, Crenshaw A, et al. Common variants near CAV1 and CAV2 are associated with primary open-angle glaucoma in Caucasians from the USA. *Human molecular genetics* 2011;20(23):4707-13.
19. Hunter DJ, Kraft P, Jacobs KB, Cox DG, Yeager M, Hankinson SE, et al. A genome-wide association study identifies alleles in FGFR2 associated with risk of sporadic postmenopausal breast cancer. *Nature genetics* 2007;39(7):870-4.
20. Qi L, Cornelis MC, Kraft P, Stanya KJ, Linda Kao WH, Pankow JS, et al. Genetic variants at 2q24 are associated with susceptibility to type 2 diabetes. *Hum Mol Genet* 2010;19(13):2706-15.
21. Kottgen A, Albrecht E, Teumer A, Vitart V, Krumsiek J, Hundertmark C, et al. Genome-wide association analyses identify 18 new loci associated with serum urate concentrations. *Nature genetics* 2013;45(2):145-54.
22. Peters U, Jiao S, Schumacher FR, Hutter CM, Aragaki AK, Baron JA, et al. Identification of Genetic Susceptibility Loci for Colorectal Tumors in a Genome-Wide Meta-analysis. *Gastroenterology* 2013;144(4):799-807 e24.
23. Rimm EB, Giovannucci EL, Willett WC, Colditz GA, Ascherio A, Rosner B, et al. Prospective study of alcohol consumption and risk of coronary disease in men. *Lancet* 1991;338(8765):464-8.

24. Anderson GL, Manson J, Wallace R, Lund B, Hall D, Davis S, et al. Implementation of the Women's Health Initiative study design. *Annals of epidemiology* 2003;13(9 Suppl):S5-17.
25. Design of the Women's Health Initiative clinical trial and observational study. The Women's Health Initiative Study Group. *Controlled clinical trials* 1998;19(1):61-109.
26. Yuan JM, Stram DO, Arakawa K, Lee HP, Yu MC. Dietary cryptoxanthin and reduced risk of lung cancer: the Singapore Chinese Health Study. *Cancer epidemiology, biomarkers & prevention : a publication of the American Association for Cancer Research, cosponsored by the American Society of Preventive Oncology* 2003;12(9):890-8.
27. Hankin JH, Stram DO, Arakawa K, Park S, Low SH, Lee HP, et al. Singapore Chinese Health Study: development, validation, and calibration of the quantitative food frequency questionnaire. *Nutrition and cancer* 2001;39(2):187-95.
28. Chen Z, Pereira MA, Seielstad M, Koh WP, Tai ES, Teo YY, et al. Joint effects of known type 2 diabetes susceptibility loci in genome-wide association study of Singapore Chinese: the Singapore Chinese health study. *PLoS one* 2014;9(2):e87762.
29. Dorajoo R, Sun Y, Han Y, Ke T, Burger A, Chang X, et al. A genome-wide association study of n-3 and n-6 plasma fatty acids in a Singaporean Chinese population. *Genes & nutrition* 2015;10(6):53.
30. Rimm EB, Stampfer MJ, Colditz GA, Chute CG, Litin LB, Willett WC. Validity of self-reported waist and hip circumferences in men and women. *Epidemiology* 1990;1(6):466-73.
31. Huang T, Zheng Y, Qi Q, Xu M, Ley SH, Li Y, et al. DNA methylation variants at HIF3A locus, B vitamins intake, and long-term weight change: gene-diet interactions in two US cohorts. *Diabetes* 2015.
32. Willett WC, Sampson L, Stampfer MJ, Rosner B, Bain C, Witschi J, et al. Reproducibility and validity of a semiquantitative food frequency questionnaire. *Am J Epidemiol* 1985;122(1):51-65.
33. Rimm EB, Giovannucci EL, Stampfer MJ, Colditz GA, Litin LB, Willett WC. Reproducibility and validity of an expanded self-administered semiquantitative food frequency questionnaire among male health professionals. *Am J Epidemiol* 1992;135(10):1114-26; discussion 27-36.
34. Patterson RE, Kristal AR, Tinker LF, Carter RA, Bolton MP, Agurs-Collins T. Measurement characteristics of the Women's Health Initiative food frequency questionnaire. *Annals of epidemiology* 1999;9(3):178-87.
35. Chiuve SE, Fung TT, Rimm EB, Hu FB, McCullough ML, Wang M, et al. Alternative dietary indices both strongly predict risk of chronic disease. *The Journal of nutrition* 2012;142(6):1009-18.
36. Wolf AM, Hunter DJ, Colditz GA, Manson JE, Stampfer MJ, Corsano KA, et al. Reproducibility and validity of a self-administered physical activity questionnaire. *Int J Epidemiol* 1994;23(5):991-9.
37. Langer RD, White E, Lewis CE, Kotchen JM, Hendrix SL, Trevisan M. The Women's Health Initiative Observational Study: baseline characteristics of participants and reliability of baseline measures. *Annals of epidemiology* 2003;13(9 Suppl):S107-21.
38. Kabir M, Skurnik G, Naour N, Pechtner V, Meugnier E, Rome S, et al. Treatment for 2 mo with n 3 polyunsaturated fatty acids reduces adiposity and some atherogenic factors but does not improve insulin sensitivity in women with type 2 diabetes: a randomized controlled study. *The American journal of clinical nutrition* 2007;86(6):1670-9.
39. Munro IA, Garg ML. Prior supplementation with long chain omega-3 polyunsaturated fatty acids promotes weight loss in obese adults: a double-blinded randomised controlled trial. *Food & function* 2013;4(4):650-8.
40. Thorsdottir I, Tomasson H, Gunnarsdottir I, Gisladdottir E, Kiely M, Parra MD, et al. Randomized trial of weight-loss-diets for young adults varying in fish and fish oil content. *Int J Obes (Lond)* 2007;31(10):1560-6.
41. Munro IA, Garg ML. Dietary supplementation with n-3 PUFA does not promote weight loss when combined with a very-low-energy diet. *The British journal of nutrition* 2012;108(8):1466-74.
42. Crochemore IC, Souza AF, de Souza AC, Rosado EL. omega-3 polyunsaturated fatty acid supplementation does not influence body composition, insulin resistance, and lipemia in women with type 2 diabetes and obesity. *Nutrition in clinical practice : official publication of the American Society for Parenteral and Enteral Nutrition* 2012;27(4):553-60.
43. Bender N, Portmann M, Heg Z, Hofmann K, Zwahlen M, Egger M. Fish or n3-PUFA intake and body composition: a systematic review and meta-analysis. *Obesity reviews : an official journal of the International Association for the Study of Obesity* 2014;15(8):657-65.
44. Ameur A, Enroth S, Johansson A, Zaboli G, Igl W, Johansson AC, et al. Genetic adaptation of fatty-acid metabolism: a human-specific haplotype increasing the biosynthesis of long-chain omega-3 and omega-6

1  
2  
3  
4  
5  
6  
7  
8  
9  
10  
11  
12  
13  
14  
15  
16  
17  
18  
19  
20  
21  
22  
23  
24  
25  
26  
27  
28  
29  
30  
31  
32  
33  
34  
35  
36  
37  
38  
39  
40  
41  
42  
43  
44  
45  
46  
47  
48  
49  
50  
51  
52  
53  
54  
55  
56  
57  
58  
59  
60

fatty acids. *Am J Hum Genet* 2012;90(5):809-20.

45. Ralston JC, Matravada S, Gaudio N, Holloway GP, Mutch DM. Polyunsaturated fatty acid regulation of adipocyte FADS1 and FADS2 expression and function. *Obesity (Silver Spring)* 2015;23(4):725-8.

46. Smith GI, Julliand S, Reeds DN, Sinacore DR, Klein S, Mittendorfer B. Fish oil-derived n-3 PUFA therapy increases muscle mass and function in healthy older adults. *The American journal of clinical nutrition* 2015;102(1):115-22.

47. Jourdan C, Kloiber S, Nieters A, Seiler H, Himmerich H, Kohli MA, et al. Gene-PUFA interactions and obesity risk. *The British journal of nutrition* 2011;106(8):1263-72.

For peer review only

**Table 1 Baseline characteristics of all participants in the NHS, HPFS, WHI, and SCHS cohorts.**

|                                                | NHS <sup>1</sup> | HPFS          | WHI          | SCHS                     |
|------------------------------------------------|------------------|---------------|--------------|--------------------------|
|                                                | n=11,323         | n=6,833       | n=6,254      | n=5,264                  |
| Age (year)                                     | 57 ± 9           | 57 ± 11       | 68 ± 5       | 56 ± 7                   |
| Female (%)                                     | 100              | 0             | 100          | 58.7                     |
| Body weight (kg)                               | 70.1 ± 14.9      | 82.8 ± 12.5   | 73.7 ± 15.0  | 60.3 ± 9.8               |
| Body mass index (kg/m <sup>2</sup> )           | 26.2 ± 5.1       | 25.9 ± 3.3    | 28.3 ± 5.5   | 23.4 ± 3.3               |
| Alcohol consumption (g/day)                    | 5.14 ± 9.23      | 10.97 ± 15.05 | 6.00 ± 11.96 | 1.97 ± 8.02              |
| Physical activity (MET-h/week)                 | 19.3 ± 22.1      | 36.9 ± 39.5   | 11.6 ± 13.1  | 0.5 ± 1.0 <sup>2</sup>   |
| Television watching (h/week)                   | 17.5 ± 14.8      | 10.5 ± 8.2    | /            | 2.2 ± 0.8                |
| Current smokers (n, (%))                       | 1557(13.8)       | 493(7.3)      | 407(15.0)    | 1364(20.0)               |
| Total energy intake (kcal/day)                 | 1766 ± 502       | 1949 ± 578    | 1602 ± 654   | 1606 ± 573               |
| Alternative health eating index score          | 53.4 ± 10.8      | 53.8 ± 11.4   | 53.5 ± 10.6  | 55.8 ± 8.2               |
| Sugar sweetened beverage intake (servings/day) | 0.13 ± 0.39      | 0.23 ± 0.48   | 0.39 ± 0.82  | 0.69 ± 2.40 <sup>3</sup> |
| Total fried food (servings/day)                | 0.12 ± 0.20      | 0.22 ± 0.28   | /            | /                        |
| Fish intake (servings/day)                     | 0.31 ± 0.29      | 0.33 ± 0.30   | 0.23 ± 0.20  | 0.16 ± 0.07              |
| Food-sourced EPA (g/day)                       | 0.08 ± 0.14      | 0.12 ± 0.20   | 0.04 ± 0.04  | /                        |
| Food-sourced DHA (g/day)                       | 0.17 ± 0.14      | 0.22 ± 0.19   | 0.07 ± 0.07  | /                        |
| Food-sourced EPA+DHA (g/day)                   | 0.23 ± 0.19      | 0.31 ± 0.25   | 0.11 ± 0.10  | 0.33 ± 0.20              |
| Total EPA+DHA (g/day)                          | 0.26 ± 0.27      | 0.35 ± 0.37   | 0.38 ± 0.48  | /                        |

<sup>1</sup>Plus-minus values are means ± SD. <sup>2</sup>Hours per week of moderate activity in the SCHS. <sup>3</sup>Glasses per week of soda intake in the SCHS.

EPA: 20:5n-3; DHA: 22:6n-3; MET denotes metabolic equivalents. Total EPA+DHA includes food-sourced and supplemental EPA+DHA.

Data on BMI, long chain n-3 PUFAs and fish consumptions were assessed at baseline in the NHS (1990), the HPFS (1990), the WHI (1994-1998), and the SCHS (1993-1998), respectively. Television watching assessed in 1992 for NHS and in 1990 for HPFS.

**Table 2 Associations of long chain n-3 PUFAs and fish intakes with long-term changes in BMI according to *FADS* genotypes**

| <i>FADS</i> genotypes              |                | Three categories of long chain n-3 PUFAs and fish intakes |            |            | P for trend          | P for interaction* |
|------------------------------------|----------------|-----------------------------------------------------------|------------|------------|----------------------|--------------------|
|                                    |                | ≤1/wk                                                     | 1~6/wk     | ≥1/d       |                      |                    |
| <b>Total fish, serving/day</b>     |                |                                                           |            |            |                      |                    |
| NHS                                | Non-T carriers | 0.82±0.06                                                 | 0.98±0.04  | 1.15±0.13  | 0.006                | 0.03               |
|                                    | T carriers     | 0.73±0.11                                                 | 0.95±0.08  | 1.55±0.25  | 0.0007               |                    |
| HPFS                               | Non-T carriers | 0.43±0.05                                                 | 0.52±0.04  | 0.59±0.12  | 0.73                 | 0.03               |
|                                    | T carriers     | 0.21±0.11                                                 | 0.52±0.07  | 0.79±0.22  | 0.02                 |                    |
| WHI                                | Non-T carriers | 0.11±0.08                                                 | 0.28±0.06  | 0.28±0.34  | 0.04                 | 0.09               |
|                                    | T carriers     | 0.02±0.15                                                 | 0.29±0.11  | 0.94±0.67  | 0.01                 |                    |
| SCHS                               | Non-T carriers | -3.08±0.19                                                | -3.00±0.17 | -3.35±0.18 | 0.32                 | 0.01               |
|                                    | T carriers     | -3.61±0.17                                                | -3.10±0.15 | -3.25±0.17 | 0.13                 |                    |
| Pooled <sup>1</sup>                | Non-T carriers | 0.50±0.03                                                 | 0.67±0.03  | 0.81±0.08  | 0.01                 | 0.0007             |
|                                    | T carriers     | 0.38±0.07                                                 | 0.63±0.05  | 1.11±0.16  | 2×10 <sup>-4</sup>   |                    |
| <b>Food-sourced EPA+DHA, g/day</b> |                | Tertile1                                                  | Tertile2   | Tertile3   |                      |                    |
| NHS                                | Non-T carriers | 0.79±0.06                                                 | 0.92±0.05  | 1.11±0.06  | 0.01                 | 0.005              |
|                                    | T carriers     | 0.71±0.10                                                 | 0.84±0.11  | 1.19±0.11  | 0.0001               |                    |
| HPFS                               | Non-T carriers | 0.46±0.05                                                 | 0.53±0.05  | 0.49±0.05  | 0.79                 | 0.02               |
|                                    | T carriers     | 0.23±0.11                                                 | 0.48±0.10  | 0.58±0.09  | 0.02                 |                    |
| WHI                                | Non-T carriers | 0.02±0.08                                                 | 0.21±0.08  | 0.41±0.08  | 0.06                 | 0.04               |
|                                    | T carriers     | -0.03±0.15                                                | 0.29±0.14  | 0.35±0.15  | 0.004                |                    |
| SCHS                               | Non-T carriers | -3.32±0.17                                                | -3.15±0.18 | -2.99±0.17 | 0.16                 | 0.035              |
|                                    | T carriers     | -3.55±0.16                                                | -3.34±0.16 | -3.05±0.16 | 0.02                 |                    |
| Pooled <sup>1</sup>                | Non-T carriers | 0.49±0.03                                                 | 0.64±0.03  | 0.68±0.03  | 0.01                 | 0.0003             |
|                                    | T carriers     | 0.39±0.07                                                 | 0.57±0.06  | 0.74±0.06  | 1.5×10 <sup>-6</sup> |                    |
| <b>Total EPA+DHA, g/day</b>        |                | Tertile1                                                  | Tertile2   | Tertile3   |                      |                    |

|    |                     |                |           |           |           |      |       |
|----|---------------------|----------------|-----------|-----------|-----------|------|-------|
| 1  |                     |                |           |           |           |      |       |
| 2  |                     |                |           |           |           |      |       |
| 3  | NHS                 | Non-T carriers | 0.79±0.06 | 0.94±0.05 | 1.08±0.06 | 0.8  | 0.01  |
| 4  |                     |                |           |           |           |      |       |
| 5  |                     | T carriers     | 0.72±0.11 | 0.87±0.10 | 1.16±0.11 | 0.02 |       |
| 6  |                     |                |           |           |           |      |       |
| 7  | HPFS                | Non-T carriers | 0.47±0.05 | 0.53±0.05 | 0.49±0.05 | 0.88 | 0.13  |
| 8  |                     |                |           |           |           |      |       |
| 9  |                     | T carriers     | 0.23±0.10 | 0.50±0.09 | 0.57±0.10 | 0.16 |       |
| 10 |                     |                |           |           |           |      |       |
| 11 | WHI                 | Non-T carriers | 0.39±0.10 | 0.04±0.08 | 0.23±0.10 | 0.42 | 0.27  |
| 12 |                     |                |           |           |           |      |       |
| 13 |                     | T carriers     | 0.04±0.18 | 0.28±0.15 | 0.28±0.16 | 0.84 |       |
| 14 |                     |                |           |           |           |      |       |
| 15 | Pooled <sup>1</sup> | Non-T carriers | 0.57±0.04 | 0.62±0.03 | 0.67±0.04 | 0.65 | 0.005 |
| 16 |                     |                |           |           |           |      |       |
| 17 |                     | T carriers     | 0.39±0.07 | 0.60±0.06 | 0.74±0.07 | 0.01 |       |

---

Data are means ± SE for long term changes in BMI.

Total EPA+DHA include food-sourced and supplemental EPA+DHA.

<sup>1</sup>P for interaction was generated from dominant model of *FADS* rs174570 (CC vs CT+TT).

Numbers of T carriers/Non-T carriers in the NHS, HPFS, WHI, and SCHS are 1698/9625, 1025/5808, 876/5378, and 1842/3422, respectively.

Data on BMI, long chain n-3 PUFAs and fish consumptions were assessed at baseline in the NHS (1990), the HPFS (1990), the WHI (1994-1998), and the SCHS (1993-1998), respectively.

Data on follow-up BMI was assessed in 2000 in the NHS and HPFS, in the sixth follow-up year in the WHI, and from 2006 to 2010 in the SCHS, respectively.

Long-term BMI changes were calculated based on the changes in BMI from baseline to follow-up year in the four cohorts, respectively.

The general linear model was used to test the associations of long chain n-3 PUFAs and fish intakes with long-term changes in BMI by *FADS* genotypes after adjustment for age, source of genotyping data, baseline BMI, smoking, alcohol intake, physical activity, total energy intake, alternate healthy eating index, television watching, sugar sweetened beverage, fried food consumption.

The results were pooled by means of fixed effects meta-analyses (if  $P \geq 0.05$  for heterogeneity between studies).



## Figure Legends

### Figure 1 Genetic variant of *FADS* rs174570, long chain n-3 PUFAs and fish intakes and long-term BMI changes

Effect size (ES) (95% CI) values are  $\beta$  coefficients for interaction between the *FADS* variant rs174570 (additive model) and diets from results of the NHS, HPFS, WHI, and SCHS cohorts.

Data on BMI, long chain n-3 PUFAs (food sourced EPA+ DHA and total EPA+ DHA (food and supplemental use)) and fish consumptions were assessed at baseline in the NHS (1990), the HPFS (1990), the WHI (1994-1998), and the SCHS (1993-1998), respectively.

Data on follow-up BMI was assessed in 2000 in the NHS and HPFS, in the sixth follow-up year in the WHI, and from 2006 to 2010 in the SCHS, respectively.

Long-term BMI changes were calculated based on the changes in BMI from baseline to follow-up year in the four cohorts, respectively.

The general linear model was used to test the *FADS* variant-diets interaction by including a multiplicative interaction term in the models after adjustment for age, source of genotyping data, baseline BMI, smoking, alcohol intake, physical activity, total energy intake, alternate healthy eating index, television watching, sugar sweetened beverage, fried food consumption.

The results were pooled by means of fixed effects meta-analyses (if  $P \geq 0.05$  for heterogeneity between studies).

### Figure 2 Genetic association of *FADS* variant rs174570 with long-term BMI change according to long chain n-3 PUFAs and fish intakes

Pooled-EUR: data from NHS, HPFS, and WHI were pooled.

Pooled Multiethnic: data from NHS, HPFS, WHI and SCHS were pooled.

Data are  $\beta$  coefficients  $\pm$  SE.

Numbers of participants across three categories ( $\leq 1/\text{wk}$ / $1\sim 6/\text{wk}$ / $\geq 1/\text{d}$ ) of fish intake in the NHS, HPFS, WHI, and SCHS are 1618/8465/1239, 977/5108/748, 894/4675/684, and 752/3935/576, respectively.

1  
2  
3 Frequency of fish intake:  $\leq 1$  serving per week, 1~6 servings per week, and 1 serving per day

4  
5 Data on BMI, long chain n-3 PUFAs (food sourced EPA+ DHA and total EPA+ DHA (food and  
6  
7 supplemental use)) and fish consumptions were assessed at baseline in the NHS (1990), the HPFS (1990),  
8  
9 the WHI (1994-1998), and the SCHS (1993-1998), respectively.

10  
11 Data on follow-up BMI was assessed in 2000 in the NHS and HPFS, in the sixth follow-up year in the  
12  
13 WHI, and from 2006 to 2010 in the SCHS, respectively.

14  
15 The general linear model was used to test the genetic association of the *FADS* variant (additive model)  
16  
17 with long-term changes in BMI by frequency of fish intake and tertiles of LC fatty acids after adjustment  
18  
19 for age, source of genotyping data, baseline BMI, smoking, alcohol intake, physical activity, total energy  
20  
21 intake, alternate healthy eating index, television watching, sugar sweetened beverage, fried food  
22  
23 consumption. The results were pooled by means of fixed effects meta-analyses (if  $P \geq 0.05$  for  
24  
25 heterogeneity between studies).  
26  
27  
28  
29

30  
31 **Figure 3 Predicted long-term changes in BMI from long chain n-3 PUFAs intake according to *FADS***  
32  
33 **genotypes**

34  
35 Numbers of T carriers/Non-T carriers in the NHS, HPFS, and WHI are 1698/9625, 1025/5808, and  
36  
37 876/5378, respectively.

38  
39 Black circles for T allele carriers and open circle for non-T-carriers.

40  
41 The general linear model was used to test the associations of long chain n-3 PUFAs intake with long-term  
42  
43 changes in BMI according to *FADS* genotypes after adjustment for age, source of genotyping data,  
44  
45 baseline BMI, smoking, alcohol intake, physical activity, total energy intake, alternate healthy eating index,  
46  
47 television watching, sugar sweetened beverage, fried food consumption.  
48

49  
50 The data on food-sourced EPA+DHA was pooled from the NHS and HPFS cohorts. Data from US cohorts  
51  
52 was pooled by means of fixed effects meta-analyses (if  $P \geq 0.05$  for heterogeneity between studies).  
53  
54  
55  
56  
57  
58  
59

1  
2  
3 **Figure 4 Predicted long-term changes in BMI from fish intake according to *FADS* genotypes**  
4

5 Numbers of T carriers/Non-T carriers in the NHS, HPFS, and WHI are 1698/9625, 1025/5808, and  
6  
7 876/5378, respectively.  
8

9 Black circles for T allele carriers and open circle for non-T-carriers.  
10

11 The general linear model was used to test the associations of and fish intake with long-term changes in  
12  
13 BMI according to *FADS* genotypes after adjustment for age, source of genotyping data, baseline BMI,  
14  
15 smoking, alcohol intake, physical activity, total energy intake, alternate healthy eating index, television  
16  
17 watching, sugar sweetened beverage, fried food consumption.  
18

19 The data on total fish intake was pooled from the NHS, HPFS, and WHI cohorts. Data from US cohorts  
20  
21 was pooled by means of fixed effects meta-analyses (if  $P \geq 0.05$  for heterogeneity between studies).  
22  
23  
24  
25  
26  
27  
28  
29  
30  
31  
32  
33  
34  
35  
36  
37  
38  
39  
40  
41  
42  
43  
44  
45  
46  
47  
48  
49  
50  
51  
52  
53  
54  
55  
56  
57  
58  
59  
60

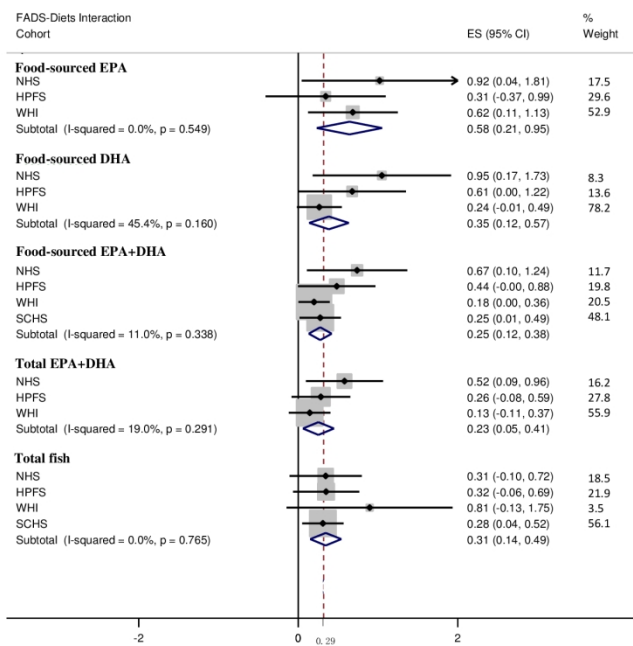

254x190mm (200 x 200 DPI)

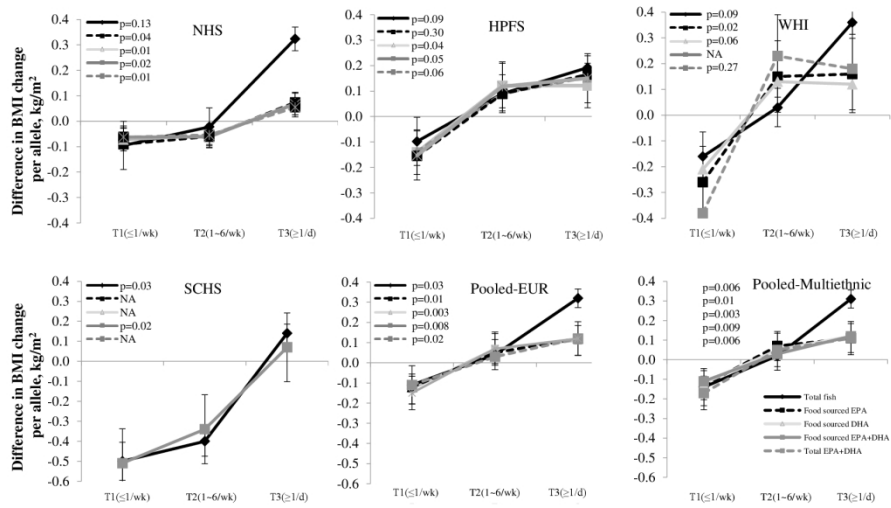

254x190mm (200 x 200 DPI)

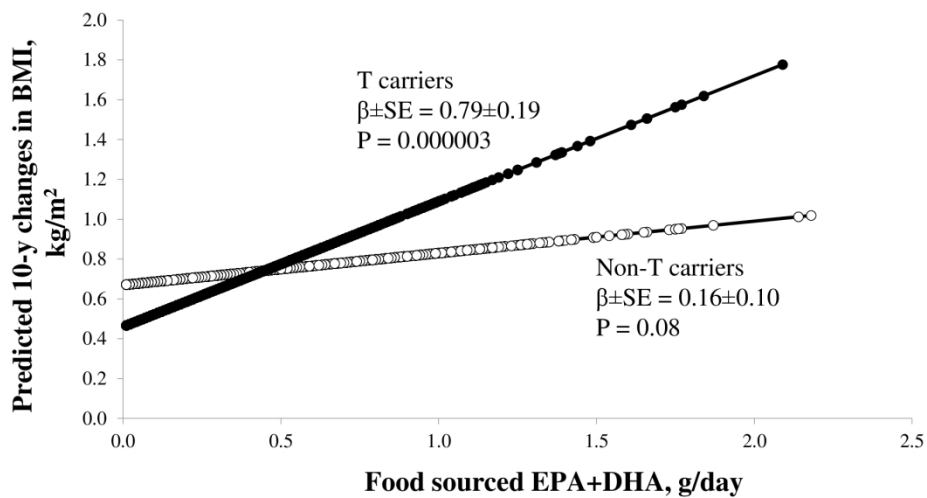

254x190mm (200 x 200 DPI)

1  
2  
3  
4  
5  
6  
7  
8  
9  
10  
11  
12  
13  
14  
15  
16  
17  
18  
19  
20  
21  
22  
23  
24  
25  
26  
27  
28  
29  
30  
31  
32  
33  
34  
35  
36  
37  
38  
39  
40  
41  
42  
43  
44  
45  
46  
47  
48  
49  
50  
51  
52  
53  
54  
55  
56  
57  
58  
59  
60

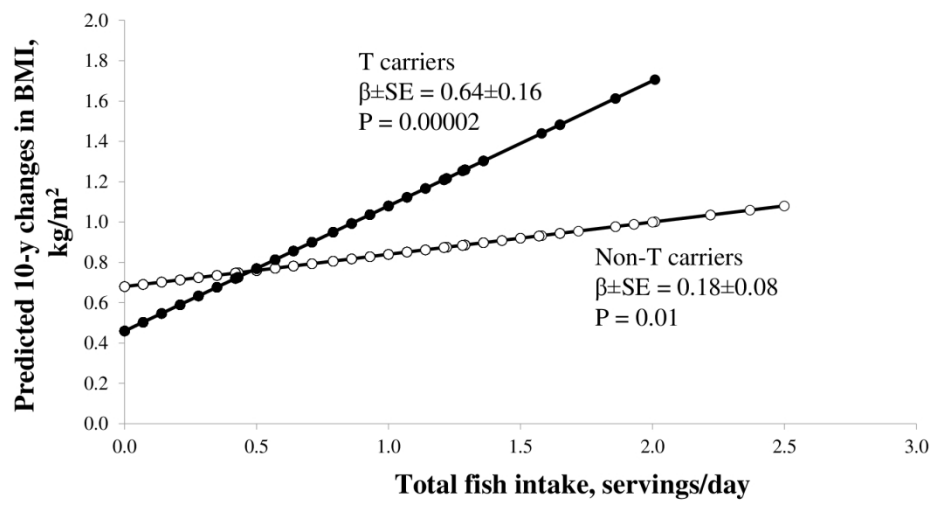

254x190mm (200 x 200 DPI)

**Supplemental table 1. Annotation for the top six SNPs under positive selection in Greenlandic Inuit**

| Position <sup>1</sup> | Reference                 |                      | DAF   |      |      |       |       |      |      | PBS  |
|-----------------------|---------------------------|----------------------|-------|------|------|-------|-------|------|------|------|
|                       | SNP identification number | Alleles <sup>2</sup> | CEU   | CHB  | GI   | NHS   | HPFS  | WHI  | SCHS |      |
|                       |                           |                      |       |      |      |       |       |      |      |      |
| chr11:61627960        | rs74771917                | C/T                  | 0.025 | 0.16 | 0.98 | /     | /     | /    | /    | 2.67 |
| chr11:61631510        | rs3168072                 | A/T                  | 0.017 | 0.18 | 0.98 | /     | /     | /    | /    | 2.64 |
| chr11:61632310        | rs12577276                | A/G                  | 0.017 | 0.18 | 0.98 | /     | /     | /    | /    | 2.64 |
| chr11:61641717        | rs7115739                 | G/T                  | 0.017 | 0.22 | 0.98 | 0.004 | 0.004 | /    | /    | 2.54 |
| chr11:61624414        | rs174602                  | C/T                  | 0.80  | 0.73 | 0.01 | 0.82  | 0.81  | /    | /    | 2.11 |
| chr11:61597212        | rs174570                  | C/T                  | 0.16  | 0.34 | 0.99 | 0.15  | 0.15  | 0.14 | 0.35 | 2.06 |

<sup>1</sup>Positions refer to human genome assembly hg19.

<sup>2</sup>Alleles are coded as ancestral/derived states.

PBS, the population branch statistic; DAF, derived allele frequency; CEU, European ancestry; CHB, an Chinese; GI, Greenlandic Inuit

DAFs for each population (CEU, CHB, and GI) and PBS values are reported, along with the genomic position for each SNP.



**Supplemental table 2 Main effect of the *FADS* variants on adiposity in the four cohorts**

| Outcomes (kg/m <sup>2</sup> ) | <i>FADS</i><br>SNPs | NHS          |       | HPFS         |       | WHI        |      | SCHS       |       | Pooled       |       |
|-------------------------------|---------------------|--------------|-------|--------------|-------|------------|------|------------|-------|--------------|-------|
|                               |                     | Beta ± SE    | P     | Beta ± SE    | P     | Beta ± SE  | P    | Beta ± SE  | P     | Beta ± SE    | P     |
| Baseline BMI                  | rs174570            | 0.03 ± 0.10  | 0.733 | -0.05 ± 0.09 | 0.538 | -0.06±0.17 | 0.72 | 0.24±0.08  | 0.002 | 0.08±0.05    | 0.06  |
| Baseline BMI                  | rs174602            | 0.08 ± 0.10  | 0.418 | -0.05 ± 0.08 | 0.536 | /          | /    | /          | /     | 0.00 ± 0.03  | 0.559 |
| Baseline BMI                  | rs7115739           | 0.25 ± 0.52  | 0.634 | -0.77 ± 0.43 | 0.077 | /          | /    | /          | /     | -0.35 ± 0.14 | 0.196 |
| Long-term BMI change          | rs174570            | -0.05 ± 0.06 | 0.401 | 0.01 ± 0.05  | 0.917 | -0.02±0.09 | 0.77 | -0.02±0.08 | 0.85  | -0.02±0.03   | 0.94  |
| Long-term BMI change          | rs174602            | -0.14 ± 0.06 | 0.009 | 0.04 ± 0.05  | 0.413 | /          | /    | /          | /     | -0.04 ± 0.01 | 0.025 |
| Long-term BMI change          | rs7115739           | 0.45 ± 0.29  | 0.124 | -0.23 ± 0.26 | 0.359 | /          | /    | /          | /     | 0.06 ± 0.08  | 0.183 |

Long-term BMI change: BMI change from 1990 to 2000.

Numbers of T carriers/Non-T carriers in the NHS, HPFS, WHI, and SCHS are 1698/9625, 1025/5808, 876/5378, and 1842/3422, respectively.

Effect size (ES) values are  $\beta$  coefficients for relationship between the *FADS* variant rs174570 (additive model) and adiposity.

The general linear model was used to test the genetic association of *FADS* variants with long-term changes in BMI after adjustment for age, source of genotyping data.

**Supplemental table 3 Genetic association of *FADS* variant with long-term changes in body weight according to long chain n-3 PUFAs and fish intakes**

|                                    | Difference in long-term changes in weight, |            |            | P for interaction |
|------------------------------------|--------------------------------------------|------------|------------|-------------------|
|                                    | kg                                         |            |            |                   |
| <b>Total Fish, serving/day</b>     | ≤1/wk                                      | 1~6/wk     | ≥1/d       |                   |
| NHS                                | -0.69±0.64                                 | -0.13±0.49 | 1.78±1.64  | 0.05              |
| HPFS                               | -0.99±0.85                                 | 0.54±0.53  | 1.52±1.69  | 0.12              |
| WHI                                | -0.22±0.42                                 | 0.16±0.34  | 1.26±1.57  | 0.13              |
| SCHS                               | -0.42±0.29                                 | -0.44±0.28 | 0.20±0.29  | 0.08              |
| Pooled                             | -0.44±0.22                                 | -0.10±0.18 | 0.31±0.28  | 0.01              |
| <b>Food-sourced EPA, g/day</b>     | T1                                         | T2         | T3         |                   |
| NHS                                | -0.77±0.62                                 | -0.25±0.72 | 0.53±0.64  | 0.06              |
| HPFS                               | -1.19±0.82                                 | 0.75±0.73  | 0.72±0.74  | 0.41              |
| WHI                                | -0.19±0.42                                 | 0.24±0.47  | 0.14±0.48  | 0.20              |
| Pooled                             | -0.50±0.32                                 | 0.24±0.34  | 0.37±0.34  | 0.10              |
| <b>Food-sourced DHA, g/day</b>     | T1                                         | T2         | T3         |                   |
| NHS                                | -0.53±0.62                                 | -0.39±0.70 | 0.53±0.65  | 0.01              |
| HPFS                               | -1.06±0.82                                 | 0.49±0.71  | 0.89±0.76  | 0.09              |
| WHI                                | -0.20±0.43                                 | 0.22±0.42  | 0.30±0.50  | 0.26              |
| Pooled                             | -0.43±0.32                                 | 0.15±0.32  | 0.49±0.35  | 0.01              |
| <b>Food-sourced EPA+DHA, g/day</b> | T1                                         | T2         | T3         |                   |
| NHS                                | -0.56±0.63                                 | -0.32±0.68 | 0.49±0.66  | 0.01              |
| HPFS                               | -1.25±0.83                                 | 0.68±0.73  | 0.84±0.74  | 0.09              |
| WHI                                | -0.02±0.43                                 | 0.16±0.44  | 0.14±0.49  | 0.23              |
| SCHS                               | -0.47±0.29                                 | -0.16±0.28 | -0.03±0.29 | 0.10              |

|                             |            |            |           |       |
|-----------------------------|------------|------------|-----------|-------|
| Pooled                      | -0.56±0.25 | -0.09±0.24 | 0.14±0.25 | 0.005 |
| <b>Total EPA+DHA, g/day</b> | <b>T1</b>  | <b>T2</b>  | <b>T3</b> |       |
| NHS                         | -0.58±0.63 | -0.30±0.68 | 0.46±0.66 | 0.02  |
| HPFS                        | -1.20±0.82 | 0.75±0.70  | 0.86±0.77 | 0.18  |
| WHI                         | -0.48±0.47 | 0.64±0.43  | 0.04±0.47 | 0.15  |
| Pooled                      | -0.64±0.34 | 0.45±0.32  | 0.32±0.34 | 0.02  |

Data are  $\beta$  coefficients  $\pm$  SE.

Numbers of T carriers/Non-T carriers in the NHS, HPFS, WHI, and SCHS are 1698/9625, 1025/5808, 876/5378, and 1842/3422, respectively.

Frequency of fish intake:  $\leq 1$  serving per week, 1~6 servings per week, and 1 serving per day

Data on baseline fish and fatty acids consumptions were assessed in 1990 (NHS) and 1990 (HPFS).

Data on body weight were assessed in 1990 and 2000 in NHS and 1990 and 2000 in HPFS.

The general linear model was used to test the genetic association with long-term changes in body weight according to baseline long chain n-3 PUFAs and fish intakes after adjustment for age, source of genotyping data, baseline body weight, smoking, alcohol intake, physical activity, total energy intake, alternate healthy eating index, television watching, sugar sweetened beverage, fried food consumption.

Data from three or four cohorts pooled by means of fixed effects meta-analyses (if  $P \geq 0.05$  for heterogeneity between studies).

**Supplemental table 4 Associations of long chain n-3 PUFAs and fish intakes with long-term changes in body weight according to *FADS* genotypes**

| Cohorts                 |                | Long-term changes in weight, kg |            |            | P for trend |
|-------------------------|----------------|---------------------------------|------------|------------|-------------|
| Total Fish, serving/day |                | ≤1/wk                           | 1~6/wk     | ≥1/d       |             |
| NHS                     | Non T carriers | 4.91±0.34                       | 5.78±0.24  | 7.00±0.79  | 0.008       |
|                         | T carriers     | 4.45±0.61                       | 5.64±0.46  | 9.26±1.44  | 0.001       |
| HPFS                    | Non T carriers | 0.44±0.06                       | 0.52±0.04  | 0.56±0.12  | 0.99        |
|                         | T carriers     | 0.25±0.10                       | 0.53±0.07  | 0.76±0.21  | 0.08        |
| WHI                     | Non T carriers | -0.25±0.23                      | -0.43±0.18 | -0.91±0.93 | 0.50        |
|                         | T carriers     | -0.56±0.37                      | -0.25±0.28 | 1.30±1.71  | 0.13        |
| SCHS                    | Non T carriers | -3.15±0.23                      | -3.50±0.21 | -3.38±0.21 | 0.48        |
|                         | T carriers     | -3.68±0.20                      | -3.41±0.19 | -3.34±0.20 | 0.16        |
| Food-sourced EPA, g/day |                | T1                              | T2         | T3         |             |
| NHS                     | Non T carriers | 4.89±0.33                       | 5.89±0.33  | 5.95±0.33  | 0.24        |
|                         | T carriers     | 4.45±0.59                       | 5.52±0.63  | 6.46±0.61  | 0.34        |
| HPFS                    | Non T carriers | 0.50±0.05                       | 0.54±0.05  | 0.45±0.05  | 0.15        |
|                         | T carriers     | 0.29±0.10                       | 0.54±0.09  | 0.52±0.09  | 0.66        |
| WHI                     | Non T carriers | -0.30±0.25                      | -0.54±0.24 | -0.29±0.24 | 0.42        |
|                         | T carriers     | -0.51±0.39                      | -0.36±0.37 | -0.15±0.38 | 0.14        |
| Food-sourced DHA, g/day |                | T1                              | T2         | T3         |             |
| NHS                     | Non T carriers | 4.78±0.33                       | 5.56±0.34  | 6.32±0.33  | 0.14        |
|                         | T carriers     | 4.50±0.60                       | 5.07±0.63  | 6.77±0.61  | 0.004       |
| HPFS                    | Non T carriers | 0.48±0.05                       | 0.54±0.05  | 0.46±0.06  | 0.40        |
|                         | T carriers     | 0.27±0.10                       | 0.50±0.09  | 0.59±0.09  | 0.15        |
| WHI                     | Non T carriers | -0.41±0.25                      | -0.25±0.24 | -0.45±0.25 | 0.51        |

|      |                                    |            |            |            |            |        |
|------|------------------------------------|------------|------------|------------|------------|--------|
|      |                                    | T carriers | -0.71±0.39 | -0.15±0.37 | -0.16±0.39 | 0.18   |
|      | <b>Food-sourced EPA+DHA, g/day</b> |            | T1         | T2         | T3         |        |
| NHS  | Non T carriers                     |            | 4.69±0.34  | 5.45±0.33  | 6.51±0.33  | 0.02   |
|      | T carriers                         |            | 4.44±0.61  | 5.00±0.61  | 6.92±0.61  | 0.0003 |
| HPFS | Non T carriers                     |            | 0.48±0.05  | 0.53±0.05  | 0.47±0.05  | 0.93   |
|      | T carriers                         |            | 0.26±0.10  | 0.49±0.09  | 0.59±0.09  | 0.08   |
| WHI  | Non T carriers                     |            | -0.44±0.24 | -0.23±0.23 | -0.43±0.24 | 0.47   |
|      | T carriers                         |            | -0.52±0.38 | -0.15±0.37 | -0.33±0.38 | 0.15   |
| SCHS | Non T carriers                     |            | -3.44±0.21 | -3.58±0.22 | -3.05±0.21 | 0.89   |
|      | T carriers                         |            | -3.73±0.19 | -3.57±0.19 | -3.12±0.19 | 0.12   |
|      | <b>Total EPA+DHA, g/day</b>        |            | T1         | T2         | T3         |        |
| NHS  | Non T carriers                     |            | 4.74±0.34  | 5.55±0.32  | 6.36±0.34  | 0.81   |
|      | T carriers                         |            | 4.49±0.61  | 5.16±0.60  | 6.70±0.61  | 0.03   |
| HPFS | Non T carriers                     |            | 0.49±0.05  | 0.53±0.05  | 0.47±0.06  | 0.24   |
|      | T carriers                         |            | 0.26±0.10  | 0.51±0.09  | 0.58±0.09  | 0.33   |
| WHI  | Non T carriers                     |            | 0.32±0.27  | -0.84±0.23 | -0.60±0.28 | 0.19   |
|      | T carriers                         |            | -0.26±0.45 | -0.21±0.37 | -0.02±0.11 | 0.08   |

Data on baseline fish and fatty acids consumptions were assessed in 1990 (NHS) and 1990 (HPFS).

Numbers of T carriers/Non-T carriers in the NHS, HPFS, WHI, and SCHS are 1698/9625, 1025/5808, 876/5378, and 1842/3422, respectively.

Data on body weight were assessed in 1990 and 2000 in NHS and 1990 and 2000 in HPFS.

The general linear model was used to test the associations of long chain n-3 PUFAs and fish intakes with long-term changes in body weight by *FADS* genotypes after adjustment for age, source of genotyping data, baseline body weight, smoking, alcohol intake, physical activity, total energy intake, alternate healthy eating index, television watching, sugar sweetened beverage, fried food consumption.

Data from two cohorts pooled by means of fixed effects meta-analyses (if  $P \geq 0.05$  for heterogeneity between studies) or random effects meta-analyses (if  $P < 0.05$  for heterogeneity between studies).

**Supplemental Table 5 Associations of long chain n-3 PUFAs and fish intakes with long-term changes in BMI according to *FADS* genotypes**

| Diets                   | <i>FADS</i> genotypes | Long chain n-3 PUFAs and fish intakes |           |           | P for trend        | P for interaction* |
|-------------------------|-----------------------|---------------------------------------|-----------|-----------|--------------------|--------------------|
|                         |                       | Categories of diets                   |           |           |                    |                    |
| Food-sourced EPA, g/day |                       | T1                                    | T2        | T3        |                    |                    |
| NHS                     | Non-T carriers        | 0.82±0.06                             | 1.00±0.06 | 1.01±0.06 | 0.24               | 0.05               |
|                         | T carriers            | 0.72±0.10                             | 0.94±0.11 | 1.10±0.11 | 0.29               |                    |
| HPFS                    | Non-T carriers        | 0.48±0.05                             | 0.54±0.05 | 0.47±0.05 | 0.72               | 0.37               |
|                         | T carriers            | 0.23±0.11                             | 0.54±0.10 | 0.52±0.09 | 0.45               |                    |
| WHI                     | Non-T carriers        | 0.10±0.09                             | 0.09±0.09 | 0.45±0.09 | 0.21               | 0.02               |
|                         | T carriers            | -0.08±0.15                            | 0.23±0.15 | 0.46±0.15 | 0.003              |                    |
| Pooled                  | Non-T carriers        | 0.54±0.04                             | 0.63±0.04 | 0.65±0.04 | 0.35               | 0.01               |
|                         | T carriers            | 0.39±0.07                             | 0.63±0.07 | 0.70±0.06 | 0.01               |                    |
| Food-sourced DHA, g/day |                       | T1                                    | T2        | T3        |                    |                    |
| NHS                     | Non-T carriers        | 0.80±0.06                             | 0.94±0.06 | 1.08±0.06 | 0.14               | 0.009              |
|                         | T carriers            | 0.74±0.10                             | 0.83±0.11 | 1.17±0.10 | 0.002              |                    |
| HPFS                    | Non-T carriers        | 0.46±0.05                             | 0.54±0.05 | 0.49±0.05 | 0.99               | 0.05               |
|                         | T carriers            | 0.24±0.10                             | 0.49±0.10 | 0.58±0.09 | 0.05               |                    |
| WHI                     | Non-T carriers        | 0.03±0.09                             | 0.20±0.09 | 0.42±0.09 | 0.03               | 0.06               |
|                         | T carriers            | -0.10±0.15                            | 0.33±0.15 | 0.39±0.15 | 0.006              |                    |
| Pooled                  | Non-T carriers        | 0.51±0.04                             | 0.63±0.04 | 0.68±0.04 | 0.1                | 0.002              |
|                         | T carriers            | 0.38±0.06                             | 0.58±0.07 | 0.77±0.06 | 7×10 <sup>-4</sup> |                    |

Data are means ± SE.

<sup>1</sup>P for interaction was generated from dominant model of *FADS* rs174570 (CC vs CT+TT).

Numbers of T carriers/Non-T carriers in the NHS, HPFS, WHI, and SCHS are 1698/9625, 1025/5808, 876/5378, and 1842/3422, respectively.

Data on BMI, long chain n-3 PUFAs consumptions were assessed at baseline in the NHS (1990), the HPFS (1990), the WHI (1994-1998), and the SCHS (1993-1998), respectively.

Data on follow-up BMI was assessed in 2000 in the NHS and HPFS, in the sixth follow-up year in the

1  
2  
3  
4  
5  
6 WHI, and from 2006 to 2010 in the SCHS, respectively.

7  
8 Long-term BMI changes were calculated based on the changes in BMI from baseline to follow-up year in  
9  
10 the four cohorts, respectively.

11  
12 The general linear model was used to test the associations of long chain n-3 PUFAs and fish intakes with  
13  
14 long-term changes in BMI by *FADS* genotypes after adjustment for age, source of genotyping data,  
15  
16 baseline BMI, smoking, alcohol intake, physical activity, total energy intake, alternate healthy eating index,  
17  
18 television watching, sugar sweetened beverage, fried food consumption.

19  
20 The results were pooled by means of fixed effects meta-analyses (if  $P \geq 0.05$  for heterogeneity between  
21  
22 studies).

23  
24 Registration: [www. clinicaltrials.gov](http://www.clinicaltrials.gov). Registration ID: NCT03348566  
25  
26  
27  
28  
29  
30  
31  
32  
33  
34  
35  
36  
37  
38  
39  
40  
41  
42  
43  
44  
45  
46  
47  
48  
49  
50  
51  
52  
53  
54  
55  
56  
57  
58  
59  
60

1  
2  
3  
4  
5  
6  
7  
8  
9  
10  
11  
12  
13  
14  
15  
16  
17  
18  
19  
20  
21  
22  
23  
24  
25  
26  
27  
28  
29  
30  
31  
32  
33  
34  
35  
36  
37  
38  
39  
40  
41  
42  
43  
44  
45  
46  
47

**TABLE 1. STREGA reporting recommendations, extended from STROBE Statement**

| Item                        | Item number | STROBE Guideline                                                                                                   | Extension for Genetic Association Studies (STREGA)                                                            |
|-----------------------------|-------------|--------------------------------------------------------------------------------------------------------------------|---------------------------------------------------------------------------------------------------------------|
| <b>Title and Abstract</b>   | 1           | (a) Indicate the study's design with a commonly used term in the title or the abstract. <b>(p. 3)</b>              |                                                                                                               |
|                             |             | (b) Provide in the abstract an informative and balanced summary of what was done and what was found. <b>(p. 3)</b> |                                                                                                               |
| <b>Introduction</b>         |             |                                                                                                                    |                                                                                                               |
| <i>Background rationale</i> | 2           | Explain the scientific background and rationale for the investigation being reported. <b>(p. 4)</b>                |                                                                                                               |
| <i>Objectives</i>           | 3           | State specific objectives, including any pre-specified hypotheses.                                                 | <b>State if the study is the first report of a genetic association, a replication effort, or both. (p. 3)</b> |
| <b>Methods</b>              |             |                                                                                                                    |                                                                                                               |
| <i>Study design</i>         | 4           | Present key elements of study design early in the paper. <b>(p. 5)</b>                                             |                                                                                                               |



1  
2  
3  
4  
5  
6  
7  
8  
9  
10  
11  
12  
13  
14  
15  
16  
17  
18  
19  
20  
21  
22  
23  
24  
25  
26  
27  
28  
29  
30  
31  
32  
33  
34  
35  
36  
37  
38  
39  
40  
41  
42  
43  
44  
45  
46  
47

| Item                | Item number | STROBE Guideline                                                                                                                                                                                                                                                                                                                                                                                                                                                                                                                                                                                                                                                                                                                                      | Extension for Genetic Association Studies (STREGA)                                                                                                                                                                              |
|---------------------|-------------|-------------------------------------------------------------------------------------------------------------------------------------------------------------------------------------------------------------------------------------------------------------------------------------------------------------------------------------------------------------------------------------------------------------------------------------------------------------------------------------------------------------------------------------------------------------------------------------------------------------------------------------------------------------------------------------------------------------------------------------------------------|---------------------------------------------------------------------------------------------------------------------------------------------------------------------------------------------------------------------------------|
| <i>Setting</i>      | 5           | Describe the setting, locations and relevant dates, including periods of recruitment, exposure, follow-up, and data collection. <b>(p. 3)</b>                                                                                                                                                                                                                                                                                                                                                                                                                                                                                                                                                                                                         |                                                                                                                                                                                                                                 |
| <i>Participants</i> | 6           | <p>(a) <b>Cohort study</b> – Give the eligibility criteria, and the sources and methods of selection of participants. Describe methods of follow-up. <b>(p. 5)</b></p> <p><b>Case-control study</b> – Give the eligibility criteria, and the sources and methods of case ascertainment and control selection. Give the rationale for the choice of cases and controls.</p> <p><b>Cross-sectional study</b> – Give the eligibility criteria, and the sources and methods of selection of participants.</p> <hr/> <p>(b) <b>Cohort study</b> – For matched studies, give matching criteria and number of exposed and unexposed.</p> <p><b>Case-control study</b> – For matched studies, give matching criteria and the number of controls per case.</p> | <b><i>Give information on the criteria and methods for selection of subsets of participants from a larger study, when relevant. (p. 5)</i></b>                                                                                  |
| <i>Variables</i>    | 7           | <b><i>(a)</i></b> Clearly define all outcomes, exposures, predictors, potential confounders, and effect modifiers. Give diagnostic criteria, if applicable. <b>(p. 5)</b>                                                                                                                                                                                                                                                                                                                                                                                                                                                                                                                                                                             | <b><i>(b) Clearly define genetic exposures (genetic variants) using a widely-used nomenclature system. Identify variables likely to be associated with population stratification (confounding by ethnic origin). (p. 5)</i></b> |

| Item                            | Item number | STROBE Guideline                                                                                                                                                                                        | Extension for Genetic Association Studies (STREGA)                                                                                                                                                                                                                                                                                                                                                                                                                       |
|---------------------------------|-------------|---------------------------------------------------------------------------------------------------------------------------------------------------------------------------------------------------------|--------------------------------------------------------------------------------------------------------------------------------------------------------------------------------------------------------------------------------------------------------------------------------------------------------------------------------------------------------------------------------------------------------------------------------------------------------------------------|
| <i>Data sources measurement</i> | 8*          | <i>(a)</i> For each variable of interest, give sources of data and details of methods of assessment (measurement). Describe comparability of assessment methods if there is more than one group. (p. 5) | <i>(b)</i> Describe laboratory methods, including source and storage of DNA, genotyping methods and platforms (including the allele calling algorithm used, and its version), error rates and call rates. State the laboratory/centre where genotyping was done. Describe comparability of laboratory methods if there is more than one group. Specify whether genotypes were assigned using all of the data from the study simultaneously or in smaller batches. (p. 5) |
| <i>Bias</i>                     | 9           | <i>(a)</i> Describe any efforts to address potential sources of bias. (p. 5 &6)                                                                                                                         | <i>(b)</i> For quantitative outcome variables, specify if any investigation of potential bias resulting from pharmacotherapy was undertaken. If relevant, describe the nature and magnitude of the potential bias, and explain what approach was used to deal                                                                                                                                                                                                            |

1  
2  
3  
4  
5  
6  
7  
8  
9  
10  
11  
12  
13  
14  
15  
16  
17  
18  
19  
20  
21  
22  
23  
24  
25  
26  
27  
28  
29  
30  
31  
32  
33  
34  
35  
36  
37  
38  
39  
40  
41  
42  
43  
44  
45  
46  
47

| Item                          | Item number | STROBE Guideline                                                                                                                                                                                                                                                                                                                                                                                                                                                                                                                                                                                                                         | Extension for Genetic Association Studies (STREGA)                                     |
|-------------------------------|-------------|------------------------------------------------------------------------------------------------------------------------------------------------------------------------------------------------------------------------------------------------------------------------------------------------------------------------------------------------------------------------------------------------------------------------------------------------------------------------------------------------------------------------------------------------------------------------------------------------------------------------------------------|----------------------------------------------------------------------------------------|
|                               |             |                                                                                                                                                                                                                                                                                                                                                                                                                                                                                                                                                                                                                                          | <i>with this. (p. 5 &amp;6)</i>                                                        |
| <i>Study size</i>             | 10          | Explain how the study size was arrived at. <b>(p. 5 &amp;6)</b>                                                                                                                                                                                                                                                                                                                                                                                                                                                                                                                                                                          |                                                                                        |
| <i>Quantitative variables</i> | 11          | Explain how quantitative variables were handled in the analyses. If applicable, describe which groupings were chosen, and why. <b>(p. 7)</b>                                                                                                                                                                                                                                                                                                                                                                                                                                                                                             | <b><i>If applicable, describe how effects of treatment were dealt with. (p. 7)</i></b> |
| <i>Statistical methods</i>    | 12          | <p>(a) Describe all statistical methods, including those used to control for confounding. <b>(p. 7-9)</b></p> <hr/> <p>(b) Describe any methods used to examine subgroups and interactions. <b>(p. 9)</b></p> <hr/> <p>(c) Explain how missing data were addressed. <b>(p. 9)</b></p> <hr/> <p>(d) <b>Cohort study</b> – If applicable, explain how loss to follow-up was addressed. <b>(p. 9)</b></p> <p><b>Case-control study</b> – If applicable, explain how matching of cases and controls was addressed.</p> <p><b>Cross-sectional study</b> – If applicable, describe analytical methods taking account of sampling strategy.</p> | <b><i>State software version used and options (or settings) chosen. (p. 9)</i></b>     |

| Item | Item number | STROBE Guideline                                                                                                                                                                                                 | Extension for Genetic Association Studies (STREGA)                                                                         |
|------|-------------|------------------------------------------------------------------------------------------------------------------------------------------------------------------------------------------------------------------|----------------------------------------------------------------------------------------------------------------------------|
|      |             | (e) Describe any sensitivity analyses. (p. 9)                                                                                                                                                                    |                                                                                                                            |
|      |             | Hardy-Weinberg equilibrium was tested using Chi-square test. (p. 9)                                                                                                                                              | <b>(f) State whether Hardy-Weinberg equilibrium was considered and, if so, how.</b>                                        |
|      |             | We assumed that each SNP in the panel acts independently in an additive manner. We coded the SNPs as following: rs174570 (TT=2, TC=1, CC=0); rs174602 (TT=2, TC=1, CC=0); rs7115739 (TT=2, TG=1, GG=0). (p. 8&9) | <b>(g) Describe any methods used for inferring genotypes or haplotypes.</b>                                                |
|      |             |                                                                                                                                                                                                                  | <b>(h) Describe any methods used to assess or address population stratification. (p. 9)</b>                                |
|      |             |                                                                                                                                                                                                                  | <b>(i) Describe any methods used to address multiple comparisons or to control risk of false positive findings. (p. 9)</b> |
|      |             |                                                                                                                                                                                                                  | <b>(j) Describe any methods used to address and correct for relatedness among subjects(p. 9)</b>                           |

1  
2  
3  
4  
5  
6  
7  
8  
9  
10  
11  
12  
13  
14  
15  
16  
17  
18  
19  
20  
21  
22  
23  
24  
25  
26  
27  
28  
29  
30  
31  
32  
33  
34  
35  
36  
37  
38  
39  
40  
41  
42  
43  
44  
45  
46  
47

| Item                    | Item number | STROBE Guideline                                                                                                                                                                                                                                                                                                                                                                                       | Extension for Genetic Association Studies (STREGA)                                                                                                 |
|-------------------------|-------------|--------------------------------------------------------------------------------------------------------------------------------------------------------------------------------------------------------------------------------------------------------------------------------------------------------------------------------------------------------------------------------------------------------|----------------------------------------------------------------------------------------------------------------------------------------------------|
| <b>Results</b>          |             |                                                                                                                                                                                                                                                                                                                                                                                                        |                                                                                                                                                    |
| <i>Participants</i>     | 13*         | <p>(a) Report the numbers of individuals at each stage of the study – e.g., numbers potentially eligible, examined for eligibility, confirmed eligible, included in the study, completing follow-up, and analysed. <b>(p. 10)</b></p> <hr/> <p>(b) Give reasons for non-participation at each stage. <b>(p. 10)</b></p> <hr/> <p>(c) Consider use of a flow diagram. <b>(p. 10)</b></p>                | <p><b>Report numbers of individuals in whom genotyping was attempted and numbers of individuals in whom genotyping was successful. (p. 10)</b></p> |
| <i>Descriptive data</i> | 14*         | <p>(a) Give characteristics of study participants (e.g., demographic, clinical, social) and information on exposures and potential confounders. <b>(p. 10)</b></p> <hr/> <p>(b) Indicate the number of participants with missing data for each variable of interest. <b>(p. 10)</b></p> <hr/> <p>(c) <b>Cohort study</b> – Summarize follow-up time, e.g. average and total amount. <b>(p. 10)</b></p> | <p><b>Consider giving information by genotype. (p. 10)</b></p>                                                                                     |

| Item                | Item number | STROBE Guideline                                                                                                                                                                                                                | Extension for Genetic Association Studies (STREGA)                       |
|---------------------|-------------|---------------------------------------------------------------------------------------------------------------------------------------------------------------------------------------------------------------------------------|--------------------------------------------------------------------------|
| <i>Outcome data</i> | 15 *        | <b>Cohort study</b> -Report numbers of outcome events or summary measures over time.                                                                                                                                            | <b>Report outcomes (phenotypes) for each genotype category over time</b> |
|                     |             | <b>Case-control study</b> – Report numbers in each exposure category, or summary measures of exposure.                                                                                                                          | <b>Report numbers in each genotype category</b>                          |
|                     |             | <b>Cross-sectional study</b> – Report numbers of outcome events or summary measures.                                                                                                                                            | <b>Report outcomes (phenotypes) for each genotype category</b>           |
| <i>Main results</i> | 16          | (a) Give unadjusted estimates and, if applicable, confounder-adjusted estimates and their precision (e.g., 95% confidence intervals). Make clear which confounders were adjusted for and why they were included. <b>(p. 10)</b> | <b>(d) Report results of any adjustments for multiple</b>                |
|                     |             | (b) Report category boundaries when continuous variables were categorized. <b>(p. 10)</b>                                                                                                                                       |                                                                          |
|                     |             | (c) If relevant, consider translating estimates of relative risk into absolute risk for a meaningful time period. <b>(p. 10)</b>                                                                                                |                                                                          |

1  
2  
3  
4  
5  
6  
7  
8  
9  
10  
11  
12  
13  
14  
15  
16  
17  
18  
19  
20  
21  
22  
23  
24  
25  
26  
27  
28  
29  
30  
31  
32  
33  
34  
35  
36  
37  
38  
39  
40  
41  
42  
43  
44  
45  
46  
47

| Item                  | Item number | STROBE Guideline                                                                                                                                                    | Extension for Genetic Association Studies (STREGA)                                                                                 |
|-----------------------|-------------|---------------------------------------------------------------------------------------------------------------------------------------------------------------------|------------------------------------------------------------------------------------------------------------------------------------|
|                       |             |                                                                                                                                                                     | <i>comparisons. (p. 10)</i>                                                                                                        |
| <i>Other analyses</i> | 17          | (a) Report other analyses done – e.g., analyses of subgroups and interactions, and sensitivity analyses. (p. 10)                                                    | <i>(b) If numerous genetic exposures (genetic variants) were examined, summarize results from all analyses undertaken. (p. 10)</i> |
|                       |             |                                                                                                                                                                     | <i>(c) If detailed results are available elsewhere, state how they can be accessed. (p. 10)</i>                                    |
| <b>Discussion</b>     |             |                                                                                                                                                                     |                                                                                                                                    |
| <i>Key results</i>    | 18          | Summarize key results with reference to study objectives. (p. 11)                                                                                                   |                                                                                                                                    |
| <i>Limitations</i>    | 19          | Discuss limitations of the study, taking into account sources of potential bias or imprecision. Discuss both direction and magnitude of any potential bias. (p. 11) |                                                                                                                                    |

| Item                     | Item number | STROBE Guideline                                                                                                                                                                           | Extension for Genetic Association Studies (STREGA) |
|--------------------------|-------------|--------------------------------------------------------------------------------------------------------------------------------------------------------------------------------------------|----------------------------------------------------|
| <i>Interpretation</i>    | 20          | Give a cautious overall interpretation of results considering objectives, limitations, multiplicity of analyses, results from similar studies, and other relevant evidence. <b>(p. 11)</b> |                                                    |
| <i>Generalizability</i>  | 21          | Discuss the generalizability (external validity) of the study results. <b>(p. 11)</b>                                                                                                      |                                                    |
| <b>Other Information</b> |             |                                                                                                                                                                                            |                                                    |
| <i>Funding</i>           | 22          | Give the source of funding and the role of the funders for the present study and, if applicable, for the original study on which the present article is based. <b>(p. 14)</b>              |                                                    |

STREGA = STrengthening the REporting of Genetic Association studies; STROBE = STrengthening the Reporting of Observational Studies in Epidemiology.

\* Give information separately for cases and controls in case-control studies and, if applicable, for exposed and unexposed groups in cohort and cross-sectional studies.



# BMJ Open

## Fish and marine fatty acids intakes modified the genetic effects of the FADS gene on long-term weight gain: a gene-diet interaction analysis

|                               |                                                                                                                                                                                                                                                                                                                                                                                                                                                                                                                                                                                                                                                                                                                                                                                                                                                                                                                                                                                                                                                                                                                                                                                                                                                                                                                                                                                                                                                                                                                                                                                                                                                                                                                                                                                                                                                                                                                                                                                                                                                                                                                    |
|-------------------------------|--------------------------------------------------------------------------------------------------------------------------------------------------------------------------------------------------------------------------------------------------------------------------------------------------------------------------------------------------------------------------------------------------------------------------------------------------------------------------------------------------------------------------------------------------------------------------------------------------------------------------------------------------------------------------------------------------------------------------------------------------------------------------------------------------------------------------------------------------------------------------------------------------------------------------------------------------------------------------------------------------------------------------------------------------------------------------------------------------------------------------------------------------------------------------------------------------------------------------------------------------------------------------------------------------------------------------------------------------------------------------------------------------------------------------------------------------------------------------------------------------------------------------------------------------------------------------------------------------------------------------------------------------------------------------------------------------------------------------------------------------------------------------------------------------------------------------------------------------------------------------------------------------------------------------------------------------------------------------------------------------------------------------------------------------------------------------------------------------------------------|
| Journal:                      | <i>BMJ Open</i>                                                                                                                                                                                                                                                                                                                                                                                                                                                                                                                                                                                                                                                                                                                                                                                                                                                                                                                                                                                                                                                                                                                                                                                                                                                                                                                                                                                                                                                                                                                                                                                                                                                                                                                                                                                                                                                                                                                                                                                                                                                                                                    |
| Manuscript ID                 | bmjopen-2018-022877.R2                                                                                                                                                                                                                                                                                                                                                                                                                                                                                                                                                                                                                                                                                                                                                                                                                                                                                                                                                                                                                                                                                                                                                                                                                                                                                                                                                                                                                                                                                                                                                                                                                                                                                                                                                                                                                                                                                                                                                                                                                                                                                             |
| Article Type:                 | Research                                                                                                                                                                                                                                                                                                                                                                                                                                                                                                                                                                                                                                                                                                                                                                                                                                                                                                                                                                                                                                                                                                                                                                                                                                                                                                                                                                                                                                                                                                                                                                                                                                                                                                                                                                                                                                                                                                                                                                                                                                                                                                           |
| Date Submitted by the Author: | 13-Mar-2019                                                                                                                                                                                                                                                                                                                                                                                                                                                                                                                                                                                                                                                                                                                                                                                                                                                                                                                                                                                                                                                                                                                                                                                                                                                                                                                                                                                                                                                                                                                                                                                                                                                                                                                                                                                                                                                                                                                                                                                                                                                                                                        |
| Complete List of Authors:     | <p>Huang, Tao; Peking University, Department of Epidemiology and Biostatistics</p> <p>Wang, Tiange ; Shanghai Jiao Tong University, Shanghai Institute of Endocrine and Metabolic Diseases</p> <p>Heianza, Yoriko ; Department of Epidemiology, School of Public Health and Tropical Medicine, Tulane University</p> <p>Wiggs, Janey ; Harvard Medical School, Department of Ophthalmology</p> <p>Sun, Dianjianyi ; School of Public Health and Tropical Medicine, Tulane University</p> <p>Choi, Hyon-Kyoo ; Massachusetts General Hospital - Harvard Medical School Center for Nervous System Repair</p> <p>Chai, Jin Fang ; National University Singapore Yong Loo Lin School of Medicine</p> <p>Sim, Xueling ; National University of Singapore, Epidemiology Domain, Saw Swee Hock School of Public Health</p> <p>Khor, Chiea Chuen ; National University of Singapore, Department of Biochemistry, Yong Loo Lin School of Medicine</p> <p>Friedlander, Yechiel ; Hebrew University, Unit of Epidemiology</p> <p>Chan, Andrew T. ; Massachusetts General Hospital, Division of Gastroenterology</p> <p>Curhan, Gary ; Harvard University T H Chan School of Public Health, Department of Epidemiology</p> <p>Vivo, Immaculata De ; Harvard University T H Chan School of Public Health, Department of Epidemiology</p> <p>van Dam, Rob Martinu. ; National University of Singapore, Department of Epidemiology</p> <p>Heng, Chew Kiat ; National University of Singapore, Department of Paediatrics</p> <p>Fuchs, Charles ; Harvard Medical School, Department of Medicine, Brigham and Women's Hospital</p> <p>Pasquale, Louis R. ; Harvard Medical School, Channing Division of Network Medicine, Department of Medicine</p> <p>Yuan, Jian-min ; University of Pittsburgh, Division of Cancer Control and Population Sciences</p> <p>Hu, Frank B. ; Harvard University T H Chan School of Public Health, Department of Epidemiology</p> <p>Koh, Woon Puay ; National University of Singapore, Department of Epidemiology</p> <p>Qi, Lu; Tulane University, Department of Epidemiology, School of Public</p> |

1  
2  
3  
4  
5  
6  
7  
8  
9  
10  
11  
12  
13  
14  
15  
16  
17  
18  
19  
20  
21  
22  
23  
24  
25  
26  
27  
28  
29  
30  
31  
32  
33  
34  
35  
36  
37  
38  
39  
40  
41  
42  
43  
44  
45  
46  
47  
48  
49  
50  
51  
52  
53  
54  
55  
56  
57  
58  
59  
60

|                                    |                                                                                |
|------------------------------------|--------------------------------------------------------------------------------|
|                                    | Health and Tropical Medicine                                                   |
| <b>Primary Subject Heading</b> :   | Nutrition and metabolism                                                       |
| <b>Secondary Subject Heading</b> : | Diabetes and endocrinology, Epidemiology, Genetics and genomics, Public health |
| <b>Keywords</b> :                  | NUTRITION & DIETETICS, GENETICS, EPIDEMIOLOGY, obesity, gene-diet interaction  |
|                                    |                                                                                |

SCHOLARONE™  
Manuscripts

**Fish and marine fatty acids intakes modified the genetic effects of the *FADS* gene on long-term weight gain: a gene-diet interaction analysis**

Tao Huang<sup>1,2,3\*</sup>, Tiange Wang<sup>4</sup>, Yoriko Heianza<sup>5</sup>, Janey Wiggs<sup>6</sup>, Dianjianyi Sun<sup>5</sup>, Hyon-Kyoo Choi<sup>7</sup>, Jin Fang Chai<sup>8</sup>, Xueling Sim<sup>8</sup>, Chiea Chuen Khor<sup>9,10</sup>, Yechiel Friedlander<sup>11</sup>, Andrew T. Chan<sup>12</sup>, Gary Curhan<sup>13</sup>, Immaculata De Vivo<sup>13</sup>, Rob Martinu. van Dam<sup>8,14</sup>, Chew Kiat Heng<sup>15</sup>, Charles S. Fuchs<sup>16,17</sup>, Louis R. Pasquale<sup>18</sup>, Jian-min Yuan<sup>19,20</sup>, Frank B. Hu<sup>14, 16</sup>, Woon Puay Koh<sup>8,21</sup>, Lu Qi<sup>5, 14, 16\*</sup>

<sup>1</sup>. *Department of Epidemiology and Biostatistics, School of Public Health, Peking University, Beijing 100191, China.*

<sup>2</sup>. *Department of Global Health, School of Public Health, Peking University, China.*

<sup>3</sup>. *Key Laboratory of Molecular Cardiovascular Sciences, Ministry of Education, China.*

<sup>4</sup>. *Shanghai Institute of Endocrine and Metabolic Diseases, Rui Jin Hospital, Shanghai Jiao Tong University School of Medicine, Shanghai, China.*

<sup>5</sup>. *Department of Epidemiology, School of Public Health and Tropical Medicine, Tulane University, 1440 Canal Street, Suite 1724 New Orleans, LA 70112.*

<sup>6</sup>. *Department of Ophthalmology, Harvard Medical School, Massachusetts Eye and Ear Infirmary, Boston, MA 02115, USA.*

<sup>7</sup>. *Department of Rheumatology, Massachusetts General Hospital and Harvard Medical School, Boston, MA 02115, USA.*

<sup>8</sup>. *Epidemiology Domain, Saw Swee Hock School of Public Health, National University of Singapore, Singapore, 117549.*

<sup>9</sup>. *Genome Institute of Singapore, Agency for Science, Technology and Research, Singapore.*

<sup>10</sup>. *Department of Biochemistry, Yong Loo Lin School of Medicine, National University of Singapore, Singapore.*

<sup>11</sup>. *Unit of Epidemiology, Hebrew University-Hadassah Braun School of Public Health, POB 12272, Jerusalem 91120, Israel.*

<sup>12</sup>. *Division of Gastroenterology, Massachusetts General Hospital, Boston, MA 02114, USA.*

<sup>13</sup>. *Department of Epidemiology, Harvard School of Public Health, Boston, MA 02115, USA.*

<sup>14</sup>. *Department of Nutrition, Harvard School of Public Health, Boston, MA 02115, USA.*

<sup>15</sup>. *Department of Paediatrics, National University of Singapore NUHS Tower Block, Level 12, 1E Kent Ridge Road Singapore 119228.*

1  
2  
3 <sup>16</sup>Department of Medicine, Brigham and Women's Hospital and Harvard Medical School Boston, MA 02115, USA.

4  
5 <sup>17</sup>The Center for Gastrointestinal Cancer, Dana-Farber Cancer Institute, Boston, USA.

6  
7 <sup>18</sup>Channing Division of Network Medicine, Department of Medicine, Brigham and Women's Hospital and Harvard  
8  
9 Medical School, Boston, MA 02115, USA.

10  
11 <sup>19</sup>Division of Cancer Control and Population Sciences, University of Pittsburgh Cancer Institute, Pittsburgh, PA,  
12  
13 USA.

14  
15 <sup>20</sup>Department of Epidemiology, University of Pittsburgh Graduate School of Public Health, Pittsburgh, PA, USA.

16  
17 <sup>21</sup>Duke-NUS Medical School, Singapore, Singapore.

18  
19  
20  
21 Registration: [www.clinicaltrials.gov](http://www.clinicaltrials.gov). Registration ID: NCT03348566

22  
23 **Running title:** Genetic adaptation, fish, and weight change

24  
25 **Word count:** 3420

26  
27  
28  
29  
30  
31  
32  
33 **\*Correspondence and requests for reprint:**

34  
35 Dr. Tao Huang. Department of Epidemiology and Biostatistics, School of Public Health, Peking  
36  
37 University, Beijing, China. Email: [huangtao@bjmu.edu.cn](mailto:huangtao@bjmu.edu.cn)

38  
39 Dr. Lu Qi. Department of Epidemiology, School of Public Health and Tropical Medicine, Tulane  
40  
41 University. 1440 Canal Street, Suite 1724, New Orleans, LA 70112

42  
43 Telephone: 504-988-3549;

44  
45 Email: [lqi1@tulane.edu](mailto:lqi1@tulane.edu); [luqi@hsph.harvard.edu](mailto:luqi@hsph.harvard.edu)  
46  
47  
48  
49  
50  
51  
52  
53  
54  
55  
56  
57  
58  
59  
60

## 1 Abstract

2 **Objective:** We tested whether genetic variants near fatty acid desaturases gene (*FADS*) cluster, which  
3 were recently identified to be signatures of adaptation to fish- and n-3 PUFAs-rich diet, interacted with  
4 these dietary factors on change in body mass index (BMI).

5 **Design:** Three *FADS* variants were examined for gene-diet interactions on long-term (~10 years) changes  
6 in BMI and body weight in four prospective cohort studies.

7 **Setting:** Population based study

8 **Participants:** 11,323 women from the Nurses' Health Study (NHS), 6,833 men from the Health  
9 Professionals Follow-up Study (HPFS), and replicated in 6,254 women from the Women's Health  
10 Initiative (WHI), and 5,264 Chinese from the Singapore Chinese Health Study (SCHS).

11 **Main outcomes:** Long-term (~10 years) changes in BMI and body weight

12 **Results:** In the NHS and HPFS cohorts, food-sourced n-3 PUFAs intake showed interactions with the  
13 *FADS* rs174570 on changes of BMI (P for interaction = 0.02 in NHS, 0.05 in HPFS, and 0.007 in  
14 combined). Such interactions were replicated in two independent cohorts WHI and SCHS (P for  
15 interaction = 0.04 in WHI, 0.02 in SCHS, and 0.001 in combined). The genetic associations of the *FADS*  
16 rs174570 with changes in BMI increased across the tertiles of n-3 PUFAs in all the cohorts. Fish intake  
17 also accentuated the genetic associations of the *FADS* rs174570 with long-term changes in BMI (pooled P  
18 for interaction = 0.006). Viewed differently, long chain n-3 PUFAs intake showed stronger association  
19 with long-term changes in BMI among the rs174570 T carriers (beta = 0.79 kg/m<sup>2</sup> per g, P = 3×10<sup>-5</sup>) than  
20 the rs174570 non-T carriers (beta=0.16 kg/m<sup>2</sup> per g, P = 0.08). Similar results were observed for fish  
21 intake.

22 **Conclusions:** Our hypothesis-driven analyses provide replicable evidence that long chain n-3 PUFAs and  
23 fish intakes may interact with the *FADS* variant on long-term weight gain. Further investigation is needed  
24 to confirm our findings in other cohorts.

25

1  
2  
3 27 **Article summary**  
4

5 28 **Strengths and limitations of this study**  
6

- 7 29 ● This is the first study with consistent results from 4 well-established prospective cohorts of different  
8 racial populations such as Caucasians and Singapore Chinese. The consistent results from these  
9 independent cohorts demonstrated the robustness of our findings.  
10  
11 30  
12 31  
13 32 ● Other major strengths include the prospective design, the large sample size, use of long-term change  
14 of BMI, and replication of the results.  
15  
16 33  
17 34 ● Dietary fatty acids, fish, and adiposity measures were self-reported, measurement errors in these  
18 variables are inevitable.  
19  
20 35  
21 36 ● Confounding by other unmeasured or unknown factors might exist, although we have carefully  
22 adjusted for multiple dietary and lifestyle factors.  
23  
24 37  
25 38 ● We acknowledge that the different methods in measuring anthropometric traits, genetic variants and  
26 food intake across cohorts might introduce bias in the present analyses.  
27  
28 39  
29  
30  
31 40  
32  
33  
34  
35  
36  
37  
38  
39  
40  
41  
42  
43  
44  
45  
46  
47  
48  
49  
50  
51  
52  
53  
54  
55  
56  
57  
58  
59  
60

www only

## 42 **Introduction**

43 Diets rich in fish and marine fatty acids, especially long chain n-3 polyunsaturated fatty acids (PUFAs)  
44 has shown beneficial effects on cardiometabolic health<sup>1,2</sup>. However, data from population studies on the  
45 associations between such diet and body weight are inconsistent<sup>3,4</sup>. Emerging evidence suggests genetic  
46 variations may play a role in modifying the relation between dietary factors and body weight<sup>5-7</sup>.

47  
48 A recent study of Inuit identified genetic signatures of adaptation to diets rich in fish and n-3 PUFAs<sup>8</sup>.  
49 The strong signals locate in a cluster of fatty acid desaturases genes (*FADS*) that determine PUFAs levels  
50 <sup>8</sup>. People living in the Arctic region have been found to be genetically prone to develop obesity<sup>9,10</sup> as  
51 survival strength for energy storage<sup>11,12</sup>. Interestingly, the identified *FADS* genetic signatures of diet  
52 adaptation have been also related to adiposity in the Inuit population<sup>8</sup>. Of note, due to long-standing  
53 selection pressure, the identified *FADS* signatures differ in frequency of selective allele across various  
54 populations such as Europeans and Asians<sup>13</sup>, in coincidence with varying levels of fish/marine fatty acids  
55 consumption, and adiposity patterns in these populations<sup>14</sup>. We therefore hypothesized that the genetic  
56 signatures might interact with fish and marine PUFAs intakes on body weight<sup>13</sup>.

57  
58 The present study tested the interactions between n-3 PUFAs and fish intakes and variants in *FADS* gene  
59 cluster, genetic signatures of adaptation to fish- and n-3 PUFAs-rich diet, in relation to long-term changes  
60 in body mass index (BMI) in two US prospective cohorts: the Nurses' Health Study (NHS) and the Health  
61 Professionals Follow-up Study (HPFS). We replicated the findings in two independent, prospective  
62 cohorts the Women's Health Initiative (WHI, US) and the Singapore Chinese Health Study (SCHS).

## 64 **Methods**

### 65 **Discovery cohorts**

#### 66 *The Nurses' Health Study*

1  
2  
3 67 The NHS began in 1976, when 121,700 female registered nurses aged 30-55 y residing in 11 states were  
4  
5 68 recruited to complete a baseline questionnaire about their lifestyle and medical history <sup>15</sup>. The current  
6  
7 69 analysis baseline was set in 1990 for the NHS. We included 11,323 women of European ancestry.  
8  
9 70 Informed consent was obtained from all participants. The DNA extraction methods, quality control  
10  
11 71 measures, SNPs genotyping and imputation when performed have been described in detail elsewhere <sup>16-22</sup>.  
12  
13 72 All participants with baseline long chain n-3 PUFAs and fish consumptions and covariates data, baseline  
14  
15 73 and endpoint BMI data, and genotyping data available based on previous GWASs were included <sup>16-21</sup>. The  
16  
17 74 study protocol was approved by the institutional review boards of Brigham and Women's Hospital and  
18  
19 75 Harvard School of Public Health.  
20  
21  
22 76

### 23 24 77 ***The Health Professionals Follow-up Study***

25  
26 78 The HPFS was initiated in 1986, and was composed of 51,529 male dentists, pharmacists, veterinarians,  
27  
28 79 optometrists, osteopathic physicians, and podiatrists, aged 40-75 y at baseline. The male participants  
29  
30 80 returned a baseline questionnaire about detailed medical history, lifestyle, and usual diet <sup>23</sup>. In the current  
31  
32 81 analysis, we used 1990 as baseline in the HPFS, when the earliest complete dietary data were collected.  
33  
34 82 Our analysis included 6,833 men whose genotype data were available. Informed consent was obtained  
35  
36 83 from all participants. The DNA extraction methods, quality control measures, SNPs genotyping and  
37  
38 84 imputation when performed have been described in detail elsewhere <sup>16-22</sup>. All participants with baseline  
39  
40 85 long chain n-3 PUFAs and fish consumptions and covariates data, baseline and endpoint BMI data, and  
41  
42 86 genotyping data available based on previous GWASs were included <sup>16-21</sup>. The study protocol was also  
43  
44 87 approved by the institutional review boards of Brigham and Women's Hospital and Harvard School of  
45  
46 88 Public Health.  
47  
48  
49 89

### 50 51 90 **Replication cohorts**

#### 52 53 91 ***The Women's Health Initiative (WHI)***



1  
2  
3 92 The Women's Health Initiative (WHI) is a large, multiethnic, 40-center study funded by the National  
4  
5 93 Heart, Lung, and Blood Institute (NHLBI) that focuses on strategies for preventing heart disease, breast  
6  
7 94 and colorectal cancer, and osteoporotic fractures in postmenopausal women. A full description of the WHI  
8  
9 95 study is presented elsewhere<sup>24 25</sup>. For the analyses, all participants with baseline long chain n-3 PUFAs  
10  
11 96 and fish consumption and covariate data, baseline and endpoint BMI data, and genotyping data available  
12  
13 97 based on previous GWASs were included. Finally, we included 6,254 Caucasians women who  
14  
15 98 participated in the WHI clinical trial studies at baseline (1994-1998) and at sixth-year follow-up and for  
16  
17 99 whom DNA was measured. The genomic DNA samples were processed according to standard Affymetrix  
18  
19 100 procedures for processing of the assay. The Affymetrix Human SNP Array 6.0 (Affymetrix®, Inc Santa  
20  
21 101 Clara, CA) was used for genome wide SNP genotyping. Human subjects review committees at each  
22  
23 102 participating institution reviewed and approved the study, and all women gave written informed consent.  
24  
25  
26  
27

103

#### 104 ***The Singapore Chinese Health Study (SCHS) cohort***

105 The design of Singapore Chinese Health Study (SCHS) has been previously described in detail<sup>26</sup>. Briefly,  
106 between 1993 and 1998, 63,257 Chinese men and women between ages of 45 and 74 years living in  
107 Singapore were enrolled into the cohort study<sup>27</sup>. Two follow-up interviews were conducted via telephone  
108 among surviving participants between 1999 and 2004, and again between 2006 and 2010 to update  
109 information on body weight, selected lifestyle factors and medical history. All participants have given  
110 informed consent. The study was approved by the Institutional Review Boards of the National University  
111 of Singapore and the University of Pittsburgh, and the study was carried out in accordance with the  
112 approved guidelines. All participants with baseline long chain n-3 PUFAs and fish consumptions and  
113 covariates data, baseline and endpoint BMI data available were included. Among these participants,  
114 genome-wide genotyping for 2615 incident diabetes cases and 2615 matched controls was performed at  
115 the Genome Institute of the Singapore according to the manufacturer's recommendations using an  
116 Affymetrix ASI (Asian) Axiom array. Genotype calling was performed by the Affymetrix Corporation<sup>28</sup>.

1  
2  
3 117 Genome-wide genotyping for 717 incident myocardial infarction (MI) cases and 644 controls was  
4  
5 118 performed for SCHS samples using the Illumina HumanOmni ZhongHua-8 Bead Chip <sup>29</sup>.

6  
7 119 Among these two case-control studies nested within the cohort, 5,264 subjects with genotyping data had  
8  
9 120 weight reported at both baseline and follow-up 2 interviews, and were included in this analysis.

10  
11 121  
12  
13 **122 Assessment of measures of body mass index**  
14  
15 123 Height and body weight were assessed by questionnaire at baseline, and weight information was requested  
16  
17 124 on follow-up questionnaire in all 4 cohorts. Self-reported weights were highly correlated with directly  
18  
19 125 measured values ( $r=0.97$  in HPFS and NHS) in a validation study <sup>30</sup>. BMI was calculated as body weight  
20  
21 126 (kg)/height (m<sup>2</sup>). We defined long-term changes in BMI as changes in BMI from 1990 to 2000 in the NHS  
22  
23 127 and HPFS cohorts <sup>31</sup>, and from baseline (1993) to sixth year follow-up in the WHI <sup>24,25</sup>, and from baseline  
24  
25 128 (1998) to second follow-up (2004) in the SCHS.

26  
27 129  
28  
29  
30 **130 Assessment of diets and other covariates**  
31  
32 131 Questionnaires were used to collect information on a medical history and diet/lifestyle factors in all 4  
33  
34 132 cohorts. Total fish, n-3 PUFAs, supplemental use of fish oil, alcohol, sugar sweetened beverages, fried  
35  
36 133 food intakes, and other dietary factors at baseline were assessed by validated food frequency  
37  
38 134 questionnaires (FFQ) in the NHS and HPFS <sup>32,33</sup>. A 165-item validated semi-quantitative FFQ was used to  
39  
40 135 collect dietary data and supplemental use of fish oil in the SCHS <sup>27</sup>. Dietary data and supplemental use of  
41  
42 136 fish oil were obtained from a self-administered baseline 122-items validated FFQ in the WHI <sup>34</sup>. Alternate  
43  
44 137 health eating index was previously calculated in the NHS, HPFS <sup>35</sup>, WHI, and SCHS. Physical activity  
45  
46 138 was expressed as metabolic equivalents per week by incorporating the reported time spent on various  
47  
48 139 activities, and the intensity level of each activity. The validity of the self-reported physical activity data  
49  
50 140 has been described previously in the NHS and HPFS <sup>36</sup>. In the WHI, an estimated metabolic equivalent  
51  
52 141 (MET) level for each type of activity was assigned from a compendium of activities <sup>37</sup>. Physical activity  
53  
54  
55  
56  
57  
58  
59  
60

1  
2  
3 142 was assessed using eight continuous categories ranging from never to 31 hours or more in an average  
4  
5 143 week spent doing strenuous sports; vigorous work; and moderate activities in the SCHS <sup>26</sup>.

6  
7 144  
8  
9 145 **The *FADS* variants selection and genotyping**  
10  
11 146 Three of the 6 *FADS* single-nucleotide polymorphisms (SNPs) reported in a recent scan of Inuit genomes  
12  
13 147 for signatures of adaptation <sup>8</sup> were derived from genome-wide scans available in the NHS, HPFS. We  
14  
15 148 assumed that each SNP in the panel acts independently in an additive manner. We coded the SNPs as  
16  
17 149 following: rs174570 (TT=2, TC=1, CC=0); rs174602 (TT=2, TC=1, CC=0); rs7115739 (TT=2, TG=1,  
18  
19 150 GG=0). The *FADS* rs174570 was extracted from GWAS data in the WHI and SCHS cohorts for  
20  
21 151 replication (**Supplemental Table 1**).

### 22 152 23 24 25 26 153 **Patient and Public Involvement**

27  
28 154 Neither patients nor public were involved.  
29  
30  
31 155

### 32 33 156 **Statistical analyses**

34  
35 157 We examined the associations of the *FADS* variants (rs174570, rs174602, rs7115739) with adiposity  
36  
37 158 measures and long-term changes in BMI using multiple linear regression model. Interactions between  
38  
39 159 the *FADS* variants (rs174570, rs174602, rs7115739) and baseline fish intake, and total or food-sourced  
40  
41 160 long chain n-3 PUFAs intakes on long-term changes in BMI were tested by including a multiplicative  
42  
43 161 interaction term in the models in the NHS and HPFS. The significant results for rs174570 were replicated  
44  
45 162 in the WHI and SCHS. Potential confounders considered in multivariable models were age, baseline  
46  
47 163 physical activity, baseline television watching, baseline smoking, baseline alcohol intake, baseline  
48  
49 164 alternate healthy eating index, and baseline total energy intake, sugar sweetened beverages (if available),  
50  
51 165 fried food intake (if available). We further tested the genetic associations with long-term changes in BMI  
52  
53 166 according to long chain n-3 PUFAs and fish intakes, and associations of long chain n-3 PUFAs and fish

1  
2  
3 167 intakes with long-term changes in BMI according to the *FADS* genotypes using multiple linear  
4  
5 168 regression model after adjustment of potential confounders. Linear trend across categories of long chain  
6  
7 169 n-3 PUFAs and fish intakes was quantified with a Wald test for linear trend by assigning the median value  
8  
9 170 to each category and modeling it as a continuous variable. Results across cohorts were pooled with inverse  
10  
11 171 variance weighted meta-analyses by fixed effects models ( $P \geq 0.05$  for heterogeneity between studies)<sup>38</sup>.  
12  
13 172 Hardy-Weinberg equilibrium was tested using Chi-square test. All reported P values are nominal and two  
14  
15 173 sided. Statistical analyses were performed in SAS 9.3 (SAS Institute, Cary, NC, USA).  
16  
17  
18 174

## 175 **Results**

### 176 **Baseline characteristics of all participants in the NHS, HPFS, WHI and SCHS cohorts**

177 **Table 1** shows the baseline characteristics for all participants in the NHS, HPFS, WHI, and SCHS cohorts.  
178 The present study included 11,323 women with genetic data from the NHS cohort, 6,833 men with genetic  
179 data from the HPFS cohort, 6,254 women from the WHI, and 5,264 Chinese from the SCHS. The  
180 distribution of the *FADS* genetic variants in the 4 cohorts is shown in **Supplemental table 1**. Chi-square  
181 test showed that the *FADS* rs174570 is in Hardy-Weinberg equilibrium. We did not observe any  
182 significant genetic association between the *FADS* rs174570 genotype and baseline BMI, and long-term  
183 changes in BMI in the three US cohorts ( $P > 0.05$ ). However, we found that the *FADS* genotype was  
184 significantly associated with baseline BMI in the SCHS ( $P = 0.002$ ) (**Supplemental table 2**).  
185

### 186 **Genetic associations with long-term changes in BMI according to LC n-3 PUFAs/fish intakes**

187 We first tested interactions between the *FADS* genetic variants (rs174570, rs174602, rs7115739) and  
188 intakes of variously sourced long chain n-3 PUFAs and fish in the NHS and HPFS cohorts. We found that  
189 only *FADS* rs174570 (C/T, with T as the common allele in Inuit, but rare allele in Europeans and Asians)  
190 showed significant interaction with LC n-3 PUFAs/fish intakes. Food-sourced n-3 PUFAs  
191 (Eicosapentaenoic acid (EPA) + Docosahexaenoic acid (DHA)) intake consistently magnified the genetic  
192 association with long-term changes in BMI ( $P$  for interaction = 0.02 in NHS, 0.05 in HPFS, and 0.007 in

1  
2  
3 193 combined cohorts) (**Figure 1**). We successfully replicated our results in the WHI cohort (P for interaction  
4  
5 194 = 0.04) and the SCHS cohort (P for interaction = 0.02).  
6

7 195  
8  
9 196 The pooled analyses of the 3 US (Caucasian) samples or all 4 cohorts showed that high intakes of  
10  
11 197 food-sourced n-3 PUFAs intake (P for interaction = 0.008 and 0.009, respectively) significantly  
12  
13 198 accentuated the genetic association of the *FADS* genotypes with long-term changes in BMI (**Figure 2**). No  
14  
15 199 significant heterogeneity in the interaction effect was observed among these cohorts. Differences in  
16  
17 200 long-term changes of BMI per T allele were -0.105 (SE 0.067), 0.027 (SE 0.064), and 0.120 (SE 0.067)  
18  
19 201 kg/m<sup>2</sup> across three tertiles of food-sourced n-3 PUFAs in pooled results from all the 4 cohorts.  
20  
21  
22 202

23  
24 203 Individual food-sourced n-3 PUFAs such as EPA (pooled P for interaction=0.01) and DHA (pooled P for  
25  
26 204 interaction=0.003) showed similar interaction patterns; and the interactions remained significant when  
27  
28 205 supplemented n-3 PUFAs were considered (pooled P for interaction=0.007) (**Figure 2**).  
29  
30 206

31  
32 207 In addition, fish intake showed similar, though less significant, interaction patterns with the *FADS*  
33  
34 208 genotype on long-term changes in BMI in the NHS (P for interaction=0.16), HPFS (P for  
35  
36 209 interaction=0.09), WHI (P for interaction=0.09), SCHS (P for interaction=0.03) and combined results  
37  
38 210 (pooled P for interaction=0.006), and the differences in BMI changes per T allele were -0.096 (SE 0.071),  
39  
40 211 0.041 (SE 0.052), and 0.251 (SE 0.151) kg/m<sup>2</sup> across three categories ( $\leq 1$  serving/week, 1~6  
41  
42 212 servings/week, and  $\geq 1$  serving/day) of fish intake in combined results from all the 4 cohorts.  
43  
44 213

45  
46  
47 214 In addition, we did not observe significant interaction between two other genetic variants in *FADS* cluster  
48  
49 215 (rs174602 and rs7115739) and long chain n-3 PUFAs/fish intakes in relation to long-term changes in BMI  
50  
51 216 in the NHS and HPFS cohorts. Similar interactions for long-term changes in body weight were observed  
52  
53 217 (**Supplemental table 3 & 4**).  
54  
55 218

### 219 **Long chain n-3 PUFAs/fish intakes and long-term changes in BMI according to the *FADS* genotype**

220 We found that individuals who consumed the highest food-sourced n-3 PUFAs (EPA+DHA; T3) had  
221 significantly greater increase of BMI (mean  $\pm$  SE = 0.74 $\pm$ 0.06, kg/m<sup>2</sup>) than did those who consumed the  
222 lowest (T1) (mean  $\pm$  SE = 0.39 $\pm$ 0.07, kg/m<sup>2</sup>) among the T allele carriers, whereas the corresponding BMI  
223 changes were 0.68 $\pm$ 0.03 kg/m<sup>2</sup> and 0.49 $\pm$ 0.03 kg/m<sup>2</sup>, respectively, among the non-T carriers in 4 cohorts  
224 combined (**Table 2 & Supplemental table 5**). Similarly, we observed different associations between fish  
225 intake and BMI changes among the T allele carriers ( $P = 1.5 \times 10^{-6}$ ) and non-carriers ( $P = 0.01$ ) in the  
226 pooled results from these US cohorts. No significant heterogeneity in the interaction effect was observed  
227 among the cohorts.

228  
229 **Figure 3** presents the predicted long-term changes in BMI from food-sourced n-3 PUFAs and fish intake  
230 according to the T carriers and the non-T carriers. Results from the NHS, HPFS and WHI cohorts  
231 consistently showed that the associations of food-sourced n-3 PUFAs and fish intakes with long-term  
232 changes in BMI were stronger among the T carriers than those among the non-T carriers. In the pooled  
233 results, the beta  $\pm$  SE for associations of food-sourced n-3 PUFAs (**Figure 3**) and fish intake (**Figure 4**)  
234 with long-term changes in BMI were 0.79  $\pm$  0.19 kg/m<sup>2</sup> per g ( $P = 0.000003$ ) and 0.64  $\pm$  0.16 kg/m<sup>2</sup> per  
235 serving ( $P = 0.00002$ ) among the T carriers, and whereas the corresponding beta  $\pm$  SE were 0.16  $\pm$  0.10  
236 kg/m<sup>2</sup> per g ( $P = 0.08$ ) and 0.18  $\pm$  0.08 kg/m<sup>2</sup> per serving ( $P = 0.01$ ) among the non-T carriers.

### 238 **Discussion**

239 In 4 large prospective cohorts of the US and Chinese populations, our hypothesis-driven analyses showed  
240 reproducible evidence that long chain n-3 PUFAs and fish intakes accentuated the genetic association of  
241 the *FADS* genotypes with long-term changes in BMI. In addition, our results showed that the *FADS*  
242 rs174570 T allele carriers gained more weight than the non-carriers when they had higher long chain n-3  
243 PUFAs and fish intakes.

1  
2  
3 245 Large prospective cohort studies examining the associations of fish or n-3 PUFAs with body weight  
4  
5 246 and obesity risk have generated conflicting results<sup>3 4</sup>. In addition, several randomized controlled trials  
6  
7 247 (RCTs) supported the protective effects of fish, fish oils, or/and n-3 PUFAs intake on weight-loss<sup>39-41</sup>, but  
8  
9 248 the benefit was not evident in other trials<sup>42-44</sup>. The results from the current study lend support to our  
10  
11 249 hypothesis that the heterogeneous associations between fish or n-3 PUFAs and body weight might be at  
12  
13 250 least partly due to gene-diet interactions.

14 251  
15  
16 252 We found that the genetic associations between the *FADS* rs174570 and long-term BMI change were  
17  
18 253 stronger along with increasing intakes of long chain n-3 PUFAs and fish. Viewed from a different angle,  
19  
20 254 the magnitude of associations of fish and long chain n-3 PUFAs intakes with BMI changes varied among  
21  
22 255 individuals with different genotypes. The *FADS* rs174570 was recently identified from a study of the  
23  
24 256 Inuit, who had high fish/n-3 PUFAs intakes<sup>8</sup>. The high frequency of the T allele in Inuit reflects genetic  
25  
26 257 adaptation to the special fish- and n-3 PUFA rich diet. Interestingly, the identified *FADS* genetic  
27  
28 258 signatures of diet adaptation have been also related to adiposity in this population. Our data indicated that  
29  
30 259 the signature allele (T) was related differently to weight changes (decrease or increase), depending on  
31  
32 260 the levels of fish/n-3 PUFAs intakes. In people with high fish/n-3 PUFAs intakes, carrying the signature  
33  
34 261 allele predisposed to greater weight gain and an increased risk of obesity; while carriers of this allele  
35  
36 262 tended to have less body weight when they are exposed to a diet low in fish and n-3 PUFAs.

37 263  
38  
39 264 We found that individual food-sourced n-3 PUFAs such as EPA and DHA showed similar interaction  
40  
41 265 patterns in relation to long-term changes in BMI; and the interactions also remained significant when  
42  
43 266 supplemented n-3 PUFAs were considered. In addition, our results indicated that the interactions of  
44  
45 267 fish/n-3 PUFAs intakes and the *FADS* genotype were persistent across different racial populations such as  
46  
47 268 Europeans and Asians. Our data suggest that the interactions between n-3 PUFAs and the *FADS* genotype  
48  
49 269 is robust for fatty acids from various sources.

50  
51  
52  
53  
54  
55  
56 270  
57  
58  
59  
60

1  
2  
3 271 The mechanisms underlying the observed gene-diet interactions remain unclear. However, such  
4  
5 272 interactions are biologically plausible. It has long been known that the *FADS* genes such as  
6  
7 273 *FADS1* and *FADS2* encode delta-5 and delta-6 desaturases respectively, which are the important  
8  
9 274 rate-limiting steps in the endogenous formation of long-chain PUFA such as EPA and DHA from linoleic  
10  
11 275 acid (n-6) and  $\alpha$ -linolenic acid (n-3)<sup>45</sup>. The selected allele of *FADS* rs174570 is significantly associated  
12  
13 276 with an increase in the concentration of n-3 fatty acids upstream in the n-3 synthesis pathway<sup>45</sup>. Further, it  
14  
15 277 has been reported that dietary n-3 PUFAs might regulate adipocyte *FADS* expression and function<sup>46</sup>. In  
16  
17 278 addition, storage of energy and body fat is very important for the Arctic population, who are regularly  
18  
19 279 exposed to extremely low temperatures and fishes rich in n-3 PUFAs<sup>11 12</sup>. Under natural selection,  
20  
21 280 these people are genetically prone to high fish intake to keep body fat<sup>9 10</sup>. Therefore, it's not surprising  
22  
23 281 that high fish or n-3 PUFAs intake accentuated genetic susceptibility to obesity among people carrying  
24  
25 282 selective *FADS* signature<sup>47 48</sup>. Our findings support the view that extra n-3 PUFAs may not have much  
26  
27 283 benefit for Europeans with selective *FADS* signature<sup>8 13</sup>.

### 284 **Strengths**

285 Several strengths of this study merit mention. To our knowledge, this is the first study with consistent  
286 results from 4 well-established prospective cohorts of different racial populations such as Caucasians and  
287 Singapore Chinese. The consistent results from these independent cohorts demonstrated the robustness of  
288 our findings. Other major strengths include the prospective design, the large sample size, use of long-term  
289 change of BMI, and replication of the results. Although we prospectively analyzed the data, we cannot  
290 exclude the possibility of reverse causality as this is a study on dietary intake and BMI or weight change  
291 from the baseline, which by default builds in the starting point (i.e. the cross sectional association).

### 292 **Limitations**

293 However, several limitations need to be acknowledged. First, dietary fatty acids, fish, and adiposity  
294 measures were self-reported, measurement errors in these variables are inevitable. Despite this, the food  
295 frequency questionnaires and adiposity measures data have been well validated<sup>27 30 32-34</sup>. Second,



1  
2  
3 296 confounding by other unmeasured or unknown factors might exist, although we have carefully adjusted  
4  
5 297 for multiple dietary and lifestyle factors. Third, a causal relation among long chain n-3 PUFAs and fish  
6  
7 298 consumption, and adiposity cannot be inferred from an observational study. Fourth, all subjects with  
8  
9 299 genetic data were selected in each cohort. The source of genotyping data was diverse (e.g. sub-cohort,  
10  
11 300 case control studies), therefore, subject selection might be a major source of bias. Fifth, we acknowledge  
12  
13 301 that the different methods in measuring anthropometric traits, genetic variants and food intake across  
14  
15 302 cohorts might introduce bias in the present analyses. Finally, the participants included in our study were  
16  
17 303 middle aged and older adults of Caucasians in the US and Chinese in Singapore, and it is unknown  
18  
19 304 whether our findings could be generalized to other demographic or ethnic groups.  
20  
21

## 22 305 **Conclusions**

23  
24 306 In summary, our data provide reproducible evidence from 4 multiethnic cohorts that high long chain n-3  
25  
26 307 PUFAs and fish intakes accentuate the genetic association of the *FADS* with adiposity. These findings  
27  
28 308 emphasize the importance of considering precision nutritional interventions on prevention and treatment  
29  
30 309 of obesity. We acknowledge that these results are hypothesis-generating and need to be confirmed in  
31  
32 310 additional cohorts.  
33  
34  
35 311

36  
37 312 **Contributors:** TH and LQ designed the study and wrote the first draft. TH analyzed the data. FBH  
38  
39 313 provided statistical expertise. TW, YH, DS, CSF, JW, LRP, AT, GC, IDV, HKC, JF, XS, CCK, YF, RM,  
40  
41 314 HCK, JY, KWP, and LQ were involved in data collection. TH and LQ are guarantors. All authors  
42  
43 315 contributed to the interpretation of the results and critical revision of the manuscript for important  
44  
45 316 intellectual content and approved the final version of the manuscript.

46  
47 317 We acknowledge Dr. Gary C. Curhan's contribution to the genetic data.  
48  
49 318

## 51 319 **Funding**

52  
53 320 This study was supported by grants HL126024, HL034594, DK100383, DK091718, HL071981,  
54  
55 321 HL073168, CA87969, CA49449, CA055075, HL34594, HL088521, U01HG004399, DK080140,  
56  
57  
58  
59  
60

1  
2  
3 322 P30DK46200, U01CA137088, U54CA155626, DK58845, DK098311, U01HG004728, EY015473,  
4  
5 323 CA134958, DK70756 and DK46200 from the National Institutes of Health, with additional support for  
6  
7 324 genotyping from Merck Research Laboratories, North Wales, PA. LQ is a recipient of the American Heart  
8  
9 325 Association Scientist Development Award (0730094N). LRP is supported by the Arthur Ashley Williams  
10  
11 326 Foundation and a Harvard Ophthalmology Scholar Award (Harvard Medical School) from the Harvard  
12  
13 327 Glaucoma Center of Excellence. ATC is a Damon Runyon Cancer Foundation Clinical Investigator. The  
14  
15 328 SCHS study is supported by the National Institutes of Health, USA (NCI R01 CA144034, UM1  
16  
17 329 CA182876, R01 DK080720), the Singapore National Medical Research Council (NMRC 1270/2010), the  
18  
19 330 HUI-CREATE Programme of the National Research Foundation, Singapore (Project Number 370062002)  
20  
21  
22 331 and Biomedical Research Council, Singapore. The funding sources had no role in the design or conduct of  
23  
24 332 the study; collection, management, analysis, and interpretation of the data; or preparation, review, or  
25  
26 333 approval of the manuscript.

27  
28 334  
29  
30 335 **Declaration of interests:** All authors have no conflict of interest to declare. No support from any  
31  
32 336 organization for the submitted work; no financial relationships with any organizations that might have an  
33  
34 337 interest in the submitted work in the previous three years, no other relationship or activity that could  
35  
36 338 appear to have influenced the submitted work.

37  
38 339  
39  
40 340  
41  
42  
43 341 **Data sharing**  
44  
45 342 Data are available in Harvard school of public health, NHS and HPFS cohorts. All data relevant to the  
46  
47 343 study are included in the article or uploaded as supplementary information.  
48  
49  
50  
51  
52  
53  
54  
55  
56  
57  
58  
59

## References

1. Del Gobbo LC, Imamura F, Aslibekyan S, Marklund M, Virtanen JK, Wennberg M, et al. omega-3 Polyunsaturated Fatty Acid Biomarkers and Coronary Heart Disease: Pooling Project of 19 Cohort Studies. *JAMA internal medicine* 2016;176(8):1155-66.
2. Hu FB, Bronner L, Willett WC, Stampfer MJ, Rexrode KM, Albert CM, et al. Fish and omega-3 fatty acid intake and risk of coronary heart disease in women. *Jama* 2002;287(14):1815-21.
3. He K, Rimm EB, Merchant A, Rosner BA, Stampfer MJ, Willett WC, et al. Fish consumption and risk of stroke in men. *Jama* 2002;288(24):3130-6.
4. Iso H, Rexrode KM, Stampfer MJ, Manson JE, Colditz GA, Speizer FE, et al. Intake of fish and omega-3 fatty acids and risk of stroke in women. *Jama* 2001;285(3):304-12.
5. Qi L, Cho YA. Gene-environment interaction and obesity. *Nutrition reviews* 2008;66(12):684-94.
6. Qi Q, Chu AY, Kang JH, Huang J, Rose LM, Jensen MK, et al. Fried food consumption, genetic risk, and body mass index: gene-diet interaction analysis in three US cohort studies. *BMJ* 2014;348:g1610.
7. Qi Q, Chu AY, Kang JH, Jensen MK, Curhan GC, Pasquale LR, et al. Sugar-sweetened beverages and genetic risk of obesity. *The New England journal of medicine* 2012;367(15):1387-96.
8. Fumagalli M, Moltke I, Grarup N, Racimo F, Bjerregaard P, Jorgensen ME, et al. Greenlandic Inuit show genetic signatures of diet and climate adaptation. *Science* 2015;349(6254):1343-7.
9. Hegele RA, Anderson C, Young TK, Connelly PW. G-protein beta3 subunit gene splice variant and body fat distribution in Nunavut Inuit. *Genome research* 1999;9(10):972-7.
10. Hegele RA, Huff MW, Young TK. Common genomic variation in LMNA modulates indexes of obesity in Inuit. *The Journal of clinical endocrinology and metabolism* 2001;86(6):2747-51.
11. Jorgensen ME, Bjeregaard P, Borch-Johnsen K. Diabetes and impaired glucose tolerance among the inuit population of Greenland. *Diabetes Care* 2002;25(10):1766-71.
12. Jorgensen ME, Glumer C, Bjerregaard P, Gyntelberg F, Jorgensen T, Borch-Johnsen K. Obesity and central fat pattern among Greenland Inuit and a general population of Denmark (Inter99): relationship to metabolic risk factors. *International journal of obesity and related metabolic disorders : journal of the International Association for the Study of Obesity* 2003;27(12):1507-15.
13. Tishkoff S. GENETICS. Strength in small numbers. *Science* 2015;349(6254):1282-3.
14. Dewailly E, Blanchet C, Lemieux S, Sauve L, Gingras S, Ayotte P, et al. n-3 Fatty acids and cardiovascular disease risk factors among the Inuit of Nunavik. *The American journal of clinical nutrition* 2001;74(4):464-73.
15. Colditz GA, Manson JE, Hankinson SE. The Nurses' Health Study: 20-year contribution to the understanding of health among women. *Journal of women's health / the official publication of the Society for the Advancement of Women's Health Research* 1997;6(1):49-62.
16. Cornelis MC, Monda KL, Yu K, Paynter N, Azzato EM, Bennett SN, et al. Genome-wide meta-analysis identifies regions on 7p21 (AHR) and 15q24 (CYP1A2) as determinants of habitual caffeine consumption. *PLoS genetics* 2011;7(4):e1002033.
17. Jensen MK, Pers TH, Dworzynski P, Gorman CJ, Brunak S, Rimm EB. Protein interaction-based genome-wide analysis of incident coronary heart disease. *Circulation. Cardiovascular genetics* 2011;4(5):549-56.
18. Wiggs JL, Kang JH, Yaspan BL, Mirel DB, Laurie C, Crenshaw A, et al. Common variants near CAV1 and CAV2 are associated with primary open-angle glaucoma in Caucasians from the USA. *Human molecular genetics* 2011;20(23):4707-13.
19. Hunter DJ, Kraft P, Jacobs KB, Cox DG, Yeager M, Hankinson SE, et al. A genome-wide association study identifies alleles in FGFR2 associated with risk of sporadic postmenopausal breast cancer. *Nature genetics* 2007;39(7):870-4.
20. Qi L, Cornelis MC, Kraft P, Stanya KJ, Linda Kao WH, Pankow JS, et al. Genetic variants at 2q24 are associated with susceptibility to type 2 diabetes. *Hum Mol Genet* 2010;19(13):2706-15.
21. Kottgen A, Albrecht E, Teumer A, Vitart V, Krumsiek J, Hundertmark C, et al. Genome-wide association analyses identify 18 new loci associated with serum urate concentrations. *Nature genetics* 2013;45(2):145-54.
22. Peters U, Jiao S, Schumacher FR, Hutter CM, Aragaki AK, Baron JA, et al. Identification of Genetic Susceptibility Loci for Colorectal Tumors in a Genome-Wide Meta-analysis. *Gastroenterology* 2013;144(4):799-807 e24.
23. Rimm EB, Giovannucci EL, Willett WC, Colditz GA, Ascherio A, Rosner B, et al. Prospective study of alcohol consumption and risk of coronary disease in men. *Lancet* 1991;338(8765):464-8.

24. Anderson GL, Manson J, Wallace R, Lund B, Hall D, Davis S, et al. Implementation of the Women's Health Initiative study design. *Annals of epidemiology* 2003;13(9 Suppl):S5-17.
25. Design of the Women's Health Initiative clinical trial and observational study. The Women's Health Initiative Study Group. *Controlled clinical trials* 1998;19(1):61-109.
26. Yuan JM, Stram DO, Arakawa K, Lee HP, Yu MC. Dietary cryptoxanthin and reduced risk of lung cancer: the Singapore Chinese Health Study. *Cancer epidemiology, biomarkers & prevention : a publication of the American Association for Cancer Research, cosponsored by the American Society of Preventive Oncology* 2003;12(9):890-8.
27. Hankin JH, Stram DO, Arakawa K, Park S, Low SH, Lee HP, et al. Singapore Chinese Health Study: development, validation, and calibration of the quantitative food frequency questionnaire. *Nutrition and cancer* 2001;39(2):187-95.
28. Chen Z, Pereira MA, Seielstad M, Koh WP, Tai ES, Teo YY, et al. Joint effects of known type 2 diabetes susceptibility loci in genome-wide association study of Singapore Chinese: the Singapore Chinese health study. *PloS one* 2014;9(2):e87762.
29. Dorajoo R, Sun Y, Han Y, Ke T, Burger A, Chang X, et al. A genome-wide association study of n-3 and n-6 plasma fatty acids in a Singaporean Chinese population. *Genes & nutrition* 2015;10(6):53.
30. Rimm EB, Stampfer MJ, Colditz GA, Chute CG, Litin LB, Willett WC. Validity of self-reported waist and hip circumferences in men and women. *Epidemiology* 1990;1(6):466-73.
31. Huang T, Zheng Y, Qi Q, Xu M, Ley SH, Li Y, et al. DNA methylation variants at HIF3A locus, B vitamins intake, and long-term weight change: gene-diet interactions in two US cohorts. *Diabetes* 2015.
32. Willett WC, Sampson L, Stampfer MJ, Rosner B, Bain C, Witschi J, et al. Reproducibility and validity of a semiquantitative food frequency questionnaire. *Am J Epidemiol* 1985;122(1):51-65.
33. Rimm EB, Giovannucci EL, Stampfer MJ, Colditz GA, Litin LB, Willett WC. Reproducibility and validity of an expanded self-administered semiquantitative food frequency questionnaire among male health professionals. *Am J Epidemiol* 1992;135(10):1114-26; discussion 27-36.
34. Patterson RE, Kristal AR, Tinker LF, Carter RA, Bolton MP, Agurs-Collins T. Measurement characteristics of the Women's Health Initiative food frequency questionnaire. *Annals of epidemiology* 1999;9(3):178-87.
35. Chiuve SE, Fung TT, Rimm EB, Hu FB, McCullough ML, Wang M, et al. Alternative dietary indices both strongly predict risk of chronic disease. *The Journal of nutrition* 2012;142(6):1009-18.
36. Wolf AM, Hunter DJ, Colditz GA, Manson JE, Stampfer MJ, Corsano KA, et al. Reproducibility and validity of a self-administered physical activity questionnaire. *Int J Epidemiol* 1994;23(5):991-9.
37. Langer RD, White E, Lewis CE, Kotchen JM, Hendrix SL, Trevisan M. The Women's Health Initiative Observational Study: baseline characteristics of participants and reliability of baseline measures. *Annals of epidemiology* 2003;13(9 Suppl):S107-21.
38. Higgins JP, Thompson SG. Quantifying heterogeneity in a meta-analysis. *Statistics in medicine* 2002;21(11):1539-58.
39. Kabir M, Skurnik G, Naour N, Pechtner V, Meugnier E, Rome S, et al. Treatment for 2 mo with n 3 polyunsaturated fatty acids reduces adiposity and some atherogenic factors but does not improve insulin sensitivity in women with type 2 diabetes: a randomized controlled study. *The American journal of clinical nutrition* 2007;86(6):1670-9.
40. Munro IA, Garg ML. Prior supplementation with long chain omega-3 polyunsaturated fatty acids promotes weight loss in obese adults: a double-blinded randomised controlled trial. *Food & function* 2013;4(4):650-8.
41. Thorsdottir I, Tomasson H, Gunnarsdottir I, Gisladdottir E, Kiely M, Parra MD, et al. Randomized trial of weight-loss-diets for young adults varying in fish and fish oil content. *Int J Obes (Lond)* 2007;31(10):1560-6.
42. Munro IA, Garg ML. Dietary supplementation with n-3 PUFA does not promote weight loss when combined with a very-low-energy diet. *The British journal of nutrition* 2012;108(8):1466-74.
43. Crochemore IC, Souza AF, de Souza AC, Rosado EL. omega-3 polyunsaturated fatty acid supplementation does not influence body composition, insulin resistance, and lipemia in women with type 2 diabetes and obesity. *Nutrition in clinical practice : official publication of the American Society for Parenteral and Enteral Nutrition* 2012;27(4):553-60.
44. Bender N, Portmann M, Heg Z, Hofmann K, Zwahlen M, Egger M. Fish or n3-PUFA intake and body composition: a systematic review and meta-analysis. *Obesity reviews : an official journal of the International Association for the Study of Obesity* 2014;15(8):657-65.
45. Ameer A, Enroth S, Johansson A, Zaboli G, Igl W, Johansson AC, et al. Genetic adaptation of fatty-acid metabolism: a human-specific haplotype increasing the biosynthesis of long-chain omega-3 and omega-6

- 1  
2  
3 fatty acids. *Am J Hum Genet* 2012;90(5):809-20.
- 4 46. Ralston JC, Matravadia S, Gaudio N, Holloway GP, Mutch DM. Polyunsaturated fatty acid regulation of  
5 adipocyte FADS1 and FADS2 expression and function. *Obesity (Silver Spring)* 2015;23(4):725-8.
- 6 47. Smith GI, Julliand S, Reeds DN, Sinacore DR, Klein S, Mittendorfer B. Fish oil-derived n-3 PUFA therapy  
7 increases muscle mass and function in healthy older adults. *The American journal of clinical nutrition*  
8 2015;102(1):115-22.
- 9 48. Jourdan C, Kloiber S, Nieters A, Seiler H, Himmerich H, Kohli MA, et al. Gene-PUFA interactions and obesity  
10 risk. *The British journal of nutrition* 2011;106(8):1263-72.
- 11  
12  
13  
14  
15  
16  
17  
18  
19  
20  
21  
22  
23  
24  
25  
26  
27  
28  
29  
30  
31  
32  
33  
34  
35  
36  
37  
38  
39  
40  
41  
42  
43  
44  
45  
46  
47  
48  
49  
50  
51  
52  
53  
54  
55  
56  
57  
58  
59  
60

**Table 1 Baseline characteristics of all participants in the NHS, HPFS, WHI, and SCHS cohorts.**

|                                                | NHS <sup>1</sup> | HPFS          | WHI          | SCHS                     |
|------------------------------------------------|------------------|---------------|--------------|--------------------------|
|                                                | n=11,323         | n=6,833       | n=6,254      | n=5,264                  |
| Age (year)                                     | 57 ± 9           | 57 ± 11       | 68 ± 5       | 56 ± 7                   |
| Female (%)                                     | 100              | 0             | 100          | 58.7                     |
| Body weight (kg)                               | 70.1 ± 14.9      | 82.8 ± 12.5   | 73.7 ± 15.0  | 60.3 ± 9.8               |
| Body mass index (kg/m <sup>2</sup> )           | 26.2 ± 5.1       | 25.9 ± 3.3    | 28.3 ± 5.5   | 23.4 ± 3.3               |
| Alcohol consumption (g/day)                    | 5.14 ± 9.23      | 10.97 ± 15.05 | 6.00 ± 11.96 | 1.97 ± 8.02              |
| Physical activity (MET-h/week)                 | 19.3 ± 22.1      | 36.9 ± 39.5   | 11.6 ± 13.1  | 0.5 ± 1.0 <sup>2</sup>   |
| Television watching (h/week)                   | 17.5 ± 14.8      | 10.5 ± 8.2    | /            | 2.2 ± 0.8                |
| Current smokers (n, (%))                       | 1557(13.8)       | 493(7.3)      | 407(15.0)    | 1364(20.0)               |
| Total energy intake (kcal/day)                 | 1766 ± 502       | 1949 ± 578    | 1602 ± 654   | 1606 ± 573               |
| Alternative health eating index score          | 53.4 ± 10.8      | 53.8 ± 11.4   | 53.5 ± 10.6  | 55.8 ± 8.2               |
| Sugar sweetened beverage intake (servings/day) | 0.13 ± 0.39      | 0.23 ± 0.48   | 0.39 ± 0.82  | 0.69 ± 2.40 <sup>3</sup> |
| Total fried food (servings/day)                | 0.12 ± 0.20      | 0.22 ± 0.28   | /            | /                        |
| Fish intake (servings/day)                     | 0.31 ± 0.29      | 0.33 ± 0.30   | 0.23 ± 0.20  | 0.16 ± 0.07              |
| Food-sourced EPA (g/day)                       | 0.08 ± 0.14      | 0.12 ± 0.20   | 0.04 ± 0.04  | /                        |
| Food-sourced DHA (g/day)                       | 0.17 ± 0.14      | 0.22 ± 0.19   | 0.07 ± 0.07  | /                        |
| Food-sourced EPA+DHA (g/day)                   | 0.23 ± 0.19      | 0.31 ± 0.25   | 0.11 ± 0.10  | 0.33 ± 0.20              |
| Total EPA+DHA (g/day)                          | 0.26 ± 0.27      | 0.35 ± 0.37   | 0.38 ± 0.48  | /                        |

<sup>1</sup>Plus-minus values are means ± SD. <sup>2</sup>Hours per week of moderate activity in the SCHS. <sup>3</sup>Glasses per week of soda intake in the SCHS.

EPA: 20:5n-3; DHA: 22:6n-3; MET denotes metabolic equivalents. Total EPA+DHA includes food-sourced and supplemental EPA+DHA.

Data on BMI, long chain n-3 PUFAs and fish consumptions were assessed at baseline in the NHS (1990), the HPFS (1990), the WHI (1994-1998), and the SCHS (1993-1998), respectively. Television watching assessed in 1992 for NHS and in 1990 for HPFS.

**Table 2 Associations of long chain n-3 PUFAs and fish intakes with long-term changes in BMI according to *FADS* genotypes**

| <i>FADS</i> genotypes              |                | Three categories of long chain n-3 PUFAs and fish intakes |            |            | P for trend          | P for interaction* |
|------------------------------------|----------------|-----------------------------------------------------------|------------|------------|----------------------|--------------------|
|                                    |                | ≤1/wk                                                     | 1~6/wk     | ≥1/d       |                      |                    |
| <b>Total fish, serving/day</b>     |                |                                                           |            |            |                      |                    |
| NHS                                | Non-T carriers | 0.82±0.06                                                 | 0.98±0.04  | 1.15±0.13  | 0.006                | 0.03               |
|                                    | T carriers     | 0.73±0.11                                                 | 0.95±0.08  | 1.55±0.25  | 0.0007               |                    |
| HPFS                               | Non-T carriers | 0.43±0.05                                                 | 0.52±0.04  | 0.59±0.12  | 0.73                 | 0.03               |
|                                    | T carriers     | 0.21±0.11                                                 | 0.52±0.07  | 0.79±0.22  | 0.02                 |                    |
| WHI                                | Non-T carriers | 0.11±0.08                                                 | 0.28±0.06  | 0.28±0.34  | 0.04                 | 0.09               |
|                                    | T carriers     | 0.02±0.15                                                 | 0.29±0.11  | 0.94±0.67  | 0.01                 |                    |
| SCHS                               | Non-T carriers | -3.08±0.19                                                | -3.00±0.17 | -3.35±0.18 | 0.32                 | 0.01               |
|                                    | T carriers     | -3.61±0.17                                                | -3.10±0.15 | -3.25±0.17 | 0.13                 |                    |
| Pooled <sup>1</sup>                | Non-T carriers | 0.50±0.03                                                 | 0.67±0.03  | 0.81±0.08  | 0.01                 | 0.0007             |
|                                    | T carriers     | 0.38±0.07                                                 | 0.63±0.05  | 1.11±0.16  | 2×10 <sup>-4</sup>   |                    |
| <b>Food-sourced EPA+DHA, g/day</b> |                | Tertile1                                                  | Tertile2   | Tertile3   |                      |                    |
| NHS                                | Non-T carriers | 0.79±0.06                                                 | 0.92±0.05  | 1.11±0.06  | 0.01                 | 0.005              |
|                                    | T carriers     | 0.71±0.10                                                 | 0.84±0.11  | 1.19±0.11  | 0.0001               |                    |
| HPFS                               | Non-T carriers | 0.46±0.05                                                 | 0.53±0.05  | 0.49±0.05  | 0.79                 | 0.02               |
|                                    | T carriers     | 0.23±0.11                                                 | 0.48±0.10  | 0.58±0.09  | 0.02                 |                    |
| WHI                                | Non-T carriers | 0.02±0.08                                                 | 0.21±0.08  | 0.41±0.08  | 0.06                 | 0.04               |
|                                    | T carriers     | -0.03±0.15                                                | 0.29±0.14  | 0.35±0.15  | 0.004                |                    |
| SCHS                               | Non-T carriers | -3.32±0.17                                                | -3.15±0.18 | -2.99±0.17 | 0.16                 | 0.035              |
|                                    | T carriers     | -3.55±0.16                                                | -3.34±0.16 | -3.05±0.16 | 0.02                 |                    |
| Pooled <sup>1</sup>                | Non-T carriers | 0.49±0.03                                                 | 0.64±0.03  | 0.68±0.03  | 0.01                 | 0.0003             |
|                                    | T carriers     | 0.39±0.07                                                 | 0.57±0.06  | 0.74±0.06  | 1.5×10 <sup>-6</sup> |                    |
| <b>Total EPA+DHA, g/day</b>        |                | Tertile1                                                  | Tertile2   | Tertile3   |                      |                    |

1  
2  
3  
4  
5  
6  
7  
8  
9  
10  
11  
12  
13  
14  
15  
16  
17  
18  
19  
20  
21  
22  
23  
24  
25  
26  
27  
28  
29  
30  
31  
32  
33  
34  
35  
36  
37  
38  
39  
40  
41  
42  
43  
44  
45  
46  
47  
48  
49  
50  
51  
52  
53  
54  
55  
56  
57  
58  
59  
60

|                     |                |           |           |           |      |       |
|---------------------|----------------|-----------|-----------|-----------|------|-------|
| NHS                 | Non-T carriers | 0.79±0.06 | 0.94±0.05 | 1.08±0.06 | 0.8  | 0.01  |
|                     | T carriers     | 0.72±0.11 | 0.87±0.10 | 1.16±0.11 | 0.02 |       |
| HPFS                | Non-T carriers | 0.47±0.05 | 0.53±0.05 | 0.49±0.05 | 0.88 | 0.13  |
|                     | T carriers     | 0.23±0.10 | 0.50±0.09 | 0.57±0.10 | 0.16 |       |
| WHI                 | Non-T carriers | 0.39±0.10 | 0.04±0.08 | 0.23±0.10 | 0.42 | 0.27  |
|                     | T carriers     | 0.04±0.18 | 0.28±0.15 | 0.28±0.16 | 0.84 |       |
| Pooled <sup>1</sup> | Non-T carriers | 0.57±0.04 | 0.62±0.03 | 0.67±0.04 | 0.65 | 0.005 |
|                     | T carriers     | 0.39±0.07 | 0.60±0.06 | 0.74±0.07 | 0.01 |       |

---

Data are means ± SE for long term changes in BMI.

Total EPA+DHA include food-sourced and supplemental EPA+DHA.

<sup>1</sup>P for interaction was generated from dominant model of *FADS* rs174570 (CC vs CT+TT).

Numbers of T carriers/Non-T carriers in the NHS, HPFS, WHI, and SCHS are 1698/9625, 1025/5808, 876/5378, and 1842/3422, respectively.

Data on BMI, long chain n-3 PUFAs and fish consumptions were assessed at baseline in the NHS (1990), the HPFS (1990), the WHI (1994-1998), and the SCHS (1993-1998), respectively.

Data on follow-up BMI was assessed in 2000 in the NHS and HPFS, in the sixth follow-up year in the WHI, and from 2006 to 2010 in the SCHS, respectively.

Long-term BMI changes were calculated based on the changes in BMI from baseline to follow-up year in the four cohorts, respectively.

The multiple linear regression model was used to test the associations of long chain n-3 PUFAs and fish intakes with long-term changes in BMI by *FADS* genotypes after adjustment for age, source of genotyping data, baseline BMI, smoking, alcohol intake, physical activity, total energy intake, alternate healthy eating index, television watching, sugar sweetened beverage, fried food consumption.

The results were pooled by means of fixed effects meta-analyses ( $P \geq 0.05$  for heterogeneity between studies).



## Figure Legends

### **Figure 1 Genetic variant of *FADS* rs174570, long chain n-3 PUFAs and fish intakes and long-term BMI changes**

Effect size (ES) (95% CI) values are  $\beta$  coefficients for interaction between the *FADS* variant rs174570 (additive model) and diets from results of the NHS, HPFS, WHI, and SCHS cohorts.

Data on BMI, long chain n-3 PUFAs (food sourced EPA+ DHA and total EPA+ DHA (food and supplemental use)) and fish consumptions were assessed at baseline in the NHS (1990), the HPFS (1990), the WHI (1994-1998), and the SCHS (1993-1998), respectively.

Data on follow-up BMI was assessed in 2000 in the NHS and HPFS, in the sixth follow-up year in the WHI, and from 2006 to 2010 in the SCHS, respectively.

Long-term BMI changes were calculated based on the changes in BMI from baseline to follow-up year in the four cohorts, respectively.

The multiple linear regression model was used to test the *FADS* variant-diets interaction by including a multiplicative interaction term in the models after adjustment for age, source of genotyping data, baseline BMI, smoking, alcohol intake, physical activity, total energy intake, alternate healthy eating index, television watching, sugar sweetened beverage, fried food consumption.

The results were pooled by means of fixed effects meta-analyses ( $P \geq 0.05$  for heterogeneity between studies).

### **Figure 2 Genetic association of *FADS* variant rs174570 with long-term BMI change according to long chain n-3 PUFAs and fish intakes**

Pooled-EUR: data from NHS, HPFS, and WHI were pooled.

Pooled Multiethnic: data from NHS, HPFS, WHI and SCHS were pooled.

Data are  $\beta$  coefficients  $\pm$  SE.

Numbers of participants across three categories ( $\leq 1/\text{wk}$ / $1\sim 6/\text{wk}$ / $\geq 1/\text{d}$ ) of fish intake in the NHS, HPFS, WHI, and SCHS are 1618/8465/1239, 977/5108/748, 894/4675/684, and 752/3935/576, respectively.

1  
2  
3 Frequency of fish intake:  $\leq 1$  serving per week, 1~6 servings per week, and 1 serving per day

4  
5 Data on BMI, long chain n-3 PUFAs (food sourced EPA+ DHA and total EPA+ DHA (food and  
6  
7 supplemental use)) and fish consumptions were assessed at baseline in the NHS (1990), the HPFS (1990),  
8  
9 the WHI (1994-1998), and the SCHS (1993-1998), respectively.

10  
11 Data on follow-up BMI was assessed in 2000 in the NHS and HPFS, in the sixth follow-up year in the  
12  
13 WHI, and from 2006 to 2010 in the SCHS, respectively.

14  
15 The multiple linear regression model was used to test the genetic association of the *FADS* variant (additive  
16  
17 model) with long-term changes in BMI by frequency of fish intake and tertiles of LC fatty acids after  
18  
19 adjustment for age, source of genotyping data, baseline BMI, smoking, alcohol intake, physical activity,  
20  
21 total energy intake, alternate healthy eating index, television watching, sugar sweetened beverage, fried  
22  
23 food consumption. The results were pooled by means of fixed effects meta-analyses ( $P \geq 0.05$  for  
24  
25 heterogeneity between studies).  
26  
27  
28  
29

30  
31 **Figure 3 Predicted long-term changes in BMI from long chain n-3 PUFAs intake according to *FADS***  
32  
33 **genotypes**

34  
35 Numbers of T carriers/Non-T carriers in the NHS, HPFS, and WHI are 1698/9625, 1025/5808, and  
36  
37 876/5378, respectively.

38  
39 Black circles for T allele carriers and open circle for non-T-carriers.

40  
41 The multiple linear regression model was used to test the associations of long chain n-3 PUFAs intake with  
42  
43 long-term changes in BMI according to *FADS* genotypes after adjustment for age, source of genotyping  
44  
45 data, baseline BMI, smoking, alcohol intake, physical activity, total energy intake, alternate healthy eating  
46  
47 index, television watching, sugar sweetened beverage, fried food consumption.

48  
49 The data on food-sourced EPA+DHA was pooled from the NHS and HPFS cohorts. Data from US cohorts  
50  
51 was pooled by means of fixed effects meta-analyses ( $P \geq 0.05$  for heterogeneity between studies).  
52  
53  
54  
55  
56  
57  
58  
59

1  
2  
3 **Figure 4 Predicted long-term changes in BMI from fish intake according to *FADS* genotypes**  
4

5 Numbers of T carriers/Non-T carriers in the NHS, HPFS, and WHI are 1698/9625, 1025/5808, and  
6  
7 876/5378, respectively.  
8

9 Black circles for T allele carriers and open circle for non-T-carriers.  
10

11 The multiple linear regression model was used to test the associations of and fish intake with long-term  
12  
13 changes in BMI according to *FADS* genotypes after adjustment for age, source of genotyping data,  
14  
15 baseline BMI, smoking, alcohol intake, physical activity, total energy intake, alternate healthy eating  
16  
17 index, television watching, sugar sweetened beverage, fried food consumption.  
18

19 The data on total fish intake was pooled from the NHS, HPFS, and WHI cohorts. Data from US cohorts  
20  
21 was pooled by means of fixed effects meta-analyses (if  $P \geq 0.05$  for heterogeneity between studies).  
22  
23  
24  
25  
26  
27  
28  
29  
30  
31  
32  
33  
34  
35  
36  
37  
38  
39  
40  
41  
42  
43  
44  
45  
46  
47  
48  
49  
50  
51  
52  
53  
54  
55  
56  
57  
58  
59  
60

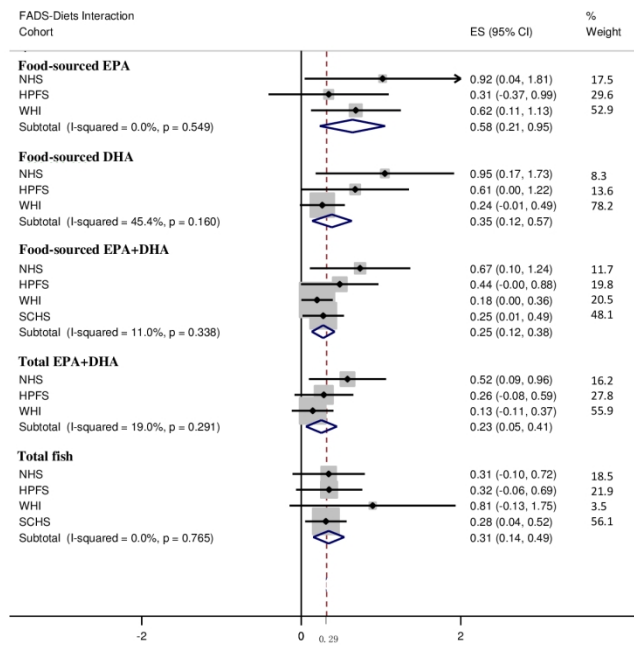

254x190mm (200 x 200 DPI)

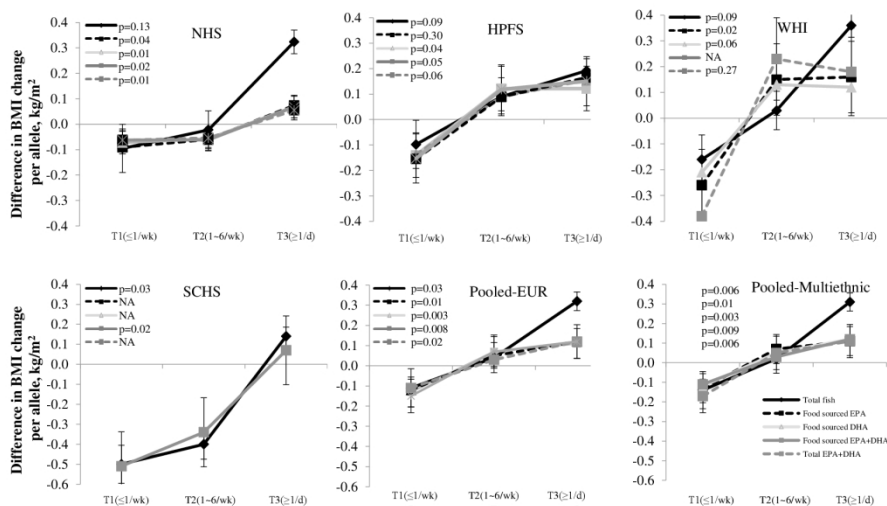

254x190mm (200 x 200 DPI)

1  
2  
3  
4  
5  
6  
7  
8  
9  
10  
11  
12  
13  
14  
15  
16  
17  
18  
19  
20  
21  
22  
23  
24  
25  
26  
27  
28  
29  
30  
31  
32  
33  
34  
35  
36  
37  
38  
39  
40  
41  
42  
43  
44  
45  
46  
47  
48  
49  
50  
51  
52  
53  
54  
55  
56  
57  
58  
59  
60

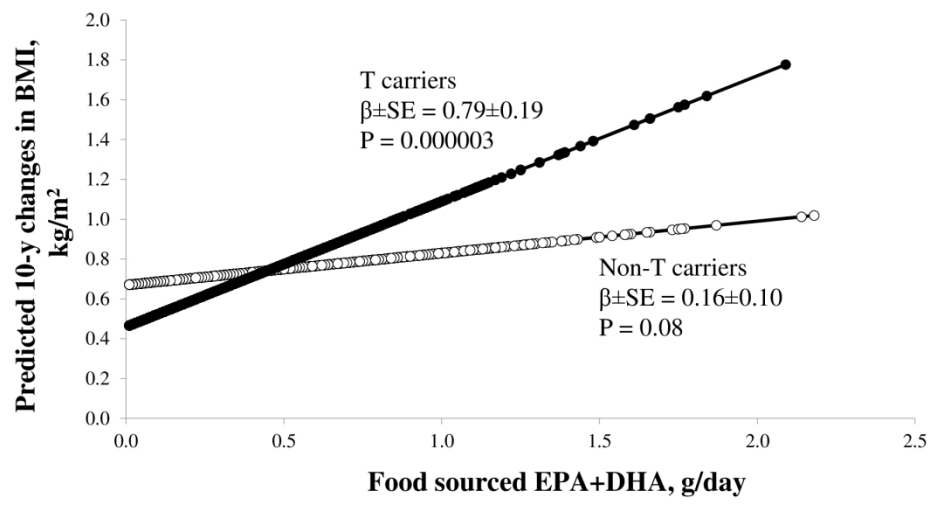

254x190mm (200 x 200 DPI)

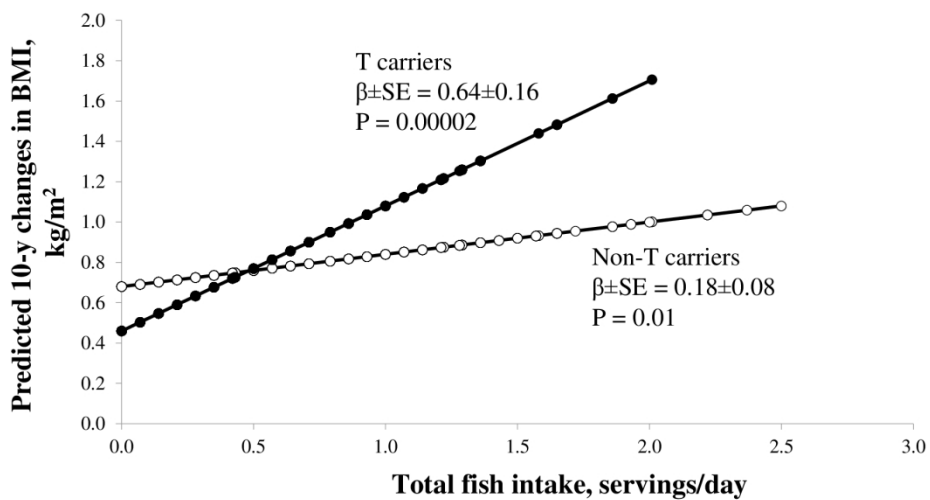

254x190mm (200 x 200 DPI)

**Supplemental table 1. Annotation for the top six SNPs under positive selection in Greenlandic Inuit**

| Position <sup>1</sup> | Reference                 |                      | DAF   |      |      |       |       |      |      | PBS  |
|-----------------------|---------------------------|----------------------|-------|------|------|-------|-------|------|------|------|
|                       | SNP identification number | Alleles <sup>2</sup> | CEU   | CHB  | GI   | NHS   | HPFS  | WHI  | SCHS |      |
|                       |                           |                      |       |      |      |       |       |      |      |      |
| chr11:61627960        | rs74771917                | C/T                  | 0.025 | 0.16 | 0.98 | /     | /     | /    | /    | 2.67 |
| chr11:61631510        | rs3168072                 | A/T                  | 0.017 | 0.18 | 0.98 | /     | /     | /    | /    | 2.64 |
| chr11:61632310        | rs12577276                | A/G                  | 0.017 | 0.18 | 0.98 | /     | /     | /    | /    | 2.64 |
| chr11:61641717        | rs7115739                 | G/T                  | 0.017 | 0.22 | 0.98 | 0.004 | 0.004 | /    | /    | 2.54 |
| chr11:61624414        | rs174602                  | C/T                  | 0.80  | 0.73 | 0.01 | 0.82  | 0.81  | /    | /    | 2.11 |
| chr11:61597212        | rs174570                  | C/T                  | 0.16  | 0.34 | 0.99 | 0.15  | 0.15  | 0.14 | 0.35 | 2.06 |

<sup>1</sup>Positions refer to human genome assembly hg19.

<sup>2</sup>Alleles are coded as ancestral/derived states.

PBS, the population branch statistic; DAF, derived allele frequency; CEU, European ancestry; CHB, an Chinese; GI, Greenlandic Inuit

DAFs for each population (CEU, CHB, and GI) and PBS values are reported, along with the genomic position for each SNP.



**Supplemental table 2 Main effect of the *FADS* variants on adiposity in the four cohorts**

| Outcomes (kg/m <sup>2</sup> ) | <i>FADS</i><br>SNPs | NHS          |       | HPFS         |       | WHI        |      | SCHS       |       | Pooled       |       |
|-------------------------------|---------------------|--------------|-------|--------------|-------|------------|------|------------|-------|--------------|-------|
|                               |                     | Beta ± SE    | P     | Beta ± SE    | P     | Beta ± SE  | P    | Beta ± SE  | P     | Beta ± SE    | P     |
| Baseline BMI                  | rs174570            | 0.03 ± 0.10  | 0.733 | -0.05 ± 0.09 | 0.538 | -0.06±0.17 | 0.72 | 0.24±0.08  | 0.002 | 0.08±0.05    | 0.06  |
| Baseline BMI                  | rs174602            | 0.08 ± 0.10  | 0.418 | -0.05 ± 0.08 | 0.536 | /          | /    | /          | /     | 0.00 ± 0.03  | 0.559 |
| Baseline BMI                  | rs7115739           | 0.25 ± 0.52  | 0.634 | -0.77 ± 0.43 | 0.077 | /          | /    | /          | /     | -0.35 ± 0.14 | 0.196 |
| Long-term BMI change          | rs174570            | -0.05 ± 0.06 | 0.401 | 0.01 ± 0.05  | 0.917 | -0.02±0.09 | 0.77 | -0.02±0.08 | 0.85  | -0.02±0.03   | 0.94  |
| Long-term BMI change          | rs174602            | -0.14 ± 0.06 | 0.009 | 0.04 ± 0.05  | 0.413 | /          | /    | /          | /     | -0.04 ± 0.01 | 0.025 |
| Long-term BMI change          | rs7115739           | 0.45 ± 0.29  | 0.124 | -0.23 ± 0.26 | 0.359 | /          | /    | /          | /     | 0.06 ± 0.08  | 0.183 |

Long-term BMI change: BMI change from 1990 to 2000.

Numbers of T carriers/Non-T carriers in the NHS, HPFS, WHI, and SCHS are 1698/9625, 1025/5808, 876/5378, and 1842/3422, respectively.

Effect size (ES) values are  $\beta$  coefficients for relationship between the *FADS* variant rs174570 (additive model) and adiposity.

The general linear model was used to test the genetic association of *FADS* variants with long-term changes in BMI after adjustment for age, source of genotyping data.

**Supplemental table 3 Genetic association of *FADS* variant with long-term changes in body weight according to long chain n-3 PUFAs and fish intakes**

|                                    | Difference in long-term changes in weight, |            |            | P for interaction |
|------------------------------------|--------------------------------------------|------------|------------|-------------------|
|                                    | kg                                         |            |            |                   |
| <b>Total Fish, serving/day</b>     | ≤1/wk                                      | 1~6/wk     | ≥1/d       |                   |
| NHS                                | -0.69±0.64                                 | -0.13±0.49 | 1.78±1.64  | 0.05              |
| HPFS                               | -0.99±0.85                                 | 0.54±0.53  | 1.52±1.69  | 0.12              |
| WHI                                | -0.22±0.42                                 | 0.16±0.34  | 1.26±1.57  | 0.13              |
| SCHS                               | -0.42±0.29                                 | -0.44±0.28 | 0.20±0.29  | 0.08              |
| Pooled                             | -0.44±0.22                                 | -0.10±0.18 | 0.31±0.28  | 0.01              |
| <b>Food-sourced EPA, g/day</b>     | T1                                         | T2         | T3         |                   |
| NHS                                | -0.77±0.62                                 | -0.25±0.72 | 0.53±0.64  | 0.06              |
| HPFS                               | -1.19±0.82                                 | 0.75±0.73  | 0.72±0.74  | 0.41              |
| WHI                                | -0.19±0.42                                 | 0.24±0.47  | 0.14±0.48  | 0.20              |
| Pooled                             | -0.50±0.32                                 | 0.24±0.34  | 0.37±0.34  | 0.10              |
| <b>Food-sourced DHA, g/day</b>     | T1                                         | T2         | T3         |                   |
| NHS                                | -0.53±0.62                                 | -0.39±0.70 | 0.53±0.65  | 0.01              |
| HPFS                               | -1.06±0.82                                 | 0.49±0.71  | 0.89±0.76  | 0.09              |
| WHI                                | -0.20±0.43                                 | 0.22±0.42  | 0.30±0.50  | 0.26              |
| Pooled                             | -0.43±0.32                                 | 0.15±0.32  | 0.49±0.35  | 0.01              |
| <b>Food-sourced EPA+DHA, g/day</b> | T1                                         | T2         | T3         |                   |
| NHS                                | -0.56±0.63                                 | -0.32±0.68 | 0.49±0.66  | 0.01              |
| HPFS                               | -1.25±0.83                                 | 0.68±0.73  | 0.84±0.74  | 0.09              |
| WHI                                | -0.02±0.43                                 | 0.16±0.44  | 0.14±0.49  | 0.23              |
| SCHS                               | -0.47±0.29                                 | -0.16±0.28 | -0.03±0.29 | 0.10              |

|                             |            |            |           |       |
|-----------------------------|------------|------------|-----------|-------|
| Pooled                      | -0.56±0.25 | -0.09±0.24 | 0.14±0.25 | 0.005 |
| <b>Total EPA+DHA, g/day</b> | <b>T1</b>  | <b>T2</b>  | <b>T3</b> |       |
| NHS                         | -0.58±0.63 | -0.30±0.68 | 0.46±0.66 | 0.02  |
| HPFS                        | -1.20±0.82 | 0.75±0.70  | 0.86±0.77 | 0.18  |
| WHI                         | -0.48±0.47 | 0.64±0.43  | 0.04±0.47 | 0.15  |
| Pooled                      | -0.64±0.34 | 0.45±0.32  | 0.32±0.34 | 0.02  |

Data are  $\beta$  coefficients  $\pm$  SE.

Numbers of T carriers/Non-T carriers in the NHS, HPFS, WHI, and SCHS are 1698/9625, 1025/5808, 876/5378, and 1842/3422, respectively.

Frequency of fish intake:  $\leq$  1 serving per week, 1~6 servings per week, and 1 serving per day

Data on baseline fish and fatty acids consumptions were assessed in 1990 (NHS) and 1990 (HPFS).

Data on body weight were assessed in 1990 and 2000 in NHS and 1990 and 2000 in HPFS.

The general linear model was used to test the genetic association with long-term changes in body weight according to baseline long chain n-3 PUFAs and fish intakes after adjustment for age, source of genotyping data, baseline body weight, smoking, alcohol intake, physical activity, total energy intake, alternate healthy eating index, television watching, sugar sweetened beverage, fried food consumption.

Data from three or four cohorts pooled by means of fixed effects meta-analyses (if  $P \geq 0.05$  for heterogeneity between studies).

**Supplemental table 4 Associations of long chain n-3 PUFAs and fish intakes with long-term changes in body weight according to *FADS* genotypes**

| Cohorts                 |                | Long-term changes in weight, kg |            |            | P for trend |
|-------------------------|----------------|---------------------------------|------------|------------|-------------|
| Total Fish, serving/day |                | ≤1/wk                           | 1~6/wk     | ≥1/d       |             |
| NHS                     | Non T carriers | 4.91±0.34                       | 5.78±0.24  | 7.00±0.79  | 0.008       |
|                         | T carriers     | 4.45±0.61                       | 5.64±0.46  | 9.26±1.44  | 0.001       |
| HPFS                    | Non T carriers | 0.44±0.06                       | 0.52±0.04  | 0.56±0.12  | 0.99        |
|                         | T carriers     | 0.25±0.10                       | 0.53±0.07  | 0.76±0.21  | 0.08        |
| WHI                     | Non T carriers | -0.25±0.23                      | -0.43±0.18 | -0.91±0.93 | 0.50        |
|                         | T carriers     | -0.56±0.37                      | -0.25±0.28 | 1.30±1.71  | 0.13        |
| SCHS                    | Non T carriers | -3.15±0.23                      | -3.50±0.21 | -3.38±0.21 | 0.48        |
|                         | T carriers     | -3.68±0.20                      | -3.41±0.19 | -3.34±0.20 | 0.16        |
| Food-sourced EPA, g/day |                | T1                              | T2         | T3         |             |
| NHS                     | Non T carriers | 4.89±0.33                       | 5.89±0.33  | 5.95±0.33  | 0.24        |
|                         | T carriers     | 4.45±0.59                       | 5.52±0.63  | 6.46±0.61  | 0.34        |
| HPFS                    | Non T carriers | 0.50±0.05                       | 0.54±0.05  | 0.45±0.05  | 0.15        |
|                         | T carriers     | 0.29±0.10                       | 0.54±0.09  | 0.52±0.09  | 0.66        |
| WHI                     | Non T carriers | -0.30±0.25                      | -0.54±0.24 | -0.29±0.24 | 0.42        |
|                         | T carriers     | -0.51±0.39                      | -0.36±0.37 | -0.15±0.38 | 0.14        |
| Food-sourced DHA, g/day |                | T1                              | T2         | T3         |             |
| NHS                     | Non T carriers | 4.78±0.33                       | 5.56±0.34  | 6.32±0.33  | 0.14        |
|                         | T carriers     | 4.50±0.60                       | 5.07±0.63  | 6.77±0.61  | 0.004       |
| HPFS                    | Non T carriers | 0.48±0.05                       | 0.54±0.05  | 0.46±0.06  | 0.40        |
|                         | T carriers     | 0.27±0.10                       | 0.50±0.09  | 0.59±0.09  | 0.15        |
| WHI                     | Non T carriers | -0.41±0.25                      | -0.25±0.24 | -0.45±0.25 | 0.51        |

|                                    |                |  |            |            |            |        |
|------------------------------------|----------------|--|------------|------------|------------|--------|
|                                    | T carriers     |  | -0.71±0.39 | -0.15±0.37 | -0.16±0.39 | 0.18   |
| <b>Food-sourced EPA+DHA, g/day</b> |                |  | T1         | T2         | T3         |        |
| NHS                                | Non T carriers |  | 4.69±0.34  | 5.45±0.33  | 6.51±0.33  | 0.02   |
|                                    | T carriers     |  | 4.44±0.61  | 5.00±0.61  | 6.92±0.61  | 0.0003 |
| HPFS                               | Non T carriers |  | 0.48±0.05  | 0.53±0.05  | 0.47±0.05  | 0.93   |
|                                    | T carriers     |  | 0.26±0.10  | 0.49±0.09  | 0.59±0.09  | 0.08   |
| WHI                                | Non T carriers |  | -0.44±0.24 | -0.23±0.23 | -0.43±0.24 | 0.47   |
|                                    | T carriers     |  | -0.52±0.38 | -0.15±0.37 | -0.33±0.38 | 0.15   |
| SCHS                               | Non T carriers |  | -3.44±0.21 | -3.58±0.22 | -3.05±0.21 | 0.89   |
|                                    | T carriers     |  | -3.73±0.19 | -3.57±0.19 | -3.12±0.19 | 0.12   |
| <b>Total EPA+DHA, g/day</b>        |                |  | T1         | T2         | T3         |        |
| NHS                                | Non T carriers |  | 4.74±0.34  | 5.55±0.32  | 6.36±0.34  | 0.81   |
|                                    | T carriers     |  | 4.49±0.61  | 5.16±0.60  | 6.70±0.61  | 0.03   |
| HPFS                               | Non T carriers |  | 0.49±0.05  | 0.53±0.05  | 0.47±0.06  | 0.24   |
|                                    | T carriers     |  | 0.26±0.10  | 0.51±0.09  | 0.58±0.09  | 0.33   |
| WHI                                | Non T carriers |  | 0.32±0.27  | -0.84±0.23 | -0.60±0.28 | 0.19   |
|                                    | T carriers     |  | -0.26±0.45 | -0.21±0.37 | -0.02±0.11 | 0.08   |

Data on baseline fish and fatty acids consumptions were assessed in 1990 (NHS) and 1990 (HPFS).

Numbers of T carriers/Non-T carriers in the NHS, HPFS, WHI, and SCHS are 1698/9625, 1025/5808, 876/5378, and 1842/3422, respectively.

Data on body weight were assessed in 1990 and 2000 in NHS and 1990 and 2000 in HPFS.

The general linear model was used to test the associations of long chain n-3 PUFAs and fish intakes with long-term changes in body weight by *FADS* genotypes after adjustment for age, source of genotyping data, baseline body weight, smoking, alcohol intake, physical activity, total energy intake, alternate healthy eating index, television watching, sugar sweetened beverage, fried food consumption.

Data from two cohorts pooled by means of fixed effects meta-analyses (if  $P \geq 0.05$  for heterogeneity between studies) or random effects meta-analyses (if  $P < 0.05$  for heterogeneity between studies).

**Supplemental Table 5 Associations of long chain n-3 PUFAs and fish intakes with long-term changes in BMI according to *FADS* genotypes**

| Diets                   | <i>FADS</i> genotypes | Long chain n-3 PUFAs and fish intakes |           |           | P for trend        | P for interaction* |
|-------------------------|-----------------------|---------------------------------------|-----------|-----------|--------------------|--------------------|
|                         |                       | Categories of diets                   |           |           |                    |                    |
| Food-sourced EPA, g/day |                       | T1                                    | T2        | T3        |                    |                    |
| NHS                     | Non-T carriers        | 0.82±0.06                             | 1.00±0.06 | 1.01±0.06 | 0.24               | 0.05               |
|                         | T carriers            | 0.72±0.10                             | 0.94±0.11 | 1.10±0.11 | 0.29               |                    |
| HPFS                    | Non-T carriers        | 0.48±0.05                             | 0.54±0.05 | 0.47±0.05 | 0.72               | 0.37               |
|                         | T carriers            | 0.23±0.11                             | 0.54±0.10 | 0.52±0.09 | 0.45               |                    |
| WHI                     | Non-T carriers        | 0.10±0.09                             | 0.09±0.09 | 0.45±0.09 | 0.21               | 0.02               |
|                         | T carriers            | -0.08±0.15                            | 0.23±0.15 | 0.46±0.15 | 0.003              |                    |
| Pooled                  | Non-T carriers        | 0.54±0.04                             | 0.63±0.04 | 0.65±0.04 | 0.35               | 0.01               |
|                         | T carriers            | 0.39±0.07                             | 0.63±0.07 | 0.70±0.06 | 0.01               |                    |
| Food-sourced DHA, g/day |                       | T1                                    | T2        | T3        |                    |                    |
| NHS                     | Non-T carriers        | 0.80±0.06                             | 0.94±0.06 | 1.08±0.06 | 0.14               | 0.009              |
|                         | T carriers            | 0.74±0.10                             | 0.83±0.11 | 1.17±0.10 | 0.002              |                    |
| HPFS                    | Non-T carriers        | 0.46±0.05                             | 0.54±0.05 | 0.49±0.05 | 0.99               | 0.05               |
|                         | T carriers            | 0.24±0.10                             | 0.49±0.10 | 0.58±0.09 | 0.05               |                    |
| WHI                     | Non-T carriers        | 0.03±0.09                             | 0.20±0.09 | 0.42±0.09 | 0.03               | 0.06               |
|                         | T carriers            | -0.10±0.15                            | 0.33±0.15 | 0.39±0.15 | 0.006              |                    |
| Pooled                  | Non-T carriers        | 0.51±0.04                             | 0.63±0.04 | 0.68±0.04 | 0.1                | 0.002              |
|                         | T carriers            | 0.38±0.06                             | 0.58±0.07 | 0.77±0.06 | 7×10 <sup>-4</sup> |                    |

Data are means ± SE.

<sup>1</sup>P for interaction was generated from dominant model of *FADS* rs174570 (CC vs CT+TT).

Numbers of T carriers/Non-T carriers in the NHS, HPFS, WHI, and SCHS are 1698/9625, 1025/5808, 876/5378, and 1842/3422, respectively.

Data on BMI, long chain n-3 PUFAs consumptions were assessed at baseline in the NHS (1990), the HPFS (1990), the WHI (1994-1998), and the SCHS (1993-1998), respectively.

Data on follow-up BMI was assessed in 2000 in the NHS and HPFS, in the sixth follow-up year in the

1  
2  
3  
4  
5  
6 WHI, and from 2006 to 2010 in the SCHS, respectively.

7  
8 Long-term BMI changes were calculated based on the changes in BMI from baseline to follow-up year in  
9  
10 the four cohorts, respectively.

11  
12 The general linear model was used to test the associations of long chain n-3 PUFAs and fish intakes with  
13  
14 long-term changes in BMI by *FADS* genotypes after adjustment for age, source of genotyping data,  
15  
16 baseline BMI, smoking, alcohol intake, physical activity, total energy intake, alternate healthy eating index,  
17  
18 television watching, sugar sweetened beverage, fried food consumption.

19  
20 The results were pooled by means of fixed effects meta-analyses (if  $P \geq 0.05$  for heterogeneity between  
21  
22 studies).

23  
24 Registration: [www. clinicaltrials.gov](http://www.clinicaltrials.gov). Registration ID: NCT03348566  
25  
26  
27  
28  
29  
30  
31  
32  
33  
34  
35  
36  
37  
38  
39  
40  
41  
42  
43  
44  
45  
46  
47  
48  
49  
50  
51  
52  
53  
54  
55  
56  
57  
58  
59  
60

1  
2  
3  
4  
5  
6  
7  
8  
9  
10  
11  
12  
13  
14  
15  
16  
17  
18  
19  
20  
21  
22  
23  
24  
25  
26  
27  
28  
29  
30  
31  
32  
33  
34  
35  
36  
37  
38  
39  
40  
41  
42  
43  
44  
45  
46  
47

**TABLE 1. STREGA reporting recommendations, extended from STROBE Statement**

| Item                        | Item number | STROBE Guideline                                                                                                   | Extension for Genetic Association Studies (STREGA)                                                            |
|-----------------------------|-------------|--------------------------------------------------------------------------------------------------------------------|---------------------------------------------------------------------------------------------------------------|
| <b>Title and Abstract</b>   | 1           | (a) Indicate the study’s design with a commonly used term in the title or the abstract. <b>(p. 3)</b>              |                                                                                                               |
|                             |             | (b) Provide in the abstract an informative and balanced summary of what was done and what was found. <b>(p. 3)</b> |                                                                                                               |
| <b>Introduction</b>         |             |                                                                                                                    |                                                                                                               |
| <i>Background rationale</i> | 2           | Explain the scientific background and rationale for the investigation being reported. <b>(p. 4)</b>                |                                                                                                               |
| <i>Objectives</i>           | 3           | State specific objectives, including any pre-specified hypotheses.                                                 | <b>State if the study is the first report of a genetic association, a replication effort, or both. (p. 3)</b> |
| <b>Methods</b>              |             |                                                                                                                    |                                                                                                               |
| <i>Study design</i>         | 4           | Present key elements of study design early in the paper. <b>(p. 5)</b>                                             |                                                                                                               |



| Item                | Item number | STROBE Guideline                                                                                                                                                                                                                                                                                                                                                                                                                                                                                                                                                                                                                                                                                                                                      | Extension for Genetic Association Studies (STREGA)                                                                                                                                                                              |
|---------------------|-------------|-------------------------------------------------------------------------------------------------------------------------------------------------------------------------------------------------------------------------------------------------------------------------------------------------------------------------------------------------------------------------------------------------------------------------------------------------------------------------------------------------------------------------------------------------------------------------------------------------------------------------------------------------------------------------------------------------------------------------------------------------------|---------------------------------------------------------------------------------------------------------------------------------------------------------------------------------------------------------------------------------|
| <i>Setting</i>      | 5           | Describe the setting, locations and relevant dates, including periods of recruitment, exposure, follow-up, and data collection. <b>(p. 3)</b>                                                                                                                                                                                                                                                                                                                                                                                                                                                                                                                                                                                                         |                                                                                                                                                                                                                                 |
| <i>Participants</i> | 6           | <p>(a) <b>Cohort study</b> – Give the eligibility criteria, and the sources and methods of selection of participants. Describe methods of follow-up. <b>(p. 5)</b></p> <p><b>Case-control study</b> – Give the eligibility criteria, and the sources and methods of case ascertainment and control selection. Give the rationale for the choice of cases and controls.</p> <p><b>Cross-sectional study</b> – Give the eligibility criteria, and the sources and methods of selection of participants.</p> <hr/> <p>(b) <b>Cohort study</b> – For matched studies, give matching criteria and number of exposed and unexposed.</p> <p><b>Case-control study</b> – For matched studies, give matching criteria and the number of controls per case.</p> | <b><i>Give information on the criteria and methods for selection of subsets of participants from a larger study, when relevant. (p. 5)</i></b>                                                                                  |
| <i>Variables</i>    | 7           | <b>(a)</b> Clearly define all outcomes, exposures, predictors, potential confounders, and effect modifiers. Give diagnostic criteria, if applicable. <b>(p. 5)</b>                                                                                                                                                                                                                                                                                                                                                                                                                                                                                                                                                                                    | <b><i>(b) Clearly define genetic exposures (genetic variants) using a widely-used nomenclature system. Identify variables likely to be associated with population stratification (confounding by ethnic origin). (p. 5)</i></b> |

1  
2  
3  
4  
5  
6  
7  
8  
9  
10  
11  
12  
13  
14  
15  
16  
17  
18  
19  
20  
21  
22  
23  
24  
25  
26  
27  
28  
29  
30  
31  
32  
33  
34  
35  
36  
37  
38  
39  
40  
41  
42  
43  
44  
45  
46  
47

| Item                            | Item number | STROBE Guideline                                                                                                                                                                                        | Extension for Genetic Association Studies (STREGA)                                                                                                                                                                                                                                                                                                                                                                                                                       |
|---------------------------------|-------------|---------------------------------------------------------------------------------------------------------------------------------------------------------------------------------------------------------|--------------------------------------------------------------------------------------------------------------------------------------------------------------------------------------------------------------------------------------------------------------------------------------------------------------------------------------------------------------------------------------------------------------------------------------------------------------------------|
| <i>Data sources measurement</i> | 8*          | <i>(a)</i> For each variable of interest, give sources of data and details of methods of assessment (measurement). Describe comparability of assessment methods if there is more than one group. (p. 5) | <i>(b)</i> Describe laboratory methods, including source and storage of DNA, genotyping methods and platforms (including the allele calling algorithm used, and its version), error rates and call rates. State the laboratory/centre where genotyping was done. Describe comparability of laboratory methods if there is more than one group. Specify whether genotypes were assigned using all of the data from the study simultaneously or in smaller batches. (p. 5) |
| <i>Bias</i>                     | 9           | <i>(a)</i> Describe any efforts to address potential sources of bias. (p. 5 &6)                                                                                                                         | <i>(b)</i> For quantitative outcome variables, specify if any investigation of potential bias resulting from pharmacotherapy was undertaken. If relevant, describe the nature and magnitude of the potential bias, and explain what approach was used to deal                                                                                                                                                                                                            |

| Item                          | Item number | STROBE Guideline                                                                                                                                                                                                                                                                                                                                                                                                                                                                                                                                                                                                                         | Extension for Genetic Association Studies (STREGA)                                     |
|-------------------------------|-------------|------------------------------------------------------------------------------------------------------------------------------------------------------------------------------------------------------------------------------------------------------------------------------------------------------------------------------------------------------------------------------------------------------------------------------------------------------------------------------------------------------------------------------------------------------------------------------------------------------------------------------------------|----------------------------------------------------------------------------------------|
|                               |             |                                                                                                                                                                                                                                                                                                                                                                                                                                                                                                                                                                                                                                          | <i>with this. (p. 5 &amp;6)</i>                                                        |
| <i>Study size</i>             | 10          | Explain how the study size was arrived at. <b>(p. 5 &amp;6)</b>                                                                                                                                                                                                                                                                                                                                                                                                                                                                                                                                                                          |                                                                                        |
| <i>Quantitative variables</i> | 11          | Explain how quantitative variables were handled in the analyses. If applicable, describe which groupings were chosen, and why. <b>(p. 7)</b>                                                                                                                                                                                                                                                                                                                                                                                                                                                                                             | <b><i>If applicable, describe how effects of treatment were dealt with. (p. 7)</i></b> |
| <i>Statistical methods</i>    | 12          | <p>(a) Describe all statistical methods, including those used to control for confounding. <b>(p. 7-9)</b></p> <hr/> <p>(b) Describe any methods used to examine subgroups and interactions. <b>(p. 9)</b></p> <hr/> <p>(c) Explain how missing data were addressed. <b>(p. 9)</b></p> <hr/> <p>(d) <b>Cohort study</b> – If applicable, explain how loss to follow-up was addressed. <b>(p. 9)</b></p> <p><b>Case-control study</b> – If applicable, explain how matching of cases and controls was addressed.</p> <p><b>Cross-sectional study</b> – If applicable, describe analytical methods taking account of sampling strategy.</p> | <b><i>State software version used and options (or settings) chosen. (p. 9)</i></b>     |

1  
2  
3  
4  
5  
6  
7  
8  
9  
10  
11  
12  
13  
14  
15  
16  
17  
18  
19  
20  
21  
22  
23  
24  
25  
26  
27  
28  
29  
30  
31  
32  
33  
34  
35  
36  
37  
38  
39  
40  
41  
42  
43  
44  
45  
46  
47

| Item | Item number | STROBE Guideline                                                                                                                                                                                                 | Extension for Genetic Association Studies (STREGA)                                                                         |
|------|-------------|------------------------------------------------------------------------------------------------------------------------------------------------------------------------------------------------------------------|----------------------------------------------------------------------------------------------------------------------------|
|      |             | (e) Describe any sensitivity analyses. (p. 9)                                                                                                                                                                    |                                                                                                                            |
|      |             | Hardy-Weinberg equilibrium was tested using Chi-square test. (p. 9)                                                                                                                                              | <b>(f) State whether Hardy-Weinberg equilibrium was considered and, if so, how.</b>                                        |
|      |             | We assumed that each SNP in the panel acts independently in an additive manner. We coded the SNPs as following: rs174570 (TT=2, TC=1, CC=0); rs174602 (TT=2, TC=1, CC=0); rs7115739 (TT=2, TG=1, GG=0). (p. 8&9) | <b>(g) Describe any methods used for inferring genotypes or haplotypes.</b>                                                |
|      |             |                                                                                                                                                                                                                  | <b>(h) Describe any methods used to assess or address population stratification. (p. 9)</b>                                |
|      |             |                                                                                                                                                                                                                  | <b>(i) Describe any methods used to address multiple comparisons or to control risk of false positive findings. (p. 9)</b> |
|      |             |                                                                                                                                                                                                                  | <b>(j) Describe any methods used to address and correct for relatedness among subjects(p. 9)</b>                           |

| Item                    | Item number | STROBE Guideline                                                                                                                                                                                                                                                                                                                                                                                       | Extension for Genetic Association Studies (STREGA)                                                                                                        |
|-------------------------|-------------|--------------------------------------------------------------------------------------------------------------------------------------------------------------------------------------------------------------------------------------------------------------------------------------------------------------------------------------------------------------------------------------------------------|-----------------------------------------------------------------------------------------------------------------------------------------------------------|
| <b>Results</b>          |             |                                                                                                                                                                                                                                                                                                                                                                                                        |                                                                                                                                                           |
| <i>Participants</i>     | 13*         | <p>(a) Report the numbers of individuals at each stage of the study – e.g., numbers potentially eligible, examined for eligibility, confirmed eligible, included in the study, completing follow-up, and analysed. <b>(p. 10)</b></p> <hr/> <p>(b) Give reasons for non-participation at each stage. <b>(p. 10)</b></p> <hr/> <p>(c) Consider use of a flow diagram. <b>(p. 10)</b></p>                | <p><b><i>Report numbers of individuals in whom genotyping was attempted and numbers of individuals in whom genotyping was successful. (p. 10)</i></b></p> |
| <i>Descriptive data</i> | 14*         | <p>(a) Give characteristics of study participants (e.g., demographic, clinical, social) and information on exposures and potential confounders. <b>(p. 10)</b></p> <hr/> <p>(b) Indicate the number of participants with missing data for each variable of interest. <b>(p. 10)</b></p> <hr/> <p>(c) <b>Cohort study</b> – Summarize follow-up time, e.g. average and total amount. <b>(p. 10)</b></p> | <p><b><i>Consider giving information by genotype. (p. 10)</i></b></p>                                                                                     |

1  
2  
3  
4  
5  
6  
7  
8  
9  
10  
11  
12  
13  
14  
15  
16  
17  
18  
19  
20  
21  
22  
23  
24  
25  
26  
27  
28  
29  
30  
31  
32  
33  
34  
35  
36  
37  
38  
39  
40  
41  
42  
43  
44  
45  
46  
47

| Item                | Item number | STROBE Guideline                                                                                                                                                                                                                | Extension for Genetic Association Studies (STREGA)                       |
|---------------------|-------------|---------------------------------------------------------------------------------------------------------------------------------------------------------------------------------------------------------------------------------|--------------------------------------------------------------------------|
| <i>Outcome data</i> | 15 *        | <b>Cohort study</b> -Report numbers of outcome events or summary measures over time.                                                                                                                                            | <b>Report outcomes (phenotypes) for each genotype category over time</b> |
|                     |             | <b>Case-control study</b> – Report numbers in each exposure category, or summary measures of exposure.                                                                                                                          | <b>Report numbers in each genotype category</b>                          |
|                     |             | <b>Cross-sectional study</b> – Report numbers of outcome events or summary measures.                                                                                                                                            | <b>Report outcomes (phenotypes) for each genotype category</b>           |
| <i>Main results</i> | 16          | (a) Give unadjusted estimates and, if applicable, confounder-adjusted estimates and their precision (e.g., 95% confidence intervals). Make clear which confounders were adjusted for and why they were included. <b>(p. 10)</b> | <b>(d) Report results of any adjustments for multiple</b>                |
|                     |             | (b) Report category boundaries when continuous variables were categorized. <b>(p. 10)</b>                                                                                                                                       |                                                                          |
|                     |             | (c) If relevant, consider translating estimates of relative risk into absolute risk for a meaningful time period. <b>(p. 10)</b>                                                                                                |                                                                          |

| Item                  | Item number | STROBE Guideline                                                                                                                                                    | Extension for Genetic Association Studies (STREGA)                                                                                 |
|-----------------------|-------------|---------------------------------------------------------------------------------------------------------------------------------------------------------------------|------------------------------------------------------------------------------------------------------------------------------------|
|                       |             |                                                                                                                                                                     | <i>comparisons. (p. 10)</i>                                                                                                        |
| <i>Other analyses</i> | 17          | (a) Report other analyses done – e.g., analyses of subgroups and interactions, and sensitivity analyses. (p. 10)                                                    |                                                                                                                                    |
|                       |             |                                                                                                                                                                     | <i>(b) If numerous genetic exposures (genetic variants) were examined, summarize results from all analyses undertaken. (p. 10)</i> |
|                       |             |                                                                                                                                                                     | <i>(c) If detailed results are available elsewhere, state how they can be accessed. (p. 10)</i>                                    |
| <b>Discussion</b>     |             |                                                                                                                                                                     |                                                                                                                                    |
| <i>Key results</i>    | 18          | Summarize key results with reference to study objectives. (p. 11)                                                                                                   |                                                                                                                                    |
| <i>Limitations</i>    | 19          | Discuss limitations of the study, taking into account sources of potential bias or imprecision. Discuss both direction and magnitude of any potential bias. (p. 11) |                                                                                                                                    |

1  
2  
3  
4  
5  
6  
7  
8  
9  
10  
11  
12  
13  
14  
15  
16  
17  
18  
19  
20  
21  
22  
23  
24  
25  
26  
27  
28  
29  
30  
31  
32  
33  
34  
35  
36  
37  
38  
39  
40  
41  
42  
43  
44  
45  
46  
47

| Item                     | Item number | STROBE Guideline                                                                                                                                                                           | Extension for Genetic Association Studies (STREGA) |
|--------------------------|-------------|--------------------------------------------------------------------------------------------------------------------------------------------------------------------------------------------|----------------------------------------------------|
| <i>Interpretation</i>    | 20          | Give a cautious overall interpretation of results considering objectives, limitations, multiplicity of analyses, results from similar studies, and other relevant evidence. <b>(p. 11)</b> |                                                    |
| <i>Generalizability</i>  | 21          | Discuss the generalizability (external validity) of the study results. <b>(p. 11)</b>                                                                                                      |                                                    |
| <b>Other Information</b> |             |                                                                                                                                                                                            |                                                    |
| <i>Funding</i>           | 22          | Give the source of funding and the role of the funders for the present study and, if applicable, for the original study on which the present article is based. <b>(p. 14)</b>              |                                                    |

STREGA = STrengthening the REporting of Genetic Association studies; STROBE = STrengthening the Reporting of Observational Studies in Epidemiology.

\* Give information separately for cases and controls in case-control studies and, if applicable, for exposed and unexposed groups in cohort and cross-sectional studies.



# BMJ Open

## Fish and marine fatty acids intakes, the FADS genotypes and long-term weight gain: a prospective cohort study

|                               |                                                                                                                                                                                                                                                                                                                                                                                                                                                                                                                                                                                                                                                                                                                                                                                                                                                                                                                                                                                                                                                                                                                                                                                                                                                                                                                                                                                                                                                                                                                                                                                                                                                                                                                                                                                                                                                                                                                                                                                                                                                                                                                                                 |
|-------------------------------|-------------------------------------------------------------------------------------------------------------------------------------------------------------------------------------------------------------------------------------------------------------------------------------------------------------------------------------------------------------------------------------------------------------------------------------------------------------------------------------------------------------------------------------------------------------------------------------------------------------------------------------------------------------------------------------------------------------------------------------------------------------------------------------------------------------------------------------------------------------------------------------------------------------------------------------------------------------------------------------------------------------------------------------------------------------------------------------------------------------------------------------------------------------------------------------------------------------------------------------------------------------------------------------------------------------------------------------------------------------------------------------------------------------------------------------------------------------------------------------------------------------------------------------------------------------------------------------------------------------------------------------------------------------------------------------------------------------------------------------------------------------------------------------------------------------------------------------------------------------------------------------------------------------------------------------------------------------------------------------------------------------------------------------------------------------------------------------------------------------------------------------------------|
| Journal:                      | <i>BMJ Open</i>                                                                                                                                                                                                                                                                                                                                                                                                                                                                                                                                                                                                                                                                                                                                                                                                                                                                                                                                                                                                                                                                                                                                                                                                                                                                                                                                                                                                                                                                                                                                                                                                                                                                                                                                                                                                                                                                                                                                                                                                                                                                                                                                 |
| Manuscript ID                 | bmjopen-2018-022877.R3                                                                                                                                                                                                                                                                                                                                                                                                                                                                                                                                                                                                                                                                                                                                                                                                                                                                                                                                                                                                                                                                                                                                                                                                                                                                                                                                                                                                                                                                                                                                                                                                                                                                                                                                                                                                                                                                                                                                                                                                                                                                                                                          |
| Article Type:                 | Research                                                                                                                                                                                                                                                                                                                                                                                                                                                                                                                                                                                                                                                                                                                                                                                                                                                                                                                                                                                                                                                                                                                                                                                                                                                                                                                                                                                                                                                                                                                                                                                                                                                                                                                                                                                                                                                                                                                                                                                                                                                                                                                                        |
| Date Submitted by the Author: | 07-Apr-2019                                                                                                                                                                                                                                                                                                                                                                                                                                                                                                                                                                                                                                                                                                                                                                                                                                                                                                                                                                                                                                                                                                                                                                                                                                                                                                                                                                                                                                                                                                                                                                                                                                                                                                                                                                                                                                                                                                                                                                                                                                                                                                                                     |
| Complete List of Authors:     | <p>Huang, Tao; Peking University, Department of Epidemiology and Biostatistics</p> <p>Wang, Tiange ; Shanghai Jiao Tong University, Shanghai Institute of Endocrine and Metabolic Diseases</p> <p>Heianza, Yoriko ; Department of Epidemiology, School of Public Health and Tropical Medicine, Tulane University</p> <p>Wiggs, Janey ; Harvard Medical School, Department of Ophthalmology</p> <p>Sun, Dianjianyi ; School of Public Health and Tropical Medicine, Tulane University</p> <p>Choi, Hyon-Kyoo ; Massachusetts General Hospital - Harvard Medical School Center for Nervous System Repair</p> <p>Chai, Jin Fang ; National University Singapore Yong Loo Lin School of Medicine</p> <p>Sim, Xueling ; National University of Singapore, Epidemiology Domain, Saw Swee Hock School of Public Health</p> <p>Khor, Chiea Chuen ; National University of Singapore, Department of Biochemistry, Yong Loo Lin School of Medicine</p> <p>Friedlander, Yechiel ; Hebrew University, Unit of Epidemiology</p> <p>Chan, Andrew T. ; Massachusetts General Hospital, Division of Gastroenterology</p> <p>Curhan, Gary ; Harvard University T H Chan School of Public Health, Department of Epidemiology</p> <p>Vivo, Immaculata De ; Harvard University T H Chan School of Public Health, Department of Epidemiology</p> <p>van Dam, Rob Martinu. ; National University of Singapore, Department of Epidemiology</p> <p>Heng, Chew Kiat ; National University of Singapore, Department of Paediatrics</p> <p>Fuchs, Charles ; Harvard Medical School, Department of Medicine, Brigham and Women's Hospital</p> <p>Pasquale, Louis R. ; Harvard Medical School, Channing Division of Network Medicine, Department of Medicine</p> <p>Yuan, Jian-min ; University of Pittsburgh, Division of Cancer Control and Population Sciences</p> <p>Hu, Frank B. ; Harvard University T H Chan School of Public Health, Department of Epidemiology</p> <p>Koh, Woon Puay ; National University of Singapore, Department of Epidemiology</p> <p>Qi, Lu; Tulane University, Department of Epidemiology, School of Public Health and Tropical Medicine</p> |

1  
2  
3  
4  
5  
6  
7  
8  
9  
10  
11  
12  
13  
14  
15  
16  
17  
18  
19  
20  
21  
22  
23  
24  
25  
26  
27  
28  
29  
30  
31  
32  
33  
34  
35  
36  
37  
38  
39  
40  
41  
42  
43  
44  
45  
46  
47  
48  
49  
50  
51  
52  
53  
54  
55  
56  
57  
58  
59  
60

|                                  |                                                                                |
|----------------------------------|--------------------------------------------------------------------------------|
| <b>Primary Subject Heading</b> : | Nutrition and metabolism                                                       |
| Secondary Subject Heading:       | Diabetes and endocrinology, Epidemiology, Genetics and genomics, Public health |
| Keywords:                        | NUTRITION & DIETETICS, GENETICS, EPIDEMIOLOGY, obesity, gene-diet interaction  |
|                                  |                                                                                |

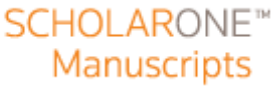

1  
2  
3 **Fish and marine fatty acids intakes, the *FADS* genotypes and long-term weight gain: a prospective**  
4 **cohort study**  
5

6  
7 Tao Huang<sup>1,2,3\*</sup>, Tiange Wang<sup>4</sup>, Yoriko Heianza<sup>5</sup>, Janey Wiggs<sup>6</sup>, Dianjianyi Sun<sup>5</sup>, Hyon-Kyoo Choi<sup>7</sup>, Jin  
8 Fang Chai<sup>8</sup>, Xueling Sim<sup>8</sup>, Chiea Chuen Khor<sup>9,10</sup>, Yechiel Friedlander<sup>11</sup>, Andrew T. Chan<sup>12</sup>, Gary Curhan<sup>13</sup>,  
9 Immaculata De Vivo<sup>13</sup>, Rob Martinu. van Dam<sup>8,14</sup>, Chew Kiat Heng<sup>15</sup>, Charles S. Fuchs<sup>16,17</sup>, Louis R.  
10 Pasquale<sup>18</sup>, Jian-min Yuan<sup>19,20</sup>, Frank B. Hu<sup>14, 16</sup>, Woon Puay Koh<sup>8, 21</sup>, Lu Qi<sup>5, 14, 16\*</sup>  
11

12  
13  
14  
15  
16 <sup>1.</sup> *Department of Epidemiology and Biostatistics, School of Public Health, Peking University, Beijing 100191, China.*

17 <sup>2.</sup> *Department of Global Health, School of Public Health, Peking University, China.*

18 <sup>3.</sup> *Key Laboratory of Molecular Cardiovascular Sciences, Ministry of Education, China.*

19 <sup>4.</sup> *Shanghai Institute of Endocrine and Metabolic Diseases, Rui Jin Hospital, Shanghai Jiao Tong University School*  
20 *of Medicine, Shanghai, China.*

21 <sup>5.</sup> *Department of Epidemiology, School of Public Health and Tropical Medicine, Tulane University, 1440 Canal*  
22 *Street, Suite 1724 New Orleans, LA 70112.*

23 <sup>6.</sup> *Department of Ophthalmology, Harvard Medical School, Massachusetts Eye and Ear Infirmary, Boston, MA 02115,*  
24 *USA.*

25 <sup>7.</sup> *Department of Rheumatology, Massachusetts General Hospital and Harvard Medical School, Boston, MA 02115,*  
26 *USA.*

27 <sup>8.</sup> *Epidemiology Domain, Saw Swee Hock School of Public Health, National University of Singapore, Singapore,*  
28 *117549.*

29 <sup>9.</sup> *Genome Institute of Singapore, Agency for Science, Technology and Research, Singapore.*

30 <sup>10.</sup> *Department of Biochemistry, Yong Loo Lin School of Medicine, National University of Singapore, Singapore.*

31 <sup>11.</sup> *Unit of Epidemiology, Hebrew University-Hadassah Braun School of Public Health, POB 12272, Jerusalem 91120,*  
32 *Israel.*

33 <sup>12.</sup> *Division of Gastroenterology, Massachusetts General Hospital, Boston, MA 02114, USA.*

34 <sup>13.</sup> *Department of Epidemiology, Harvard School of Public Health, Boston, MA 02115, USA.*

35 <sup>14.</sup> *Department of Nutrition, Harvard School of Public Health, Boston, MA 02115, USA.*

36 <sup>15.</sup> *Department of Paediatrics, National University of Singapore NUHS Tower Block, Level 12, 1E Kent Ridge Road*  
37 *Singapore 119228.*  
38  
39  
40  
41  
42  
43  
44  
45  
46  
47  
48  
49  
50  
51  
52  
53  
54  
55  
56  
57  
58  
59  
60

1  
2  
3 <sup>16</sup>Department of Medicine, Brigham and Women's Hospital and Harvard Medical School Boston, MA 02115, USA.

4  
5 <sup>17</sup>The Center for Gastrointestinal Cancer, Dana-Farber Cancer Institute, Boston, USA.

6  
7 <sup>18</sup>Channing Division of Network Medicine, Department of Medicine, Brigham and Women's Hospital and Harvard  
8  
9 Medical School, Boston, MA 02115, USA.

10  
11 <sup>19</sup>Division of Cancer Control and Population Sciences, University of Pittsburgh Cancer Institute, Pittsburgh, PA,  
12  
13 USA.

14  
15 <sup>20</sup>Department of Epidemiology, University of Pittsburgh Graduate School of Public Health, Pittsburgh, PA, USA.

16  
17 <sup>21</sup>Duke-NUS Medical School, Singapore, Singapore.

18  
19  
20  
21 Registration: [www.clinicaltrials.gov](http://www.clinicaltrials.gov). Registration ID: NCT03348566

22  
23 **Running title:** Genetic adaptation, fish, and weight change

24  
25 **Word count:** 3420

26  
27  
28  
29  
30  
31  
32  
33 **\*Correspondence and requests for reprint:**

34  
35 Dr. Tao Huang. Department of Epidemiology and Biostatistics, School of Public Health, Peking  
36  
37 University, Beijing, China. Email: [huangtao@bjmu.edu.cn](mailto:huangtao@bjmu.edu.cn)

38  
39 Dr. Lu Qi. Department of Epidemiology, School of Public Health and Tropical Medicine, Tulane  
40  
41 University. 1440 Canal Street, Suite 1724, New Orleans, LA 70112

42  
43 Telephone: 504-988-3549;

44  
45 Email: [lqi1@tulane.edu](mailto:lqi1@tulane.edu); [luqi@hsph.harvard.edu](mailto:luqi@hsph.harvard.edu)  
46  
47  
48  
49  
50  
51  
52  
53  
54  
55  
56  
57  
58  
59  
60

## 1 Abstract

2 **Objective:** We tested whether genetic variants near fatty acid desaturases gene (*FADS*) cluster, which  
3 were recently identified to be signatures of adaptation to fish- and n-3 PUFAs-rich diet, interacted with  
4 these dietary factors on change in body mass index (BMI).

5 **Design:** Three *FADS* variants were examined for gene-diet interactions on long-term (~10 years) changes  
6 in BMI and body weight in four prospective cohort studies.

7 **Setting:** Population based study

8 **Participants:** 11,323 women from the Nurses' Health Study (NHS), 6,833 men from the Health  
9 Professionals Follow-up Study (HPFS), and replicated in 6,254 women from the Women's Health  
10 Initiative (WHI), and 5,264 Chinese from the Singapore Chinese Health Study (SCHS).

11 **Main outcomes:** Long-term (~10 years) changes in BMI and body weight

12 **Results:** In the NHS and HPFS cohorts, food-sourced n-3 PUFAs intake showed interactions with the  
13 *FADS* rs174570 on changes of BMI (P for interaction = 0.02 in NHS, 0.05 in HPFS, and 0.007 in  
14 combined). Such interactions were replicated in two independent cohorts WHI and SCHS (P for  
15 interaction = 0.04 in WHI, 0.02 in SCHS, and 0.001 in combined). The genetic associations of the *FADS*  
16 rs174570 with changes in BMI increased across the tertiles of n-3 PUFAs in all the cohorts. Fish intake  
17 also accentuated the genetic associations of the *FADS* rs174570 with long-term changes in BMI (pooled P  
18 for interaction = 0.006). Viewed differently, long chain n-3 PUFAs intake showed stronger association  
19 with long-term changes in BMI among the rs174570 T carriers (beta = 0.79 kg/m<sup>2</sup> per g, P = 3×10<sup>-5</sup>) than  
20 the rs174570 non-T carriers (beta=0.16 kg/m<sup>2</sup> per g, P = 0.08). Similar results were observed for fish  
21 intake.

22 **Conclusions:** Our hypothesis-driven analyses provide replicable evidence that long chain n-3 PUFAs and  
23 fish intakes may interact with the *FADS* variant on long-term weight gain. Further investigation is needed  
24 to confirm our findings in other cohorts.

25

1  
2  
3 27 **Article summary**  
4

5 28 **Strengths and limitations of this study**  
6

- 7 29 ● This is the first study with consistent results from 4 well-established prospective cohorts of different  
8 racial populations such as Caucasians and Singapore Chinese. The consistent results from these  
9 independent cohorts demonstrated the robustness of our findings.  
10  
11 30  
12 31  
13 32 ● Other major strengths include the prospective design, the large sample size, use of long-term change  
14 of BMI, and replication of the results.  
15  
16 33  
17 34 ● Dietary fatty acids, fish, and adiposity measures were self-reported, measurement errors in these  
18 variables are inevitable.  
19  
20 35  
21 36 ● Confounding by other unmeasured or unknown factors might exist, although we have carefully  
22 adjusted for multiple dietary and lifestyle factors.  
23  
24 37  
25 38 ● We acknowledge that the different methods in measuring anthropometric traits, genetic variants and  
26 food intake across cohorts might introduce bias in the present analyses.  
27  
28 39  
29  
30  
31 40  
32  
33  
34  
35  
36  
37  
38  
39  
40  
41  
42  
43  
44  
45  
46  
47  
48  
49  
50  
51  
52  
53  
54  
55  
56  
57  
58  
59  
60

www only

## 42 Introduction

43 Diets rich in fish and marine fatty acids, especially long chain n-3 polyunsaturated fatty acids (PUFAs)  
44 has shown beneficial effects on cardiometabolic health<sup>1 2</sup>. However, data from population studies on the  
45 associations between such diet and body weight are inconsistent<sup>3 4</sup>. Emerging evidence suggests genetic  
46 variations may play a role in modifying the relation between dietary factors and body weight<sup>5-7</sup>. For  
47 example, we previously found that high intakes of fish and long-chain n-3 PUFAs are associated with an  
48 attenuation of the genetic association with long-term weight gain based on results from 3 prospective  
49 cohorts of Caucasians.<sup>8</sup>

50  
51 A recent study of Inuit identified genetic signatures of adaptation to diets rich in fish and n-3 PUFAs<sup>9</sup>.  
52 The strong signals locate in a cluster of fatty acid desaturases genes (*FADS*) that determine PUFAs levels  
53 <sup>9</sup>. People living in the Arctic region have been found to be genetically prone to develop obesity<sup>10 11</sup> as  
54 survival strength for energy storage<sup>12 13</sup>. Interestingly, the identified *FADS* genetic signatures of diet  
55 adaptation have been also related to adiposity in the Inuit population<sup>9</sup>. Of note, due to long-standing  
56 selection pressure, the identified *FADS* signatures differ in frequency of selective allele across various  
57 populations such as Europeans and Asians<sup>14</sup>, in coincidence with varying levels of fish/marine fatty acids  
58 consumption, and adiposity patterns in these populations<sup>15</sup>. We therefore hypothesized that the genetic  
59 signatures might interact with fish and marine PUFAs intakes on body weight<sup>14</sup>.

60  
61 The present study tested the interactions between n-3 PUFAs and fish intakes and variants in *FADS* gene  
62 cluster, genetic signatures of adaptation to fish- and n-3 PUFAs-rich diet, in relation to long-term changes  
63 in body mass index (BMI) in two US prospective cohorts: the Nurses' Health Study (NHS) and the Health  
64 Professionals Follow-up Study (HPFS). We replicated the findings in two independent, prospective  
65 cohorts the Women's Health Initiative (WHI, US) and the Singapore Chinese Health Study (SCHS).

## 67 Methods

## 68 **Discovery cohorts**

### 69 *The Nurses' Health Study*

70 The NHS began in 1976, when 121,700 female registered nurses aged 30-55 y residing in 11 states were  
71 recruited to complete a baseline questionnaire about their lifestyle and medical history<sup>16</sup>. The current  
72 analysis baseline was set in 1990 for the NHS. We included 11,323 women of European ancestry.  
73 Informed consent was obtained from all participants. The DNA extraction methods, quality control  
74 measures, SNPs genotyping and imputation when performed have been described in detail elsewhere<sup>17-23</sup>.  
75 All participants with baseline long chain n-3 PUFAs and fish consumptions and covariates data, baseline  
76 and endpoint BMI data, and genotyping data available based on previous GWASs were included<sup>17-22</sup>. The  
77 study protocol was approved by the institutional review boards of Brigham and Women's Hospital and  
78 Harvard School of Public Health.

### 80 *The Health Professionals Follow-up Study*

81 The HPFS was initiated in 1986, and was composed of 51,529 male dentists, pharmacists, veterinarians,  
82 optometrists, osteopathic physicians, and podiatrists, aged 40-75 y at baseline. The male participants  
83 returned a baseline questionnaire about detailed medical history, lifestyle, and usual diet<sup>24</sup>. In the current  
84 analysis, we used 1990 as baseline in the HPFS, when the earliest complete dietary data were collected.  
85 Our analysis included 6,833 men whose genotype data were available. Informed consent was obtained  
86 from all participants. The DNA extraction methods, quality control measures, SNPs genotyping and  
87 imputation when performed have been described in detail elsewhere<sup>17-23</sup>. All participants with baseline  
88 long chain n-3 PUFAs and fish consumptions and covariates data, baseline and endpoint BMI data, and  
89 genotyping data available based on previous GWASs were included<sup>17-22</sup>. The study protocol was also  
90 approved by the institutional review boards of Brigham and Women's Hospital and Harvard School of  
91 Public Health.

## 93 **Replication cohorts**



1  
2  
3 94 ***The Women's Health Initiative (WHI)***  
4

5 95 The Women's Health Initiative (WHI) is a large, multiethnic, 40-center study funded by the National  
6  
7 96 Heart, Lung, and Blood Institute (NHLBI) that focuses on strategies for preventing heart disease, breast  
8  
9 97 and colorectal cancer, and osteoporotic fractures in postmenopausal women. A full description of the WHI  
10  
11 98 study is presented elsewhere<sup>25 26</sup>. For the analyses, all participants with baseline long chain n-3 PUFAs  
12  
13 99 and fish consumption and covariate data, baseline and endpoint BMI data, and genotyping data available  
14  
15 100 based on previous GWASs were included. Finally, we included 6,254 Caucasians women who  
16  
17 101 participated in the WHI clinical trial studies at baseline (1994-1998) and at sixth-year follow-up and for  
18  
19 102 whom DNA was measured. The genomic DNA samples were processed according to standard Affymetrix  
20  
21 103 procedures for processing of the assay. The Affymetrix Human SNP Array 6.0 (Affymetrix®, Inc Santa  
22  
23 104 Clara, CA) was used for genome wide SNP genotyping. Human subjects review committees at each  
24  
25 105 participating institution reviewed and approved the study, and all women gave written informed consent.  
26  
27  
28  
29

30 107 ***The Singapore Chinese Health Study (SCHS) cohort***  
31

32 108 The design of Singapore Chinese Health Study (SCHS) has been previously described in detail<sup>27</sup>. Briefly,  
33  
34 109 between 1993 and 1998, 63,257 Chinese men and women between ages of 45 and 74 years living in  
35  
36 110 Singapore were enrolled into the cohort study<sup>28</sup>. Two follow-up interviews were conducted via telephone  
37  
38 111 among surviving participants between 1999 and 2004, and again between 2006 and 2010 to update  
39  
40 112 information on body weight, selected lifestyle factors and medical history. All participants have given  
41  
42 113 informed consent. The study was approved by the Institutional Review Boards of the National University  
43  
44 114 of Singapore and the University of Pittsburgh, and the study was carried out in accordance with the  
45  
46 115 approved guidelines. All participants with baseline long chain n-3 PUFAs and fish consumptions and  
47  
48 116 covariates data, baseline and endpoint BMI data available were included. Among these participants,  
49  
50 117 genome-wide genotyping for 2615 incident diabetes cases and 2615 matched controls was performed at  
51  
52 118 the Genome Institute of the Singapore according to the manufacturer's recommendations using an  
53  
54 119 Affymetrix ASI (Asian) Axiom array. Genotype calling was performed by the Affymetrix Corporation<sup>29</sup>.  
55  
56  
57  
58  
59

1  
2  
3 120 Genome-wide genotyping for 717 incident myocardial infarction (MI) cases and 644 controls was  
4  
5 121 performed for SCHS samples using the Illumina HumanOmni ZhongHua-8 Bead Chip<sup>30</sup>. Among these  
6  
7 122 two case-control studies nested within the cohort, 5,264 subjects with genotyping data had weight reported  
8  
9 123 at both baseline and follow-up 2 interviews, and were included in this analysis.  
10

11 124

### 125 **Assessment of measures of body mass index**

126 Height and body weight were assessed by questionnaire at baseline, and weight information was requested  
127 on follow-up questionnaire in all 4 cohorts. Self-reported weights were highly correlated with directly  
128 measured values ( $r=0.97$  in HPFS and NHS) in a validation study<sup>31</sup>. BMI was calculated as body weight  
129 (kg)/height (m<sup>2</sup>). As defined previously,<sup>8</sup> the long-term changes in BMI was calculated as changes in BMI  
130 from 1990 to 2000 in the NHS and HPFS cohorts<sup>32</sup>, and from baseline (1993) to sixth year follow-up in  
131 the WHI<sup>25,26</sup>, and from baseline (1998) to second follow-up (2004) in the SCHS.  
132

133

### 134 **Assessment of diets and other covariates**

135 Questionnaires were used to collect information on a medical history and diet/lifestyle factors in all 4  
136 cohorts. Total fish, n-3 PUFAs, supplemental use of fish oil, alcohol, sugar sweetened beverages, fried  
137 food intakes, and other dietary factors at baseline were assessed by validated food frequency  
138 questionnaires (FFQ) in the NHS and HPFS<sup>33,34</sup>. A 165-item validated semi-quantitative FFQ was used to  
139 collect dietary data and supplemental use of fish oil in the SCHS<sup>28</sup>. Dietary data and supplemental use of  
140 fish oil were obtained from a self-administered baseline 122-items validated FFQ in the WHI<sup>35</sup>. Alternate  
141 health eating index was previously calculated in the NHS, HPFS<sup>36</sup>, WHI, and SCHS. Physical activity  
142 was expressed as metabolic equivalents per week by incorporating the reported time spent on various  
143 activities, and the intensity level of each activity. The validity of the self-reported physical activity data  
144 has been described previously in the NHS and HPFS<sup>37</sup>. In the WHI, an estimated metabolic equivalent  
(MET) level for each type of activity was assigned from a compendium of activities<sup>38</sup>. Physical activity

1  
2  
3 145 was assessed using eight continuous categories ranging from never to 31 hours or more in an average  
4  
5 146 week spent doing strenuous sports; vigorous work; and moderate activities in the SCHS <sup>27</sup>.

6  
7 147

### 9 148 **The *FADS* variants selection and genotyping**

11 149 Three of the 6 *FADS* single-nucleotide polymorphisms (SNPs) reported in a recent scan of Inuit genomes  
12  
13 150 for signatures of adaptation <sup>9</sup> were derived from genome-wide scans available in the NHS, HPFS. We  
14  
15 151 assumed that each SNP in the panel acts independently in an additive manner. We coded the SNPs as  
16  
17 152 following: rs174570 (TT=2, TC=1, CC=0); rs174602 (TT=2, TC=1, CC=0); rs7115739 (TT=2, TG=1,  
18  
19 153 GG=0). The *FADS* rs174570 was extracted from GWAS data in the WHI and SCHS cohorts for  
20  
21 154 replication (**Supplemental Table 1**).

22  
23  
24 155

### 26 156 **Patient and Public Involvement**

27  
28 157 Neither patients nor public were involved.

29  
30  
31 158

### 32 159 **Statistical analyses**

33  
34 160 We examined the associations of the *FADS* variants (rs174570, rs174602, rs7115739) with adiposity  
35  
36 161 measures and long-term changes in BMI using multiple linear regression model. Interactions between the  
37  
38 162 *FADS* variants (rs174570, rs174602, rs7115739) and baseline fish intake, and total or food-sourced long  
39  
40 163 chain n-3 PUFAs intakes on long-term changes in BMI were tested by including a multiplicative  
41  
42 164 interaction term in the models in the NHS and HPFS. The significant results for rs174570 were replicated  
43  
44 165 in the WHI and SCHS. Potential confounders considered in multivariable models were age, baseline  
45  
46 166 physical activity, baseline television watching, baseline smoking, baseline alcohol intake, baseline  
47  
48 167 alternate healthy eating index, and baseline total energy intake, sugar sweetened beverages (if available),  
49  
50 168 fried food intake (if available). We further tested the genetic associations with long-term changes in BMI  
51  
52 169 according to long chain n-3 PUFAs and fish intakes, and associations of long chain n-3 PUFAs and fish

1  
2  
3 170 intakes with long-term changes in BMI according to the *FADS* genotypes using multiple linear regression  
4  
5 171 model after adjustment of potential confounders. Linear trend across categories of long chain n-3 PUFAs  
6  
7 172 and fish intakes was quantified with a Wald test for linear trend by assigning the median value to each  
8  
9  
10 173 category and modeling it as a continuous variable<sup>39</sup>. Results across cohorts were pooled with inverse  
11  
12 174 variance weighted meta-analyses by fixed effects models ( $P \geq 0.05$  for heterogeneity between studies)<sup>40</sup>.  
13  
14 175 The individual participant data from the NHS and HPFS cohorts were pooled to generate the predicted  
15  
16 176 10-year changes in body weight according to the *FADS* genotypes. Hardy-Weinberg equilibrium was  
17  
18 177 tested using Chi-square test. All reported P values are nominal and two sided. Statistical analyses were  
19  
20  
21 178 performed in SAS 9.3 (SAS Institute, Cary, NC, USA).  
22

23 179

## 25 180 **Results**

### 27 181 **Baseline characteristics of all participants in the NHS, HPFS, WHI and SCHS cohorts**

29 182 **Table 1** shows the baseline characteristics for all participants in the NHS, HPFS, WHI, and SCHS cohorts.  
30  
31 183 The present study included 11,323 women with genetic data from the NHS cohort, 6,833 men with genetic  
32  
33 184 data from the HPFS cohort, 6,254 women from the WHI, and 5,264 Chinese from the SCHS. The  
34  
35 185 distribution of the *FADS* genetic variants in the 4 cohorts is shown in **Supplemental table 1**. Chi-square  
36  
37 186 test showed that the *FADS* rs174570 is in Hardy-Weinberg equilibrium. We did not observe any  
38  
39 187 significant genetic association between the *FADS* rs174570 genotype and baseline BMI, and long-term  
40  
41 188 changes in BMI in the three US cohorts ( $P > 0.05$ ). However, we found that the *FADS* genotype was  
42  
43 189 significantly associated with baseline BMI in the SCHS ( $P = 0.002$ ) (**Supplemental table 2**).  
44

46 190

### 48 191 **Genetic associations with long-term changes in BMI according to LC n-3 PUFAs/fish intakes**

50 192 We first tested interactions between the *FADS* genetic variants (rs174570, rs174602, rs7115739) and  
51  
52 193 intakes of variously sourced long chain n-3 PUFAs and fish in the NHS and HPFS cohorts. We found that  
53  
54 194 only *FADS* rs174570 (C/T, with T as the common allele in Inuit, but rare allele in Europeans and Asians)  
55  
56  
57  
58  
59

1  
2  
3 195 showed significant interaction with LC n-3 PUFAs/fish intakes. Food-sourced n-3 PUFAs  
4  
5 196 (Eicosapentaenoic acid (EPA) + Docosahexaenoic acid (DHA)) intake consistently magnified the genetic  
6  
7 197 association with long-term changes in BMI (P for interaction = 0.02 in NHS, 0.05 in HPFS, and 0.007 in  
8  
9 198 combined cohorts) (**Figure 1**). We successfully replicated our results in the WHI cohort (P for interaction  
10  
11 199 = 0.04) and the SCHS cohort (P for interaction = 0.02).

12  
13  
14 200  
15  
16 201 The pooled analyses of the 3 US (Caucasian) samples or all 4 cohorts showed that high intakes of  
17  
18 202 food-sourced n-3 PUFAs intake (P for interaction = 0.008 and 0.009, respectively) significantly  
19  
20 203 accentuated the genetic association of the *FADS* genotypes with long-term changes in BMI (**Figure 2**). No  
21  
22 204 significant heterogeneity in the interaction effect was observed among these cohorts. Differences in  
23  
24 205 long-term changes of BMI per T allele were -0.105 (SE 0.067), 0.027 (SE 0.064), and 0.120 (SE 0.067)  
25  
26 206 kg/m<sup>2</sup> across three tertiles of food-sourced n-3 PUFAs in pooled results from all the 4 cohorts.

27  
28 207  
29  
30 208 Individual food-sourced n-3 PUFAs such as EPA (pooled P for interaction=0.01) and DHA (pooled P for  
31  
32 209 interaction=0.003) showed similar interaction patterns; and the interactions remained significant when  
33  
34 210 supplemented n-3 PUFAs were considered (pooled P for interaction=0.007) (**Figure 2**).

35  
36 211  
37  
38 212 In addition, fish intake showed similar, though less significant, interaction patterns with the *FADS*  
39  
40 213 genotype on long-term changes in BMI in the NHS (P for interaction=0.16), HPFS (P for  
41  
42 214 interaction=0.09), WHI (P for interaction=0.09), SCHS (P for interaction=0.03) and combined results  
43  
44 215 (pooled P for interaction=0.006), and the differences in BMI changes per T allele were -0.096 (SE 0.071),  
45  
46 216 0.041 (SE 0.052), and 0.251 (SE 0.151) kg/m<sup>2</sup> across three categories ( $\leq 1$  serving/week, 1~6  
47  
48 217 servings/week, and  $\geq 1$  serving/day) of fish intake in combined results from all the 4 cohorts.

49  
50 218  
51  
52 219 In addition, we did not observe significant interaction between two other genetic variants in *FADS* cluster  
53  
54 220 (rs174602 and rs7115739) and long chain n-3 PUFAs/fish intakes in relation to long-term changes in BMI

1  
2  
3 221 in the NHS and HPFS cohorts. Similar interactions for long-term changes in body weight were observed  
4  
5 222 (Supplemental table 3 & 4).

6  
7 223  
8  
9 224 **Long chain n-3 PUFAs/fish intakes and long-term changes in BMI according to the *FADS* genotype**

10  
11 225 We found that individuals who consumed the highest food-sourced n-3 PUFAs (EPA+DHA; T3) had  
12  
13 226 significantly greater increase of BMI (mean  $\pm$  SE = 0.74 $\pm$ 0.06, kg/m<sup>2</sup>) than did those who consumed the  
14  
15 227 lowest (T1) (mean  $\pm$  SE = 0.39 $\pm$ 0.07, kg/m<sup>2</sup>) among the T allele carriers, whereas the corresponding BMI  
16  
17 228 changes were 0.68 $\pm$ 0.03 kg/m<sup>2</sup> and 0.49 $\pm$ 0.03 kg/m<sup>2</sup>, respectively, among the non-T carriers in 4 cohorts  
18  
19 229 combined (Table 2 & Supplemental table 5). Similarly, we observed different associations between fish  
20  
21 230 intake and BMI changes among the T allele carriers ( $P = 1.5 \times 10^{-6}$ ) and non-carriers ( $P = 0.01$ ) in the  
22  
23 231 pooled results from these US cohorts. No significant heterogeneity in the interaction effect was observed  
24  
25 232 among the cohorts.  
26  
27 233

28  
29  
30 234 **Figure 3** presents the predicted long-term changes in BMI from food-sourced n-3 PUFAs and fish intake  
31  
32 235 according to the T carriers and the non-T carriers. Results from the NHS, HPFS and WHI cohorts  
33  
34 236 consistently showed that the associations of food-sourced n-3 PUFAs and fish intakes with long-term  
35  
36 237 changes in BMI were stronger among the T carriers than those among the non-T carriers. In the pooled  
37  
38 238 results, the beta  $\pm$  SE for associations of food-sourced n-3 PUFAs (**Figure 3**) and fish intake (**Figure 4**)  
39  
40 239 with long-term changes in BMI were 0.79  $\pm$  0.19 kg/m<sup>2</sup> per g ( $P = 0.000003$ ) and 0.64  $\pm$  0.16 kg/m<sup>2</sup> per  
41  
42 240 serving ( $P = 0.00002$ ) among the T carriers, and whereas the corresponding beta  $\pm$  SE were 0.16  $\pm$  0.10  
43  
44 241 kg/m<sup>2</sup> per g ( $P = 0.08$ ) and 0.18  $\pm$  0.08 kg/m<sup>2</sup> per serving ( $P = 0.01$ ) among the non-T carriers.  
45  
46 242

## 47 243 **Discussion**

48  
49  
50 244 In 4 large prospective cohorts of the US and Chinese populations, our hypothesis-driven analyses showed  
51  
52 245 reproducible evidence that long chain n-3 PUFAs and fish intakes accentuated the genetic association of  
53  
54 246 the *FADS* genotypes with long-term changes in BMI. In addition, our results showed that the *FADS*

1  
2  
3 247 rs174570 T allele carriers gained more weight than the non-carriers when they had higher long chain n-3  
4  
5 248 PUFAs and fish intakes.

6  
7 249  
8  
9 250 Large prospective cohort studies examining the associations of fish or n-3 PUFAs with body weight  
10  
11 251 and obesity risk have generated conflicting results<sup>3,4</sup>. In addition, several randomized controlled trials  
12  
13 252 (RCTs) supported the protective effects of fish, fish oils, or/and n-3 PUFAs intake on weight-loss<sup>41-43</sup>, but  
14  
15 253 the benefit was not evident in other trials<sup>44-46</sup>. The results from the current study lend support to our  
16  
17 254 hypothesis that the heterogeneous associations between fish or n-3 PUFAs and body weight might be at  
18  
19 255 least partly due to gene-diet interactions.

20  
21  
22 256  
23  
24 257 We found that the genetic associations between the *FADS* rs174570 and long-term BMI change were  
25  
26 258 stronger along with increasing intakes of long chain n-3 PUFAs and fish. Viewed from a different angle,  
27  
28 259 the magnitude of associations of fish and long chain n-3 PUFAs intakes with BMI changes varied among  
29  
30 260 individuals with different genotypes. The *FADS* rs174570 was recently identified from a study of the  
31  
32 261 Inuit, who had high fish/n-3 PUFAs intakes<sup>9</sup>. The high frequency of the T allele in Inuit reflects genetic  
33  
34 262 adaptation to the special fish- and n-3 PUFA rich diet. Interestingly, the identified *FADS* genetic  
35  
36 263 signatures of diet adaptation have been also related to adiposity in this population. Our data indicated that  
37  
38 264 the signature allele (T) was related differently to weight changes (decrease or increase), depending on  
39  
40 265 the levels of fish/n-3 PUFAs intakes. In people with high fish/n-3 PUFAs intakes, carrying the signature  
41  
42 266 allele predisposed to greater weight gain and an increased risk of obesity; while carriers of this allele  
43  
44 267 tended to have less body weight when they are exposed to a diet low in fish and n-3 PUFAs.

45  
46 268  
47  
48  
49 269 We found that individual food-sourced n-3 PUFAs such as EPA and DHA showed similar interaction  
50  
51 270 patterns in relation to long-term changes in BMI; and the interactions also remained significant when  
52  
53 271 supplemented n-3 PUFAs were considered. In addition, our results indicated that the interactions of  
54  
55 272 fish/n-3 PUFAs intakes and the *FADS* genotype were persistent across different racial populations such as  
56  
57  
58  
59  
60

1  
2  
3 273 Europeans and Asians. Our data suggest that the interactions between n-3 PUFAs and the *FADS* genotype  
4  
5 274 is robust for fatty acids from various sources.  
6

7 275  
8  
9 276 The mechanisms underlying the observed gene-diet interactions remain unclear. However, such  
10  
11 277 interactions are biologically plausible. It has long been known that the *FADS* genes such as  
12  
13 278 *FADS1* and *FADS2* encode delta-5 and delta-6 desaturases respectively, which are the important  
14  
15 279 rate-limiting steps in the endogenous formation of long-chain PUFA such as EPA and DHA from linoleic  
16  
17 280 acid (n-6) and  $\alpha$ -linolenic acid (n-3)<sup>47</sup>. The selected allele of *FADS* rs174570 is significantly associated  
18  
19 281 with an increase in the concentration of n-3 fatty acids upstream in the n-3 synthesis pathway<sup>47</sup>. Further, it  
20  
21 282 has been reported that dietary n-3 PUFAs might regulate adipocyte *FADS* expression and function<sup>48</sup>. In  
22  
23 283 addition, storage of energy and body fat is very important for the Arctic population, who are regularly  
24  
25 284 exposed to extremely low temperatures and fishes rich in n-3 PUFAs<sup>12 13</sup>. Under natural selection,  
26  
27 285 these people are genetically prone to high fish intake to keep body fat<sup>10 11</sup>. Therefore, it's not surprising  
28  
29 286 that high fish or n-3 PUFAs intake accentuated genetic susceptibility to obesity among people carrying  
30  
31 287 selective *FADS* signature<sup>49 50</sup>. Our findings support the view that extra n-3 PUFAs may not have much  
32  
33 288 benefit for Europeans with selective *FADS* signature<sup>9 14</sup>.  
34  
35

### 36 289 **Strengths**

37  
38  
39 290 Several strengths of this study merit mention. To our knowledge, this is the first study with consistent  
40  
41 291 results from 4 well-established prospective cohorts of different racial populations such as Caucasians and  
42  
43 292 Singapore Chinese. The consistent results from these independent cohorts demonstrated the robustness of  
44  
45 293 our findings. Other major strengths include the prospective design, the large sample size, use of long-term  
46  
47 294 change of BMI, and replication of the results. Although we prospectively analyzed the data, we cannot  
48  
49 295 exclude the possibility of reverse causality as this is a study on dietary intake and BMI or weight change  
50  
51 296 from the baseline, which by default builds in the starting point (i.e. the cross sectional association).  
52  
53

### 54 297 **Limitations**



1  
2  
3 298 However, several limitations need to be acknowledged. First, dietary fatty acids, fish, and adiposity  
4  
5 299 measures were self-reported, measurement errors in these variables are inevitable. Despite this, the food  
6  
7 300 frequency questionnaires and adiposity measures data have been well validated<sup>28 31 33-35</sup>. Second,  
8  
9 301 confounding by other unmeasured or unknown factors might exist, although we have carefully adjusted  
10  
11 302 for multiple dietary and lifestyle factors. Third, a causal relation among long chain n-3 PUFAs and fish  
12  
13 303 consumption, and adiposity cannot be inferred from an observational study. Fourth, all subjects with  
14  
15 304 genetic data were selected in each cohort. The source of genotyping data was diverse (e.g. sub-cohort,  
16  
17 305 case control studies), therefore, subject selection might be a major source of bias. Fifth, we acknowledge  
18  
19 306 that the different methods in measuring anthropometric traits, genetic variants and food intake across  
20  
21 307 cohorts might introduce bias in the present analyses. Finally, the participants included in our study were  
22  
23 308 middle aged and older adults of Caucasians in the US and Chinese in Singapore, and it is unknown  
24  
25 309 whether our findings could be generalized to other demographic or ethnic groups.  
26  
27

## 28 310 **Conclusions**

29  
30 311 In summary, our data provide reproducible evidence from 4 multiethnic cohorts that high long chain n-3  
31  
32 312 PUFAs and fish intakes accentuate the genetic association of the *FADS* with adiposity. These findings  
33  
34 313 emphasize the importance of considering precision nutritional interventions on prevention and treatment  
35  
36 314 of obesity. We acknowledge that these results are hypothesis-generating and need to be confirmed in  
37  
38 315 additional cohorts.  
39  
40

41 316  
42  
43 317 **Contributors:** TH and LQ designed the study and wrote the first draft. TH analyzed the data. FBH  
44  
45 318 provided statistical expertise. TW, YH, DS, CSF, JW, LRP, AT, GC, IDV, HKC, JF, XS, CCK, YF, RM,  
46  
47 319 HCK, JY, KWP, and LQ were involved in data collection. TH and LQ are guarantors. All authors  
48  
49 320 contributed to the interpretation of the results and critical revision of the manuscript for important  
50  
51 321 intellectual content and approved the final version of the manuscript.  
52  
53 322 We acknowledge Dr. Gary C. Curhan's contribution to the genetic data.  
54  
55

56 323  
57  
58  
59  
60

**Funding**

This study was supported by grants HL126024, HL034594, DK100383, DK091718, HL071981, HL073168, CA87969, CA49449, CA055075, HL34594, HL088521, U01HG004399, DK080140, P30DK46200, U01CA137088, U54CA155626, DK58845, DK098311, U01HG004728, EY015473, CA134958, DK70756 and DK46200 from the National Institutes of Health, with additional support for genotyping from Merck Research Laboratories, North Wales, PA. LQ is a recipient of the American Heart Association Scientist Development Award (0730094N). LRP is supported by the Arthur Ashley Williams Foundation and a Harvard Ophthalmology Scholar Award (Harvard Medical School) from the Harvard Glaucoma Center of Excellence. ATC is a Damon Runyon Cancer Foundation Clinical Investigator. The SCHS study is supported by the National Institutes of Health, USA (NCI R01 CA144034, UM1 CA182876, R01 DK080720), the Singapore National Medical Research Council (NMRC 1270/2010), the HUI-CREATE Programme of the National Research Foundation, Singapore (Project Number 370062002) and Biomedical Research Council, Singapore. The funding sources had no role in the design or conduct of the study; collection, management, analysis, and interpretation of the data; or preparation, review, or approval of the manuscript.

**Declaration of interests:** All authors have no conflict of interest to declare. No support from any organization for the submitted work; no financial relationships with any organizations that might have an interest in the submitted work in the previous three years, no other relationship or activity that could appear to have influenced the submitted work.

344

345

**Data sharing**

Data are available in Harvard school of public health, NHS and HPFS cohorts. All data relevant to the study are included in the article or uploaded as supplementary information.

## References

1. Del Gobbo LC, Imamura F, Aslibekyan S, Marklund M, Virtanen JK, Wennberg M, et al. omega-3 Polyunsaturated Fatty Acid Biomarkers and Coronary Heart Disease: Pooling Project of 19 Cohort Studies. *JAMA internal medicine* 2016;176(8):1155-66.
2. Hu FB, Bronner L, Willett WC, Stampfer MJ, Rexrode KM, Albert CM, et al. Fish and omega-3 fatty acid intake and risk of coronary heart disease in women. *Jama* 2002;287(14):1815-21.
3. He K, Rimm EB, Merchant A, Rosner BA, Stampfer MJ, Willett WC, et al. Fish consumption and risk of stroke in men. *Jama* 2002;288(24):3130-6.
4. Iso H, Rexrode KM, Stampfer MJ, Manson JE, Colditz GA, Speizer FE, et al. Intake of fish and omega-3 fatty acids and risk of stroke in women. *Jama* 2001;285(3):304-12.
5. Qi L, Cho YA. Gene-environment interaction and obesity. *Nutrition reviews* 2008;66(12):684-94.
6. Qi Q, Chu AY, Kang JH, Huang J, Rose LM, Jensen MK, et al. Fried food consumption, genetic risk, and body mass index: gene-diet interaction analysis in three US cohort studies. *BMJ* 2014;348:g1610.
7. Qi Q, Chu AY, Kang JH, Jensen MK, Curhan GC, Pasquale LR, et al. Sugar-sweetened beverages and genetic risk of obesity. *The New England journal of medicine* 2012;367(15):1387-96.
8. Huang T, Wang T, Heianza Y, Zheng Y, Sun D, Kang JH, et al. Habitual consumption of long-chain n-3 PUFAs and fish attenuates genetically associated long-term weight gain. *The American journal of clinical nutrition* 2019;109(3):665-73.
9. Fumagalli M, Moltke I, Grarup N, Racimo F, Bjerregaard P, Jorgensen ME, et al. Greenlandic Inuit show genetic signatures of diet and climate adaptation. *Science* 2015;349(6254):1343-7.
10. Hegele RA, Anderson C, Young TK, Connelly PW. G-protein beta3 subunit gene splice variant and body fat distribution in Nunavut Inuit. *Genome research* 1999;9(10):972-7.
11. Hegele RA, Huff MW, Young TK. Common genomic variation in LMNA modulates indexes of obesity in Inuit. *The Journal of clinical endocrinology and metabolism* 2001;86(6):2747-51.
12. Jorgensen ME, Bjerregaard P, Borch-Johnsen K. Diabetes and impaired glucose tolerance among the inuit population of Greenland. *Diabetes Care* 2002;25(10):1766-71.
13. Jorgensen ME, Glumer C, Bjerregaard P, Gyntelberg F, Jorgensen T, Borch-Johnsen K. Obesity and central fat pattern among Greenland Inuit and a general population of Denmark (Inter99): relationship to metabolic risk factors. *International journal of obesity and related metabolic disorders : journal of the International Association for the Study of Obesity* 2003;27(12):1507-15.
14. Tishkoff S. GENETICS. Strength in small numbers. *Science* 2015;349(6254):1282-3.
15. Dewailly E, Blanchet C, Lemieux S, Sauve L, Gingras S, Ayotte P, et al. n-3 Fatty acids and cardiovascular disease risk factors among the Inuit of Nunavik. *The American journal of clinical nutrition* 2001;74(4):464-73.
16. Colditz GA, Manson JE, Hankinson SE. The Nurses' Health Study: 20-year contribution to the understanding of health among women. *Journal of women's health / the official publication of the Society for the Advancement of Women's Health Research* 1997;6(1):49-62.
17. Cornelis MC, Monda KL, Yu K, Paynter N, Azzato EM, Bennett SN, et al. Genome-wide meta-analysis identifies regions on 7p21 (AHR) and 15q24 (CYP1A2) as determinants of habitual caffeine consumption. *PLoS genetics* 2011;7(4):e1002033.
18. Jensen MK, Pers TH, Dworzynski P, Girman CJ, Brunak S, Rimm EB. Protein interaction-based genome-wide analysis of incident coronary heart disease. *Circulation. Cardiovascular genetics* 2011;4(5):549-56.
19. Wiggs JL, Kang JH, Yaspan BL, Mirel DB, Laurie C, Crenshaw A, et al. Common variants near CAV1 and CAV2 are associated with primary open-angle glaucoma in Caucasians from the USA. *Human molecular genetics* 2011;20(23):4707-13.
20. Hunter DJ, Kraft P, Jacobs KB, Cox DG, Yeager M, Hankinson SE, et al. A genome-wide association study identifies alleles in FGFR2 associated with risk of sporadic postmenopausal breast cancer. *Nature genetics* 2007;39(7):870-4.
21. Qi L, Cornelis MC, Kraft P, Stanya KJ, Linda Kao WH, Pankow JS, et al. Genetic variants at 2q24 are associated with susceptibility to type 2 diabetes. *Hum Mol Genet* 2010;19(13):2706-15.
22. Kottgen A, Albrecht E, Teumer A, Vitart V, Krumsiek J, Hundertmark C, et al. Genome-wide association analyses identify 18 new loci associated with serum urate concentrations. *Nature genetics* 2013;45(2):145-54.
23. Peters U, Jiao S, Schumacher FR, Hutter CM, Aragaki AK, Baron JA, et al. Identification of Genetic Susceptibility

- 1  
2  
3 Loci for Colorectal Tumors in a Genome-Wide Meta-analysis. *Gastroenterology* 2013;144(4):799-807 e24.
- 4 24. Rimm EB, Giovannucci EL, Willett WC, Colditz GA, Ascherio A, Rosner B, et al. Prospective study of alcohol  
5 consumption and risk of coronary disease in men. *Lancet* 1991;338(8765):464-8.
- 6 25. Anderson GL, Manson J, Wallace R, Lund B, Hall D, Davis S, et al. Implementation of the Women's Health  
7 Initiative study design. *Annals of epidemiology* 2003;13(9 Suppl):S5-17.
- 8 26. Design of the Women's Health Initiative clinical trial and observational study. The Women's Health Initiative  
9 Study Group. *Controlled clinical trials* 1998;19(1):61-109.
- 10 27. Yuan JM, Stram DO, Arakawa K, Lee HP, Yu MC. Dietary cryptoxanthin and reduced risk of lung cancer: the  
11 Singapore Chinese Health Study. *Cancer epidemiology, biomarkers & prevention : a publication of the*  
12 *American Association for Cancer Research, cosponsored by the American Society of Preventive Oncology*  
13 2003;12(9):890-8.
- 14 28. Hankin JH, Stram DO, Arakawa K, Park S, Low SH, Lee HP, et al. Singapore Chinese Health Study: development,  
15 validation, and calibration of the quantitative food frequency questionnaire. *Nutrition and cancer*  
16 2001;39(2):187-95.
- 17 29. Chen Z, Pereira MA, Seielstad M, Koh WP, Tai ES, Teo YY, et al. Joint effects of known type 2 diabetes  
18 susceptibility loci in genome-wide association study of Singapore Chinese: the Singapore Chinese health  
19 study. *PLoS one* 2014;9(2):e87762.
- 20 30. Dorajoo R, Sun Y, Han Y, Ke T, Burger A, Chang X, et al. A genome-wide association study of n-3 and n-6 plasma  
21 fatty acids in a Singaporean Chinese population. *Genes & nutrition* 2015;10(6):53.
- 22 31. Rimm EB, Stampfer MJ, Colditz GA, Chute CG, Litin LB, Willett WC. Validity of self-reported waist and hip  
23 circumferences in men and women. *Epidemiology* 1990;1(6):466-73.
- 24 32. Huang T, Zheng Y, Qi Q, Xu M, Ley SH, Li Y, et al. DNA methylation variants at HIF3A locus, B vitamins intake, and  
25 long-term weight change: gene-diet interactions in two US cohorts. *Diabetes* 2015.
- 26 33. Willett WC, Sampson L, Stampfer MJ, Rosner B, Bain C, Witschi J, et al. Reproducibility and validity of a  
27 semiquantitative food frequency questionnaire. *Am J Epidemiol* 1985;122(1):51-65.
- 28 34. Rimm EB, Giovannucci EL, Stampfer MJ, Colditz GA, Litin LB, Willett WC. Reproducibility and validity of an  
29 expanded self-administered semiquantitative food frequency questionnaire among male health  
30 professionals. *Am J Epidemiol* 1992;135(10):1114-26; discussion 27-36.
- 31 35. Patterson RE, Kristal AR, Tinker LF, Carter RA, Bolton MP, Agurs-Collins T. Measurement characteristics of the  
32 Women's Health Initiative food frequency questionnaire. *Annals of epidemiology* 1999;9(3):178-87.
- 33 36. Chiuve SE, Fung TT, Rimm EB, Hu FB, McCullough ML, Wang M, et al. Alternative dietary indices both strongly  
34 predict risk of chronic disease. *The Journal of nutrition* 2012;142(6):1009-18.
- 35 37. Wolf AM, Hunter DJ, Colditz GA, Manson JE, Stampfer MJ, Corsano KA, et al. Reproducibility and validity of a  
36 self-administered physical activity questionnaire. *Int J Epidemiol* 1994;23(5):991-9.
- 37 38. Langer RD, White E, Lewis CE, Kotchen JM, Hendrix SL, Trevisan M. The Women's Health Initiative Observational  
38 Study: baseline characteristics of participants and reliability of baseline measures. *Annals of epidemiology*  
39 2003;13(9 Suppl):S107-21.
- 40 39. Li Y, Hruby A, Bernstein AM, Ley SH, Wang DD, Chiuve SE, et al. Saturated Fats Compared With Unsaturated Fats  
41 and Sources of Carbohydrates in Relation to Risk of Coronary Heart Disease: A Prospective Cohort Study.  
42 *Journal of the American College of Cardiology* 2015;66(14):1538-48.
- 43 40. Higgins JP, Thompson SG. Quantifying heterogeneity in a meta-analysis. *Statistics in medicine*  
44 2002;21(11):1539-58.
- 45 41. Kabir M, Skurnik G, Naour N, Pechtner V, Meugnier E, Rome S, et al. Treatment for 2 mo with n 3  
46 polyunsaturated fatty acids reduces adiposity and some atherogenic factors but does not improve insulin  
47 sensitivity in women with type 2 diabetes: a randomized controlled study. *The American journal of clinical*  
48 *nutrition* 2007;86(6):1670-9.
- 49 42. Munro IA, Garg ML. Prior supplementation with long chain omega-3 polyunsaturated fatty acids promotes  
50 weight loss in obese adults: a double-blinded randomised controlled trial. *Food & function*  
51 2013;4(4):650-8.
- 52 43. Thorsdottir I, Tomasson H, Gunnarsdottir I, Gisladdottir E, Kiely M, Parra MD, et al. Randomized trial of  
53 weight-loss-diets for young adults varying in fish and fish oil content. *Int J Obes (Lond)* 2007;31(10):1560-6.
- 54 44. Munro IA, Garg ML. Dietary supplementation with n-3 PUFA does not promote weight loss when combined with  
55 a very-low-energy diet. *The British journal of nutrition* 2012;108(8):1466-74.
- 56  
57  
58  
59  
60

- 1  
2  
3 45. Crochemore IC, Souza AF, de Souza AC, Rosado EL. omega-3 polyunsaturated fatty acid supplementation does  
4 not influence body composition, insulin resistance, and lipemia in women with type 2 diabetes and obesity.  
5 *Nutrition in clinical practice : official publication of the American Society for Parenteral and Enteral*  
6 *Nutrition* 2012;27(4):553-60.
- 7 46. Bender N, Portmann M, Heg Z, Hofmann K, Zwahlen M, Egger M. Fish or n3-PUFA intake and body composition:  
8 a systematic review and meta-analysis. *Obesity reviews : an official journal of the International Association*  
9 *for the Study of Obesity* 2014;15(8):657-65.
- 10 47. Ameer A, Enroth S, Johansson A, Zabolli G, Igl W, Johansson AC, et al. Genetic adaptation of fatty-acid  
11 metabolism: a human-specific haplotype increasing the biosynthesis of long-chain omega-3 and omega-6  
12 fatty acids. *Am J Hum Genet* 2012;90(5):809-20.
- 13 48. Ralston JC, Matravadia S, Gaudio N, Holloway GP, Mutch DM. Polyunsaturated fatty acid regulation of adipocyte  
14 FADS1 and FADS2 expression and function. *Obesity (Silver Spring)* 2015;23(4):725-8.
- 15 49. Smith GI, Julliand S, Reeds DN, Sinacore DR, Klein S, Mittendorfer B. Fish oil-derived n-3 PUFA therapy increases  
16 muscle mass and function in healthy older adults. *The American journal of clinical nutrition*  
17 2015;102(1):115-22.
- 18 50. Jourdan C, Kloiber S, Nieters A, Seiler H, Himmerich H, Kohli MA, et al. Gene-PUFA interactions and obesity risk.  
19 *The British journal of nutrition* 2011;106(8):1263-72.  
20  
21  
22  
23  
24  
25  
26  
27  
28  
29  
30  
31  
32  
33  
34  
35  
36  
37  
38  
39  
40  
41  
42  
43  
44  
45  
46  
47  
48  
49  
50  
51  
52  
53  
54  
55  
56  
57  
58  
59  
60

**Table 1 Baseline characteristics of all participants in the NHS, HPFS, WHI, and SCHS cohorts.**

|                                                | NHS <sup>1</sup> | HPFS          | WHI          | SCHS                     |
|------------------------------------------------|------------------|---------------|--------------|--------------------------|
|                                                | n=11,323         | n=6,833       | n=6,254      | n=5,264                  |
| Age (year)                                     | 57 ± 9           | 57 ± 11       | 68 ± 5       | 56 ± 7                   |
| Female (%)                                     | 100              | 0             | 100          | 58.7                     |
| Body weight (kg)                               | 70.1 ± 14.9      | 82.8 ± 12.5   | 73.7 ± 15.0  | 60.3 ± 9.8               |
| Body mass index (kg/m <sup>2</sup> )           | 26.2 ± 5.1       | 25.9 ± 3.3    | 28.3 ± 5.5   | 23.4 ± 3.3               |
| Alcohol consumption (g/day)                    | 5.14 ± 9.23      | 10.97 ± 15.05 | 6.00 ± 11.96 | 1.97 ± 8.02              |
| Physical activity (MET-h/week)                 | 19.3 ± 22.1      | 36.9 ± 39.5   | 11.6 ± 13.1  | 0.5 ± 1.0 <sup>2</sup>   |
| Television watching (h/week)                   | 17.5 ± 14.8      | 10.5 ± 8.2    | /            | 2.2 ± 0.8                |
| Current smokers (n, (%))                       | 1557(13.8)       | 493(7.3)      | 407(15.0)    | 1364(20.0)               |
| Total energy intake (kcal/day)                 | 1766 ± 502       | 1949 ± 578    | 1602 ± 654   | 1606 ± 573               |
| Alternative health eating index score          | 53.4 ± 10.8      | 53.8 ± 11.4   | 53.5 ± 10.6  | 55.8 ± 8.2               |
| Sugar sweetened beverage intake (servings/day) | 0.13 ± 0.39      | 0.23 ± 0.48   | 0.39 ± 0.82  | 0.69 ± 2.40 <sup>3</sup> |
| Total fried food (servings/day)                | 0.12 ± 0.20      | 0.22 ± 0.28   | /            | /                        |
| Fish intake (servings/day)                     | 0.31 ± 0.29      | 0.33 ± 0.30   | 0.23 ± 0.20  | 0.16 ± 0.07              |
| Food-sourced EPA (g/day)                       | 0.08 ± 0.14      | 0.12 ± 0.20   | 0.04 ± 0.04  | /                        |
| Food-sourced DHA (g/day)                       | 0.17 ± 0.14      | 0.22 ± 0.19   | 0.07 ± 0.07  | /                        |
| Food-sourced EPA+DHA (g/day)                   | 0.23 ± 0.19      | 0.31 ± 0.25   | 0.11 ± 0.10  | 0.33 ± 0.20              |
| Total EPA+DHA (g/day)                          | 0.26 ± 0.27      | 0.35 ± 0.37   | 0.38 ± 0.48  | /                        |

<sup>1</sup>Plus-minus values are means ± SD. <sup>2</sup>Hours per week of moderate activity in the SCHS. <sup>3</sup>Glasses per week of soda intake in the SCHS.

EPA: 20:5n-3; DHA: 22:6n-3; MET denotes metabolic equivalents. Total EPA+DHA includes food-sourced and supplemental EPA+DHA.

Data on BMI, long chain n-3 PUFAs and fish consumptions were assessed at baseline in the NHS (1990), the HPFS (1990), the WHI (1994-1998), and the SCHS (1993-1998), respectively. Television watching assessed in 1992 for NHS and in 1990 for HPFS.

**Table 2 Associations of long chain n-3 PUFAs and fish intakes with long-term changes in BMI according to *FADS* genotypes**

| <i>FADS</i> genotypes              |                | Three categories of long chain n-3 PUFAs and fish intakes |            |            | P for trend          | P for interaction* |
|------------------------------------|----------------|-----------------------------------------------------------|------------|------------|----------------------|--------------------|
|                                    |                | ≤1/wk                                                     | 1~6/wk     | ≥1/d       |                      |                    |
| <b>Total fish, serving/day</b>     |                |                                                           |            |            |                      |                    |
| NHS                                | Non-T carriers | 0.82±0.06                                                 | 0.98±0.04  | 1.15±0.13  | 0.006                | 0.03               |
|                                    | T carriers     | 0.73±0.11                                                 | 0.95±0.08  | 1.55±0.25  | 0.0007               |                    |
| HPFS                               | Non-T carriers | 0.43±0.05                                                 | 0.52±0.04  | 0.59±0.12  | 0.73                 | 0.03               |
|                                    | T carriers     | 0.21±0.11                                                 | 0.52±0.07  | 0.79±0.22  | 0.02                 |                    |
| WHI                                | Non-T carriers | 0.11±0.08                                                 | 0.28±0.06  | 0.28±0.34  | 0.04                 | 0.09               |
|                                    | T carriers     | 0.02±0.15                                                 | 0.29±0.11  | 0.94±0.67  | 0.01                 |                    |
| SCHS                               | Non-T carriers | -3.08±0.19                                                | -3.00±0.17 | -3.35±0.18 | 0.32                 | 0.01               |
|                                    | T carriers     | -3.61±0.17                                                | -3.10±0.15 | -3.25±0.17 | 0.13                 |                    |
| Pooled <sup>1</sup>                | Non-T carriers | 0.50±0.03                                                 | 0.67±0.03  | 0.81±0.08  | 0.01                 | 0.0007             |
|                                    | T carriers     | 0.38±0.07                                                 | 0.63±0.05  | 1.11±0.16  | 2×10 <sup>-4</sup>   |                    |
| <b>Food-sourced EPA+DHA, g/day</b> |                | Tertile1                                                  | Tertile2   | Tertile3   |                      |                    |
| NHS                                | Non-T carriers | 0.79±0.06                                                 | 0.92±0.05  | 1.11±0.06  | 0.01                 | 0.005              |
|                                    | T carriers     | 0.71±0.10                                                 | 0.84±0.11  | 1.19±0.11  | 0.0001               |                    |
| HPFS                               | Non-T carriers | 0.46±0.05                                                 | 0.53±0.05  | 0.49±0.05  | 0.79                 | 0.02               |
|                                    | T carriers     | 0.23±0.11                                                 | 0.48±0.10  | 0.58±0.09  | 0.02                 |                    |
| WHI                                | Non-T carriers | 0.02±0.08                                                 | 0.21±0.08  | 0.41±0.08  | 0.06                 | 0.04               |
|                                    | T carriers     | -0.03±0.15                                                | 0.29±0.14  | 0.35±0.15  | 0.004                |                    |
| SCHS                               | Non-T carriers | -3.32±0.17                                                | -3.15±0.18 | -2.99±0.17 | 0.16                 | 0.035              |
|                                    | T carriers     | -3.55±0.16                                                | -3.34±0.16 | -3.05±0.16 | 0.02                 |                    |
| Pooled <sup>1</sup>                | Non-T carriers | 0.49±0.03                                                 | 0.64±0.03  | 0.68±0.03  | 0.01                 | 0.0003             |
|                                    | T carriers     | 0.39±0.07                                                 | 0.57±0.06  | 0.74±0.06  | 1.5×10 <sup>-6</sup> |                    |
| <b>Total EPA+DHA, g/day</b>        |                | Tertile1                                                  | Tertile2   | Tertile3   |                      |                    |

1  
2  
3  
4  
5  
6  
7  
8  
9  
10  
11  
12  
13  
14  
15  
16  
17  
18  
19  
20  
21  
22  
23  
24  
25  
26  
27  
28  
29  
30  
31  
32  
33  
34  
35  
36  
37  
38  
39  
40  
41  
42  
43  
44  
45  
46  
47  
48  
49  
50  
51  
52  
53  
54  
55  
56  
57  
58  
59  
60

|                     |                |           |           |           |      |       |
|---------------------|----------------|-----------|-----------|-----------|------|-------|
| NHS                 | Non-T carriers | 0.79±0.06 | 0.94±0.05 | 1.08±0.06 | 0.8  | 0.01  |
|                     | T carriers     | 0.72±0.11 | 0.87±0.10 | 1.16±0.11 | 0.02 |       |
| HPFS                | Non-T carriers | 0.47±0.05 | 0.53±0.05 | 0.49±0.05 | 0.88 | 0.13  |
|                     | T carriers     | 0.23±0.10 | 0.50±0.09 | 0.57±0.10 | 0.16 |       |
| WHI                 | Non-T carriers | 0.39±0.10 | 0.04±0.08 | 0.23±0.10 | 0.42 | 0.27  |
|                     | T carriers     | 0.04±0.18 | 0.28±0.15 | 0.28±0.16 | 0.84 |       |
| Pooled <sup>1</sup> | Non-T carriers | 0.57±0.04 | 0.62±0.03 | 0.67±0.04 | 0.65 | 0.005 |
|                     | T carriers     | 0.39±0.07 | 0.60±0.06 | 0.74±0.07 | 0.01 |       |

---

Data are means ± SE for long term changes in BMI.

Total EPA+DHA include food-sourced and supplemental EPA+DHA.

<sup>1</sup>P for interaction was generated from dominant model of *FADS* rs174570 (CC vs CT+TT).

Numbers of T carriers/Non-T carriers in the NHS, HPFS, WHI, and SCHS are 1698/9625, 1025/5808, 876/5378, and 1842/3422, respectively.

Data on BMI, long chain n-3 PUFAs and fish consumptions were assessed at baseline in the NHS (1990), the HPFS (1990), the WHI (1994-1998), and the SCHS (1993-1998), respectively.

Data on follow-up BMI was assessed in 2000 in the NHS and HPFS, in the sixth follow-up year in the WHI, and from 2006 to 2010 in the SCHS, respectively.

Long-term BMI changes were calculated based on the changes in BMI from baseline to follow-up year in the four cohorts, respectively.

The multiple linear regression model was used to test the associations of long chain n-3 PUFAs and fish intakes with long-term changes in BMI by *FADS* genotypes after adjustment for age, source of genotyping data, baseline BMI, smoking, alcohol intake, physical activity, total energy intake, alternate healthy eating index, television watching, sugar sweetened beverage, fried food consumption.

The results were pooled by means of fixed effects meta-analyses ( $P \geq 0.05$  for heterogeneity between studies).



## Figure Legends

### Figure 1 Genetic variant of *FADS* rs174570, long chain n-3 PUFAs and fish intakes and long-term BMI changes

Effect size (ES) (95% CI) values are  $\beta$  coefficients for interaction between the *FADS* variant rs174570 (additive model) and diets from results of the NHS, HPFS, WHI, and SCHS cohorts.

Data on BMI, long chain n-3 PUFAs (food sourced EPA+ DHA and total EPA+ DHA (food and supplemental use)) and fish consumptions were assessed at baseline in the NHS (1990), the HPFS (1990), the WHI (1994-1998), and the SCHS (1993-1998), respectively.

Data on follow-up BMI was assessed in 2000 in the NHS and HPFS, in the sixth follow-up year in the WHI, and from 2006 to 2010 in the SCHS, respectively.

Long-term BMI changes were calculated based on the changes in BMI from baseline to follow-up year in the four cohorts, respectively.

The multiple linear regression model was used to test the *FADS* variant-diets interaction by including a multiplicative interaction term in the models after adjustment for age, source of genotyping data, baseline BMI, smoking, alcohol intake, physical activity, total energy intake, alternate healthy eating index, television watching, sugar sweetened beverage, fried food consumption.

The results were pooled by means of fixed effects meta-analyses ( $P \geq 0.05$  for heterogeneity between studies).

### Figure 2 Genetic association of *FADS* variant rs174570 with long-term BMI change according to long chain n-3 PUFAs and fish intakes

Pooled-EUR: data from NHS, HPFS, and WHI were pooled.

Pooled Multiethnic: data from NHS, HPFS, WHI and SCHS were pooled.

Data are  $\beta$  coefficients  $\pm$  SE.

Numbers of participants across three categories ( $\leq 1/\text{wk}$ / $1\sim 6/\text{wk}$ / $\geq 1/\text{d}$ ) of fish intake in the NHS, HPFS, WHI, and SCHS are 1618/8465/1239, 977/5108/748, 894/4675/684, and 752/3935/576, respectively.

1  
2  
3 Frequency of fish intake:  $\leq 1$  serving per week, 1~6 servings per week, and 1 serving per day

4  
5 Data on BMI, long chain n-3 PUFAs (food sourced EPA+ DHA and total EPA+ DHA (food and  
6  
7 supplemental use)) and fish consumptions were assessed at baseline in the NHS (1990), the HPFS (1990),  
8  
9 the WHI (1994-1998), and the SCHS (1993-1998), respectively.

10  
11 Data on follow-up BMI was assessed in 2000 in the NHS and HPFS, in the sixth follow-up year in the  
12  
13 WHI, and from 2006 to 2010 in the SCHS, respectively.

14  
15 The multiple linear regression model was used to test the genetic association of the *FADS* variant (additive  
16  
17 model) with long-term changes in BMI by frequency of fish intake and tertiles of LC fatty acids after  
18  
19 adjustment for age, source of genotyping data, baseline BMI, smoking, alcohol intake, physical activity,  
20  
21 total energy intake, alternate healthy eating index, television watching, sugar sweetened beverage, fried  
22  
23 food consumption. The results were pooled by means of fixed effects meta-analyses ( $P \geq 0.05$  for  
24  
25 heterogeneity between studies).  
26  
27  
28  
29

30  
31 **Figure 3 Predicted long-term changes in BMI from long chain n-3 PUFAs intake according to *FADS***  
32  
33 **genotypes**

34  
35 Numbers of T carriers/Non-T carriers in the NHS and HPFS are 1698/9625, and 1025/5808, respectively.

36  
37 Black circles for T allele carriers and open circle for non-T-carriers.

38  
39 The multiple linear regression model was used to test the associations of long chain n-3 PUFAs intake with  
40  
41 long-term changes in BMI according to *FADS* genotypes after adjustment for age, source of genotyping  
42  
43 data, baseline BMI, smoking, alcohol intake, physical activity, total energy intake, alternate healthy eating  
44  
45 index, television watching, sugar sweetened beverage, fried food consumption.

46  
47 The individual participant data from the NHS and HPFS cohorts were pooled.  
48  
49  
50  
51  
52  
53  
54  
55  
56  
57  
58  
59  
60

1  
2  
3 **Figure 4 Predicted long-term changes in BMI from fish intake according to *FADS* genotypes**  
4

5 Numbers of T carriers/Non-T carriers in the NHS and HPFS are 1698/9625 and 1025/5808, respectively.  
6

7 Black circles for T allele carriers and open circle for non-T-carriers.  
8

9 The multiple linear regression model was used to test the associations of and fish intake with long-term  
10 changes in BMI according to *FADS* genotypes after adjustment for age, source of genotyping data,  
11 baseline BMI, smoking, alcohol intake, physical activity, total energy intake, alternate healthy eating  
12 index, television watching, sugar sweetened beverage, fried food consumption.  
13  
14  
15  
16  
17

18 The individual participant data from the NHS and HPFS cohorts were pooled.  
19  
20  
21  
22  
23  
24  
25  
26  
27  
28  
29  
30  
31  
32  
33  
34  
35  
36  
37  
38  
39  
40  
41  
42  
43  
44  
45  
46  
47  
48  
49  
50  
51  
52  
53  
54  
55  
56  
57  
58  
59  
60



254x190mm (200 x 200 DPI)



254x190mm (200 x 200 DPI)

1  
2  
3  
4  
5  
6  
7  
8  
9  
10  
11  
12  
13  
14  
15  
16  
17  
18  
19  
20  
21  
22  
23  
24  
25  
26  
27  
28  
29  
30  
31  
32  
33  
34  
35  
36  
37  
38  
39  
40  
41  
42  
43  
44  
45  
46  
47  
48  
49  
50  
51  
52  
53  
54  
55  
56  
57  
58  
59  
60



254x190mm (200 x 200 DPI)



254x190mm (200 x 200 DPI)

**Supplemental table 1. Annotation for the top six SNPs under positive selection in Greenlandic Inuit**

| Position <sup>1</sup> | Reference                       |                      | DAF            |            |      |       |       |      |      | PBS  |
|-----------------------|---------------------------------|----------------------|----------------|------------|------|-------|-------|------|------|------|
|                       | SNP<br>identification<br>number | Alleles <sup>2</sup> | CEU            | CHB        | GI   | NHS   | HPFS  | WHI  | SCHS |      |
|                       |                                 |                      | chr11:61627960 | rs74771917 | C/T  | 0.025 | 0.16  | 0.98 | /    |      |
| chr11:61631510        | rs3168072                       | A/T                  | 0.017          | 0.18       | 0.98 | /     | /     | /    | /    | 2.64 |
| chr11:61632310        | rs12577276                      | A/G                  | 0.017          | 0.18       | 0.98 | /     | /     | /    | /    | 2.64 |
| chr11:61641717        | rs7115739                       | G/T                  | 0.017          | 0.22       | 0.98 | 0.004 | 0.004 | /    | /    | 2.54 |
| chr11:61624414        | rs174602                        | C/T                  | 0.80           | 0.73       | 0.01 | 0.82  | 0.81  | /    | /    | 2.11 |
| chr11:61597212        | rs174570                        | C/T                  | 0.16           | 0.34       | 0.99 | 0.15  | 0.15  | 0.14 | 0.35 | 2.06 |

<sup>1</sup>Positions refer to human genome assembly hg19.

<sup>2</sup>Alleles are coded as ancestral/derived states.

PBS, the population branch statistic; DAF, derived allele frequency; CEU, European ancestry; CHB, an Chinese; GI, Greenlandic Inuit

DAFs for each population (CEU, CHB, and GI) and PBS values are reported, along with the genomic position for each SNP.



**Supplemental table 2 Main effect of the *FADS* variants on adiposity in the four cohorts**

| Outcomes (kg/m <sup>2</sup> ) | <i>FADS</i><br>SNPs | NHS          |       | HPFS         |       | WHI        |      | SCHS       |       | Pooled       |       |
|-------------------------------|---------------------|--------------|-------|--------------|-------|------------|------|------------|-------|--------------|-------|
|                               |                     | Beta ± SE    | P     | Beta ± SE    | P     | Beta ± SE  | P    | Beta ± SE  | P     | Beta ± SE    | P     |
| Baseline BMI                  | rs174570            | 0.03 ± 0.10  | 0.733 | -0.05 ± 0.09 | 0.538 | -0.06±0.17 | 0.72 | 0.24±0.08  | 0.002 | 0.08±0.05    | 0.06  |
| Baseline BMI                  | rs174602            | 0.08 ± 0.10  | 0.418 | -0.05 ± 0.08 | 0.536 | /          | /    | /          | /     | 0.00 ± 0.03  | 0.559 |
| Baseline BMI                  | rs7115739           | 0.25 ± 0.52  | 0.634 | -0.77 ± 0.43 | 0.077 | /          | /    | /          | /     | -0.35 ± 0.14 | 0.196 |
| Long-term BMI change          | rs174570            | -0.05 ± 0.06 | 0.401 | 0.01 ± 0.05  | 0.917 | -0.02±0.09 | 0.77 | -0.02±0.08 | 0.85  | -0.02±0.03   | 0.94  |
| Long-term BMI change          | rs174602            | -0.14 ± 0.06 | 0.009 | 0.04 ± 0.05  | 0.413 | /          | /    | /          | /     | -0.04 ± 0.01 | 0.025 |
| Long-term BMI change          | rs7115739           | 0.45 ± 0.29  | 0.124 | -0.23 ± 0.26 | 0.359 | /          | /    | /          | /     | 0.06 ± 0.08  | 0.183 |

Long-term BMI change: BMI change from 1990 to 2000.

Numbers of T carriers/Non-T carriers in the NHS, HPFS, WHI, and SCHS are 1698/9625, 1025/5808, 876/5378, and 1842/3422, respectively.

Effect size (ES) values are  $\beta$  coefficients for relationship between the *FADS* variant rs174570 (additive model) and adiposity.

The general linear model was used to test the genetic association of *FADS* variants with long-term changes in BMI after adjustment for age, source of genotyping data.

**Supplemental table 3 Genetic association of *FADS* variant with long-term changes in body weight according to long chain n-3 PUFAs and fish intakes**

|                                    | Difference in long-term changes in weight, |            |            | P for interaction |
|------------------------------------|--------------------------------------------|------------|------------|-------------------|
|                                    | kg                                         |            |            |                   |
| <b>Total Fish, serving/day</b>     | ≤1/wk                                      | 1~6/wk     | ≥1/d       |                   |
| NHS                                | -0.69±0.64                                 | -0.13±0.49 | 1.78±1.64  | 0.05              |
| HPFS                               | -0.99±0.85                                 | 0.54±0.53  | 1.52±1.69  | 0.12              |
| WHI                                | -0.22±0.42                                 | 0.16±0.34  | 1.26±1.57  | 0.13              |
| SCHS                               | -0.42±0.29                                 | -0.44±0.28 | 0.20±0.29  | 0.08              |
| Pooled                             | -0.44±0.22                                 | -0.10±0.18 | 0.31±0.28  | 0.01              |
| <b>Food-sourced EPA, g/day</b>     | T1                                         | T2         | T3         |                   |
| NHS                                | -0.77±0.62                                 | -0.25±0.72 | 0.53±0.64  | 0.06              |
| HPFS                               | -1.19±0.82                                 | 0.75±0.73  | 0.72±0.74  | 0.41              |
| WHI                                | -0.19±0.42                                 | 0.24±0.47  | 0.14±0.48  | 0.20              |
| Pooled                             | -0.50±0.32                                 | 0.24±0.34  | 0.37±0.34  | 0.10              |
| <b>Food-sourced DHA, g/day</b>     | T1                                         | T2         | T3         |                   |
| NHS                                | -0.53±0.62                                 | -0.39±0.70 | 0.53±0.65  | 0.01              |
| HPFS                               | -1.06±0.82                                 | 0.49±0.71  | 0.89±0.76  | 0.09              |
| WHI                                | -0.20±0.43                                 | 0.22±0.42  | 0.30±0.50  | 0.26              |
| Pooled                             | -0.43±0.32                                 | 0.15±0.32  | 0.49±0.35  | 0.01              |
| <b>Food-sourced EPA+DHA, g/day</b> | T1                                         | T2         | T3         |                   |
| NHS                                | -0.56±0.63                                 | -0.32±0.68 | 0.49±0.66  | 0.01              |
| HPFS                               | -1.25±0.83                                 | 0.68±0.73  | 0.84±0.74  | 0.09              |
| WHI                                | -0.02±0.43                                 | 0.16±0.44  | 0.14±0.49  | 0.23              |
| SCHS                               | -0.47±0.29                                 | -0.16±0.28 | -0.03±0.29 | 0.10              |

|                             |            |            |           |       |
|-----------------------------|------------|------------|-----------|-------|
| Pooled                      | -0.56±0.25 | -0.09±0.24 | 0.14±0.25 | 0.005 |
| <b>Total EPA+DHA, g/day</b> | <b>T1</b>  | <b>T2</b>  | <b>T3</b> |       |
| NHS                         | -0.58±0.63 | -0.30±0.68 | 0.46±0.66 | 0.02  |
| HPFS                        | -1.20±0.82 | 0.75±0.70  | 0.86±0.77 | 0.18  |
| WHI                         | -0.48±0.47 | 0.64±0.43  | 0.04±0.47 | 0.15  |
| Pooled                      | -0.64±0.34 | 0.45±0.32  | 0.32±0.34 | 0.02  |

Data are  $\beta$  coefficients  $\pm$  SE.

Numbers of T carriers/Non-T carriers in the NHS, HPFS, WHI, and SCHS are 1698/9625, 1025/5808, 876/5378, and 1842/3422, respectively.

Frequency of fish intake:  $\leq 1$  serving per week, 1~6 servings per week, and 1 serving per day

Data on baseline fish and fatty acids consumptions were assessed in 1990 (NHS) and 1990 (HPFS).

Data on body weight were assessed in 1990 and 2000 in NHS and 1990 and 2000 in HPFS.

The general linear model was used to test the genetic association with long-term changes in body weight according to baseline long chain n-3 PUFAs and fish intakes after adjustment for age, source of genotyping data, baseline body weight, smoking, alcohol intake, physical activity, total energy intake, alternate healthy eating index, television watching, sugar sweetened beverage, fried food consumption.

Data from three or four cohorts pooled by means of fixed effects meta-analyses (if  $P \geq 0.05$  for heterogeneity between studies).

**Supplemental table 4 Associations of long chain n-3 PUFAs and fish intakes with long-term changes in body weight according to *FADS* genotypes**

| Cohorts                 |                | Long-term changes in weight, kg |            |            | P for trend |
|-------------------------|----------------|---------------------------------|------------|------------|-------------|
| Total Fish, serving/day |                | ≤1/wk                           | 1~6/wk     | ≥1/d       |             |
| NHS                     | Non T carriers | 4.91±0.34                       | 5.78±0.24  | 7.00±0.79  | 0.008       |
|                         | T carriers     | 4.45±0.61                       | 5.64±0.46  | 9.26±1.44  | 0.001       |
| HPFS                    | Non T carriers | 0.44±0.06                       | 0.52±0.04  | 0.56±0.12  | 0.99        |
|                         | T carriers     | 0.25±0.10                       | 0.53±0.07  | 0.76±0.21  | 0.08        |
| WHI                     | Non T carriers | -0.25±0.23                      | -0.43±0.18 | -0.91±0.93 | 0.50        |
|                         | T carriers     | -0.56±0.37                      | -0.25±0.28 | 1.30±1.71  | 0.13        |
| SCHS                    | Non T carriers | -3.15±0.23                      | -3.50±0.21 | -3.38±0.21 | 0.48        |
|                         | T carriers     | -3.68±0.20                      | -3.41±0.19 | -3.34±0.20 | 0.16        |
| Food-sourced EPA, g/day |                | T1                              | T2         | T3         |             |
| NHS                     | Non T carriers | 4.89±0.33                       | 5.89±0.33  | 5.95±0.33  | 0.24        |
|                         | T carriers     | 4.45±0.59                       | 5.52±0.63  | 6.46±0.61  | 0.34        |
| HPFS                    | Non T carriers | 0.50±0.05                       | 0.54±0.05  | 0.45±0.05  | 0.15        |
|                         | T carriers     | 0.29±0.10                       | 0.54±0.09  | 0.52±0.09  | 0.66        |
| WHI                     | Non T carriers | -0.30±0.25                      | -0.54±0.24 | -0.29±0.24 | 0.42        |
|                         | T carriers     | -0.51±0.39                      | -0.36±0.37 | -0.15±0.38 | 0.14        |
| Food-sourced DHA, g/day |                | T1                              | T2         | T3         |             |
| NHS                     | Non T carriers | 4.78±0.33                       | 5.56±0.34  | 6.32±0.33  | 0.14        |
|                         | T carriers     | 4.50±0.60                       | 5.07±0.63  | 6.77±0.61  | 0.004       |
| HPFS                    | Non T carriers | 0.48±0.05                       | 0.54±0.05  | 0.46±0.06  | 0.40        |
|                         | T carriers     | 0.27±0.10                       | 0.50±0.09  | 0.59±0.09  | 0.15        |
| WHI                     | Non T carriers | -0.41±0.25                      | -0.25±0.24 | -0.45±0.25 | 0.51        |

|                                    |                |  |            |            |            |        |
|------------------------------------|----------------|--|------------|------------|------------|--------|
|                                    | T carriers     |  | -0.71±0.39 | -0.15±0.37 | -0.16±0.39 | 0.18   |
| <b>Food-sourced EPA+DHA, g/day</b> |                |  | T1         | T2         | T3         |        |
| NHS                                | Non T carriers |  | 4.69±0.34  | 5.45±0.33  | 6.51±0.33  | 0.02   |
|                                    | T carriers     |  | 4.44±0.61  | 5.00±0.61  | 6.92±0.61  | 0.0003 |
| HPFS                               | Non T carriers |  | 0.48±0.05  | 0.53±0.05  | 0.47±0.05  | 0.93   |
|                                    | T carriers     |  | 0.26±0.10  | 0.49±0.09  | 0.59±0.09  | 0.08   |
| WHI                                | Non T carriers |  | -0.44±0.24 | -0.23±0.23 | -0.43±0.24 | 0.47   |
|                                    | T carriers     |  | -0.52±0.38 | -0.15±0.37 | -0.33±0.38 | 0.15   |
| SCHS                               | Non T carriers |  | -3.44±0.21 | -3.58±0.22 | -3.05±0.21 | 0.89   |
|                                    | T carriers     |  | -3.73±0.19 | -3.57±0.19 | -3.12±0.19 | 0.12   |
| <b>Total EPA+DHA, g/day</b>        |                |  | T1         | T2         | T3         |        |
| NHS                                | Non T carriers |  | 4.74±0.34  | 5.55±0.32  | 6.36±0.34  | 0.81   |
|                                    | T carriers     |  | 4.49±0.61  | 5.16±0.60  | 6.70±0.61  | 0.03   |
| HPFS                               | Non T carriers |  | 0.49±0.05  | 0.53±0.05  | 0.47±0.06  | 0.24   |
|                                    | T carriers     |  | 0.26±0.10  | 0.51±0.09  | 0.58±0.09  | 0.33   |
| WHI                                | Non T carriers |  | 0.32±0.27  | -0.84±0.23 | -0.60±0.28 | 0.19   |
|                                    | T carriers     |  | -0.26±0.45 | -0.21±0.37 | -0.02±0.11 | 0.08   |

Data on baseline fish and fatty acids consumptions were assessed in 1990 (NHS) and 1990 (HPFS).

Numbers of T carriers/Non-T carriers in the NHS, HPFS, WHI, and SCHS are 1698/9625, 1025/5808, 876/5378, and 1842/3422, respectively.

Data on body weight were assessed in 1990 and 2000 in NHS and 1990 and 2000 in HPFS.

The general linear model was used to test the associations of long chain n-3 PUFAs and fish intakes with long-term changes in body weight by *FADS* genotypes after adjustment for age, source of genotyping data, baseline body weight, smoking, alcohol intake, physical activity, total energy intake, alternate healthy eating index, television watching, sugar sweetened beverage, fried food consumption.

Data from two cohorts pooled by means of fixed effects meta-analyses (if  $P \geq 0.05$  for heterogeneity between studies) or random effects meta-analyses (if  $P < 0.05$  for heterogeneity between studies).

**Supplemental Table 5 Associations of long chain n-3 PUFAs and fish intakes with long-term changes in BMI according to *FADS* genotypes**

| Diets                   | <i>FADS</i> genotypes | Long chain n-3 PUFAs and fish intakes |           |           | P for trend        | P for interaction* |
|-------------------------|-----------------------|---------------------------------------|-----------|-----------|--------------------|--------------------|
|                         |                       | Categories of diets                   |           |           |                    |                    |
| Food-sourced EPA, g/day |                       | T1                                    | T2        | T3        |                    |                    |
| NHS                     | Non-T carriers        | 0.82±0.06                             | 1.00±0.06 | 1.01±0.06 | 0.24               | 0.05               |
|                         | T carriers            | 0.72±0.10                             | 0.94±0.11 | 1.10±0.11 | 0.29               |                    |
| HPFS                    | Non-T carriers        | 0.48±0.05                             | 0.54±0.05 | 0.47±0.05 | 0.72               | 0.37               |
|                         | T carriers            | 0.23±0.11                             | 0.54±0.10 | 0.52±0.09 | 0.45               |                    |
| WHI                     | Non-T carriers        | 0.10±0.09                             | 0.09±0.09 | 0.45±0.09 | 0.21               | 0.02               |
|                         | T carriers            | -0.08±0.15                            | 0.23±0.15 | 0.46±0.15 | 0.003              |                    |
| Pooled                  | Non-T carriers        | 0.54±0.04                             | 0.63±0.04 | 0.65±0.04 | 0.35               | 0.01               |
|                         | T carriers            | 0.39±0.07                             | 0.63±0.07 | 0.70±0.06 | 0.01               |                    |
| Food-sourced DHA, g/day |                       | T1                                    | T2        | T3        |                    |                    |
| NHS                     | Non-T carriers        | 0.80±0.06                             | 0.94±0.06 | 1.08±0.06 | 0.14               | 0.009              |
|                         | T carriers            | 0.74±0.10                             | 0.83±0.11 | 1.17±0.10 | 0.002              |                    |
| HPFS                    | Non-T carriers        | 0.46±0.05                             | 0.54±0.05 | 0.49±0.05 | 0.99               | 0.05               |
|                         | T carriers            | 0.24±0.10                             | 0.49±0.10 | 0.58±0.09 | 0.05               |                    |
| WHI                     | Non-T carriers        | 0.03±0.09                             | 0.20±0.09 | 0.42±0.09 | 0.03               | 0.06               |
|                         | T carriers            | -0.10±0.15                            | 0.33±0.15 | 0.39±0.15 | 0.006              |                    |
| Pooled                  | Non-T carriers        | 0.51±0.04                             | 0.63±0.04 | 0.68±0.04 | 0.1                | 0.002              |
|                         | T carriers            | 0.38±0.06                             | 0.58±0.07 | 0.77±0.06 | 7×10 <sup>-4</sup> |                    |

Data are means ± SE.

<sup>1</sup>P for interaction was generated from dominant model of *FADS* rs174570 (CC vs CT+TT).

Numbers of T carriers/Non-T carriers in the NHS, HPFS, WHI, and SCHS are 1698/9625, 1025/5808, 876/5378, and 1842/3422, respectively.

Data on BMI, long chain n-3 PUFAs consumptions were assessed at baseline in the NHS (1990), the HPFS (1990), the WHI (1994-1998), and the SCHS (1993-1998), respectively.

Data on follow-up BMI was assessed in 2000 in the NHS and HPFS, in the sixth follow-up year in the

1  
2  
3  
4  
5  
6 WHI, and from 2006 to 2010 in the SCHS, respectively.

7  
8 Long-term BMI changes were calculated based on the changes in BMI from baseline to follow-up year in  
9  
10 the four cohorts, respectively.

11  
12 The general linear model was used to test the associations of long chain n-3 PUFAs and fish intakes with  
13  
14 long-term changes in BMI by *FADS* genotypes after adjustment for age, source of genotyping data,  
15  
16 baseline BMI, smoking, alcohol intake, physical activity, total energy intake, alternate healthy eating index,  
17  
18 television watching, sugar sweetened beverage, fried food consumption.

19  
20 The results were pooled by means of fixed effects meta-analyses (if  $P \geq 0.05$  for heterogeneity between  
21  
22 studies).

23  
24 Registration: [www. clinicaltrials.gov](http://www.clinicaltrials.gov). Registration ID: NCT03348566  
25  
26  
27  
28  
29  
30  
31  
32  
33  
34  
35  
36  
37  
38  
39  
40  
41  
42  
43  
44  
45  
46  
47  
48  
49  
50  
51  
52  
53  
54  
55  
56  
57  
58  
59  
60

1  
2  
3  
4  
5  
6  
7  
8  
9  
10  
11  
12  
13  
14  
15  
16  
17  
18  
19  
20  
21  
22  
23  
24  
25  
26  
27  
28  
29  
30  
31  
32  
33  
34  
35  
36  
37  
38  
39  
40  
41  
42  
43  
44  
45  
46  
47

**TABLE 1. STREGA reporting recommendations, extended from STROBE Statement**

| Item                        | Item number | STROBE Guideline                                                                                                   | Extension for Genetic Association Studies (STREGA)                                                            |
|-----------------------------|-------------|--------------------------------------------------------------------------------------------------------------------|---------------------------------------------------------------------------------------------------------------|
| <b>Title and Abstract</b>   | 1           | (a) Indicate the study’s design with a commonly used term in the title or the abstract. <b>(p. 3)</b>              |                                                                                                               |
|                             |             | (b) Provide in the abstract an informative and balanced summary of what was done and what was found. <b>(p. 3)</b> |                                                                                                               |
| <b>Introduction</b>         |             |                                                                                                                    |                                                                                                               |
| <i>Background rationale</i> | 2           | Explain the scientific background and rationale for the investigation being reported. <b>(p. 4)</b>                |                                                                                                               |
| <i>Objectives</i>           | 3           | State specific objectives, including any pre-specified hypotheses.                                                 | <b>State if the study is the first report of a genetic association, a replication effort, or both. (p. 3)</b> |
| <b>Methods</b>              |             |                                                                                                                    |                                                                                                               |
| <i>Study design</i>         | 4           | Present key elements of study design early in the paper. <b>(p. 5)</b>                                             |                                                                                                               |



| Item                | Item number | STROBE Guideline                                                                                                                                                                                                                                                                                                                                                                                                                                                                                                                                                                                                                                                                                                                                      | Extension for Genetic Association Studies (STREGA)                                                                                                                                                                              |
|---------------------|-------------|-------------------------------------------------------------------------------------------------------------------------------------------------------------------------------------------------------------------------------------------------------------------------------------------------------------------------------------------------------------------------------------------------------------------------------------------------------------------------------------------------------------------------------------------------------------------------------------------------------------------------------------------------------------------------------------------------------------------------------------------------------|---------------------------------------------------------------------------------------------------------------------------------------------------------------------------------------------------------------------------------|
| <i>Setting</i>      | 5           | Describe the setting, locations and relevant dates, including periods of recruitment, exposure, follow-up, and data collection. <b>(p. 3)</b>                                                                                                                                                                                                                                                                                                                                                                                                                                                                                                                                                                                                         |                                                                                                                                                                                                                                 |
| <i>Participants</i> | 6           | <p>(a) <b>Cohort study</b> – Give the eligibility criteria, and the sources and methods of selection of participants. Describe methods of follow-up. <b>(p. 5)</b></p> <p><b>Case-control study</b> – Give the eligibility criteria, and the sources and methods of case ascertainment and control selection. Give the rationale for the choice of cases and controls.</p> <p><b>Cross-sectional study</b> – Give the eligibility criteria, and the sources and methods of selection of participants.</p> <hr/> <p>(b) <b>Cohort study</b> – For matched studies, give matching criteria and number of exposed and unexposed.</p> <p><b>Case-control study</b> – For matched studies, give matching criteria and the number of controls per case.</p> | <b><i>Give information on the criteria and methods for selection of subsets of participants from a larger study, when relevant. (p. 5)</i></b>                                                                                  |
| <i>Variables</i>    | 7           | <b><i>(a)</i></b> Clearly define all outcomes, exposures, predictors, potential confounders, and effect modifiers. Give diagnostic criteria, if applicable. <b>(p. 5)</b>                                                                                                                                                                                                                                                                                                                                                                                                                                                                                                                                                                             | <b><i>(b)</i></b> Clearly define genetic exposures (genetic variants) using a widely-used nomenclature system. Identify variables likely to be associated with population stratification (confounding by ethnic origin). (p. 5) |

1  
2  
3  
4  
5  
6  
7  
8  
9  
10  
11  
12  
13  
14  
15  
16  
17  
18  
19  
20  
21  
22  
23  
24  
25  
26  
27  
28  
29  
30  
31  
32  
33  
34  
35  
36  
37  
38  
39  
40  
41  
42  
43  
44  
45  
46  
47

| Item                            | Item number | STROBE Guideline                                                                                                                                                                                        | Extension for Genetic Association Studies (STREGA)                                                                                                                                                                                                                                                                                                                                                                                                                       |
|---------------------------------|-------------|---------------------------------------------------------------------------------------------------------------------------------------------------------------------------------------------------------|--------------------------------------------------------------------------------------------------------------------------------------------------------------------------------------------------------------------------------------------------------------------------------------------------------------------------------------------------------------------------------------------------------------------------------------------------------------------------|
| <i>Data sources measurement</i> | 8*          | <i>(a)</i> For each variable of interest, give sources of data and details of methods of assessment (measurement). Describe comparability of assessment methods if there is more than one group. (p. 5) | <i>(b)</i> Describe laboratory methods, including source and storage of DNA, genotyping methods and platforms (including the allele calling algorithm used, and its version), error rates and call rates. State the laboratory/centre where genotyping was done. Describe comparability of laboratory methods if there is more than one group. Specify whether genotypes were assigned using all of the data from the study simultaneously or in smaller batches. (p. 5) |
| <i>Bias</i>                     | 9           | <i>(a)</i> Describe any efforts to address potential sources of bias. (p. 5 &6)                                                                                                                         | <i>(b)</i> For quantitative outcome variables, specify if any investigation of potential bias resulting from pharmacotherapy was undertaken. If relevant, describe the nature and magnitude of the potential bias, and explain what approach was used to deal                                                                                                                                                                                                            |

| Item                          | Item number | STROBE Guideline                                                                                                                                                                                                                                                                                                                                                                                                                                                                                                                                                                                                                         | Extension for Genetic Association Studies (STREGA)                                     |
|-------------------------------|-------------|------------------------------------------------------------------------------------------------------------------------------------------------------------------------------------------------------------------------------------------------------------------------------------------------------------------------------------------------------------------------------------------------------------------------------------------------------------------------------------------------------------------------------------------------------------------------------------------------------------------------------------------|----------------------------------------------------------------------------------------|
|                               |             |                                                                                                                                                                                                                                                                                                                                                                                                                                                                                                                                                                                                                                          | <i>with this. (p. 5 &amp;6)</i>                                                        |
| <i>Study size</i>             | 10          | Explain how the study size was arrived at. <b>(p. 5 &amp;6)</b>                                                                                                                                                                                                                                                                                                                                                                                                                                                                                                                                                                          |                                                                                        |
| <i>Quantitative variables</i> | 11          | Explain how quantitative variables were handled in the analyses. If applicable, describe which groupings were chosen, and why. <b>(p. 7)</b>                                                                                                                                                                                                                                                                                                                                                                                                                                                                                             | <b><i>If applicable, describe how effects of treatment were dealt with. (p. 7)</i></b> |
| <i>Statistical methods</i>    | 12          | <p>(a) Describe all statistical methods, including those used to control for confounding. <b>(p. 7-9)</b></p> <hr/> <p>(b) Describe any methods used to examine subgroups and interactions. <b>(p. 9)</b></p> <hr/> <p>(c) Explain how missing data were addressed. <b>(p. 9)</b></p> <hr/> <p>(d) <b>Cohort study</b> – If applicable, explain how loss to follow-up was addressed. <b>(p. 9)</b></p> <p><b>Case-control study</b> – If applicable, explain how matching of cases and controls was addressed.</p> <p><b>Cross-sectional study</b> – If applicable, describe analytical methods taking account of sampling strategy.</p> | <b><i>State software version used and options (or settings) chosen. (p. 9)</i></b>     |

1  
2  
3  
4  
5  
6  
7  
8  
9  
10  
11  
12  
13  
14  
15  
16  
17  
18  
19  
20  
21  
22  
23  
24  
25  
26  
27  
28  
29  
30  
31  
32  
33  
34  
35  
36  
37  
38  
39  
40  
41  
42  
43  
44  
45  
46  
47

| Item | Item number | STROBE Guideline                                                                                                                                                                                                 | Extension for Genetic Association Studies (STREGA)                                                                         |
|------|-------------|------------------------------------------------------------------------------------------------------------------------------------------------------------------------------------------------------------------|----------------------------------------------------------------------------------------------------------------------------|
|      |             | (e) Describe any sensitivity analyses. (p. 9)                                                                                                                                                                    |                                                                                                                            |
|      |             | Hardy-Weinberg equilibrium was tested using Chi-square test. (p. 9)                                                                                                                                              | <b>(f) State whether Hardy-Weinberg equilibrium was considered and, if so, how.</b>                                        |
|      |             | We assumed that each SNP in the panel acts independently in an additive manner. We coded the SNPs as following: rs174570 (TT=2, TC=1, CC=0); rs174602 (TT=2, TC=1, CC=0); rs7115739 (TT=2, TG=1, GG=0). (p. 8&9) | <b>(g) Describe any methods used for inferring genotypes or haplotypes.</b>                                                |
|      |             |                                                                                                                                                                                                                  | <b>(h) Describe any methods used to assess or address population stratification. (p. 9)</b>                                |
|      |             |                                                                                                                                                                                                                  | <b>(i) Describe any methods used to address multiple comparisons or to control risk of false positive findings. (p. 9)</b> |
|      |             |                                                                                                                                                                                                                  | <b>(j) Describe any methods used to address and correct for relatedness among subjects(p. 9)</b>                           |

| Item                    | Item number | STROBE Guideline                                                                                                                                                                                                                                                                                                                                                                                       | Extension for Genetic Association Studies (STREGA)                                                                                                 |
|-------------------------|-------------|--------------------------------------------------------------------------------------------------------------------------------------------------------------------------------------------------------------------------------------------------------------------------------------------------------------------------------------------------------------------------------------------------------|----------------------------------------------------------------------------------------------------------------------------------------------------|
| <b>Results</b>          |             |                                                                                                                                                                                                                                                                                                                                                                                                        |                                                                                                                                                    |
| <i>Participants</i>     | 13*         | <p>(a) Report the numbers of individuals at each stage of the study – e.g., numbers potentially eligible, examined for eligibility, confirmed eligible, included in the study, completing follow-up, and analysed. <b>(p. 10)</b></p> <hr/> <p>(b) Give reasons for non-participation at each stage. <b>(p. 10)</b></p> <hr/> <p>(c) Consider use of a flow diagram. <b>(p. 10)</b></p>                | <p><b>Report numbers of individuals in whom genotyping was attempted and numbers of individuals in whom genotyping was successful. (p. 10)</b></p> |
| <i>Descriptive data</i> | 14*         | <p>(a) Give characteristics of study participants (e.g., demographic, clinical, social) and information on exposures and potential confounders. <b>(p. 10)</b></p> <hr/> <p>(b) Indicate the number of participants with missing data for each variable of interest. <b>(p. 10)</b></p> <hr/> <p>(c) <b>Cohort study</b> – Summarize follow-up time, e.g. average and total amount. <b>(p. 10)</b></p> | <p><b>Consider giving information by genotype. (p. 10)</b></p>                                                                                     |

1  
2  
3  
4  
5  
6  
7  
8  
9  
10  
11  
12  
13  
14  
15  
16  
17  
18  
19  
20  
21  
22  
23  
24  
25  
26  
27  
28  
29  
30  
31  
32  
33  
34  
35  
36  
37  
38  
39  
40  
41  
42  
43  
44  
45  
46  
47

| Item                | Item number | STROBE Guideline                                                                                                                                                                                                                | Extension for Genetic Association Studies (STREGA)                       |
|---------------------|-------------|---------------------------------------------------------------------------------------------------------------------------------------------------------------------------------------------------------------------------------|--------------------------------------------------------------------------|
| <i>Outcome data</i> | 15 *        | <b>Cohort study</b> -Report numbers of outcome events or summary measures over time.                                                                                                                                            | <b>Report outcomes (phenotypes) for each genotype category over time</b> |
|                     |             | <b>Case-control study</b> – Report numbers in each exposure category, or summary measures of exposure.                                                                                                                          | <b>Report numbers in each genotype category</b>                          |
|                     |             | <b>Cross-sectional study</b> – Report numbers of outcome events or summary measures.                                                                                                                                            | <b>Report outcomes (phenotypes) for each genotype category</b>           |
| <i>Main results</i> | 16          | (a) Give unadjusted estimates and, if applicable, confounder-adjusted estimates and their precision (e.g., 95% confidence intervals). Make clear which confounders were adjusted for and why they were included. <b>(p. 10)</b> | <b>(d) Report results of any adjustments for multiple</b>                |
|                     |             | (b) Report category boundaries when continuous variables were categorized. <b>(p. 10)</b>                                                                                                                                       |                                                                          |
|                     |             | (c) If relevant, consider translating estimates of relative risk into absolute risk for a meaningful time period. <b>(p. 10)</b>                                                                                                |                                                                          |

| Item                  | Item number | STROBE Guideline                                                                                                                                                    | Extension for Genetic Association Studies (STREGA)                                                                                 |
|-----------------------|-------------|---------------------------------------------------------------------------------------------------------------------------------------------------------------------|------------------------------------------------------------------------------------------------------------------------------------|
|                       |             |                                                                                                                                                                     | <i>comparisons. (p. 10)</i>                                                                                                        |
| <i>Other analyses</i> | 17          | (a) Report other analyses done – e.g., analyses of subgroups and interactions, and sensitivity analyses. (p. 10)                                                    |                                                                                                                                    |
|                       |             |                                                                                                                                                                     | <i>(b) If numerous genetic exposures (genetic variants) were examined, summarize results from all analyses undertaken. (p. 10)</i> |
|                       |             |                                                                                                                                                                     | <i>(c) If detailed results are available elsewhere, state how they can be accessed. (p. 10)</i>                                    |
| <b>Discussion</b>     |             |                                                                                                                                                                     |                                                                                                                                    |
| <i>Key results</i>    | 18          | Summarize key results with reference to study objectives. (p. 11)                                                                                                   |                                                                                                                                    |
| <i>Limitations</i>    | 19          | Discuss limitations of the study, taking into account sources of potential bias or imprecision. Discuss both direction and magnitude of any potential bias. (p. 11) |                                                                                                                                    |

1  
2  
3  
4  
5  
6  
7  
8  
9  
10  
11  
12  
13  
14  
15  
16  
17  
18  
19  
20  
21  
22  
23  
24  
25  
26  
27  
28  
29  
30  
31  
32  
33  
34  
35  
36  
37  
38  
39  
40  
41  
42  
43  
44  
45  
46  
47

| Item                     | Item number | STROBE Guideline                                                                                                                                                                           | Extension for Genetic Association Studies (STREGA) |
|--------------------------|-------------|--------------------------------------------------------------------------------------------------------------------------------------------------------------------------------------------|----------------------------------------------------|
| <i>Interpretation</i>    | 20          | Give a cautious overall interpretation of results considering objectives, limitations, multiplicity of analyses, results from similar studies, and other relevant evidence. <b>(p. 11)</b> |                                                    |
| <i>Generalizability</i>  | 21          | Discuss the generalizability (external validity) of the study results. <b>(p. 11)</b>                                                                                                      |                                                    |
| <b>Other Information</b> |             |                                                                                                                                                                                            |                                                    |
| <i>Funding</i>           | 22          | Give the source of funding and the role of the funders for the present study and, if applicable, for the original study on which the present article is based. <b>(p. 14)</b>              |                                                    |

STREGA = STrengthening the REporting of Genetic Association studies; STROBE = STrengthening the Reporting of Observational Studies in Epidemiology.

\* Give information separately for cases and controls in case-control studies and, if applicable, for exposed and unexposed groups in cohort and cross-sectional studies.
